# Supplementary material
Source: PubMed Central journal article supplement (PMC4793657)
Supplement: nowa013617.ww1_default.pdf [file nowa013617.ww1_default.pdf]

Appendix 1. Design discrepancies [posted as supplied by author]

| Discrepancy ID | Discrepancy summary                                          | Paper 1 | Detail from Paper 1                                                                                                               | Paper 2                        | Detail from Paper 2                                                                                           | Paper 3 | Detail from Paper 3                                              | Paper 4 | Detail from Paper 4                                               |
|----------------|--------------------------------------------------------------|---------|-----------------------------------------------------------------------------------------------------------------------------------|--------------------------------|---------------------------------------------------------------------------------------------------------------|---------|------------------------------------------------------------------|---------|-------------------------------------------------------------------|
| t07/101        | Contradiction whether randomized or acceptor-rejecter        | t07r1   | Definitely randomized between cell therapy and control, e.g. pages 53, 67                                                         | t07r10                         | Patients refusing cell therapy acted as the control group, p723                                               | t07r6   | Same document describes it both as randomized and non-randomized |         |                                                                   |
| t07/102        | Contradiction whether placebo (i.e. blinded) or open control | t07r1   | Describes randomization, but not the use of Placebo                                                                               | t07r10                         | Describes a controlled acceptor rejecter study. No Placebo mentioned                                          | t07r3   | BMCs vs. Placebo                                                 |         |                                                                   |
| t07/103        | Contradiction if cells were cultivated overnight or not      | t07r10  | No                                                                                                                                | t07r1                          | Yes (publications' references 6 and 8)                                                                        | t07r6   | Yes                                                              |         |                                                                   |
| t08/101        | Contradiction whether acceptor-rejecter or randomized        | t08r2   | Appears to be acceptor-rejecter but this is contradicted by 4 Publications from same group                                        | t08r3                          | Randomly Allocated                                                                                            | t08r4   | Randomized controlled studies                                    | t08r6   | 10 randomly allocated to the stem cell therapy and 10 as controls |
| t08/103        | Possible concealed dual therapy                              | t08r3   | Fourth column: 21 chronic ischaemic and 3 DCM patients treated in Dusseldorf a second time, 3-12 months after the first treatment | t07r1<br>t07r10<br>t08r2 t49r3 | Not clear whether the 21 double-treated patients were counted once, twice, or not at all in the other reports |         |                                                                  |         |                                                                   |

|                |                                                                                                                                                  |                      |                             |                   |                                                                                         |               |                              |       |     |
|----------------|--------------------------------------------------------------------------------------------------------------------------------------------------|----------------------|-----------------------------|-------------------|-----------------------------------------------------------------------------------------|---------------|------------------------------|-------|-----|
| <b>t09/101</b> | Contradiction in the number of patients randomized (leading to 19 patients per group)                                                            | t09r3 p.172 Abstract | 38 patients were randomized | t09r2 p.30 Figure | 41 patients included for randomization                                                  |               |                              |       |     |
| <b>t09/102</b> | Contradiction between number of patients randomized vs. number of patients in randomized controls and recipients                                 | t09r2 p.30 Figure    | 41 patients were randomized | t09r2 p.30 Figure | Each group (controls and recipients) contained 21 assigned patients (2x21=42)           |               |                              |       |     |
| <b>t13/101</b> | Discrepancy between the total number and the sum of patients excluded from control group for the assessment of changes in max oxygen consumption | t13r2 Figure 1       | 4 excluded                  | t13r2 Figure 1    | Reasons given for 3 patients (1 for transplant, 1 for LVAD placement and 1 for no show) |               |                              |       |     |
| <b>t21/101</b> | Contradiction if control group existed or not                                                                                                    | t21r12 t21r3         | No, No                      | t21r5 t21r7       | Yes (1:1), Yes (1:1)                                                                    | t21r11 t21r10 | Yes (Non 1:1), Yes (Non 1:1) | t21r9 | Yes |

|                          |                                                                                               |                            |                                                                                                                   |       |                                                                                                                      |        |                                                                            |       |                  |
|--------------------------|-----------------------------------------------------------------------------------------------|----------------------------|-------------------------------------------------------------------------------------------------------------------|-------|----------------------------------------------------------------------------------------------------------------------|--------|----------------------------------------------------------------------------|-------|------------------|
| <b>t21/102</b>           | Acceptor-rejecter (3 publications by group) ..                                                | t21r5                      | Accepters versus Rejecters                                                                                        | t21r7 | Accepters versus Rejecters                                                                                           | t21r8  | Same document describes it both as randomized and non-randomized           |       |                  |
| <b>t21/102 continued</b> | .. versus Randomized (7 publications by same group regarding what seems to be the same study) | t21r13 (author's response) | RANDOMIZED: "all our chronic patients (n=36) (t21) fulfilled the same inclusion criteria (e.g. randomization...)" | t21r4 | Table 1: states IACT is: "RANDOMISIERT E, kontrollierte Studie"                                                      | t21r11 | in the RANDOMIZED control group no significant changes were observed...    | t08r3 | RANDOMIZED Study |
| <b>t21/102 continued</b> |                                                                                               | t21r8                      | RANDOMIZED control group                                                                                          | t21r9 | while in the RANDOMIZED control group no significant changes were observed                                           | t07r6  | while in the RANDOMIZED control group no significant changes were observed |       |                  |
| <b>t21/103</b>           | Seems to be an undeclared duplicate publication                                               | t21r5                      |                                                                                                                   | t21r7 |                                                                                                                      |        |                                                                            |       |                  |
| <b>t21/104</b>           | The whole is less than the sum of the parts                                                   | t21r1                      | n=70 divided to 80 recipients and 35 controls                                                                     |       |                                                                                                                      |        |                                                                            |       |                  |
| <b>t21/105</b>           | Contradiction if patients received inotropes or not                                           | t21r5                      | No dobutamine infusion                                                                                            | t21r1 | Dobutamine infusion for 8 hours after cell therapy. Possibly a duplicate publication but protocol appears different. |        |                                                                            |       |                  |

|                |                                                                                                                                  |                                |                                                                    |                  |                                                                  |       |                                     |
|----------------|----------------------------------------------------------------------------------------------------------------------------------|--------------------------------|--------------------------------------------------------------------|------------------|------------------------------------------------------------------|-------|-------------------------------------|
| <b>t21/106</b> | Contradictory statin usage between reports                                                                                       | t21r5                          | First publication reported 94% (35/36) had been on statin therapy. | t21r11           | Subsequently 100% (195/195) had statin before and after therapy. |       |                                     |
| <b>t27/101</b> | The clinical trials number given is for an unrelated, smaller, intraMYOCARDIAL study; the paper is a larger, intraCORONARY study | t27r1<br>Methods               | "intracoronary transplantation"                                    | t27r1<br>Methods | NCT01350310                                                      | t27r3 | "Intramyocardial stem cell therapy" |
| <b>t41/101</b> | Inconsistency of whether the 44 patients were randomized or acceptor-rejecter                                                    | t41r1                          | 0 randomized, 44 acceptor-rejecter                                 | t41r3            | 44 randomized, 0 acceptor-rejecter                               |       |                                     |
| <b>t41/102</b> | Inconsistency of whether the first 20 patients were randomized or acceptor-rejecter                                              | t41r2                          | 65 randomized, 20 acceptor-rejecter                                | t41r4            | 85 randomized, 0 acceptor-rejecter                               |       |                                     |
| <b>t44/101</b> | Inconsistent number of controls                                                                                                  | t44r1<br>Abstract<br>page 1775 | n=11                                                               | t44r2            | n=10                                                             |       |                                     |
| <b>t44/102</b> | Inconsistent number of recipients                                                                                                | t44r1<br>Abstract<br>page 1775 | n=9                                                                | t44r2            | n=10                                                             |       |                                     |
| <b>t49/101</b> | Contradictory number of follow-ups                                                                                               | t49r3                          |                                                                    | 3 t49r5          |                                                                  | 2     |                                     |

|                |                                                                |       |                   |       |            |
|----------------|----------------------------------------------------------------|-------|-------------------|-------|------------|
| <b>t49/102</b> | Contradictory<br>time of second<br>follow-up<br>investigations | t49r3 | 12 Months         | t49r5 | 15 Months  |
| <b>t49/103</b> | Contradictory<br>whether<br>accepter-rejecter<br>or randomized | t49r3 | Acceptor-rejecter | t49r1 | Randomized |

---
