# Supplementary material
Source: PubMed Central journal article supplement (PMC4793657)
Supplement: nowa013617.ww2_default.pdf [file nowa013617.ww2_default.pdf]

**Appendix 2. Methods and baseline characteristics discrepancies [posted as supplied by author]**

| <b>Discrepancy ID</b> | <b>Discrepancy summary</b>                                                       | <b>Paper 1</b>   | <b>Detail from Paper 1</b>                                                                                             | <b>Paper 2</b>       | <b>Detail from Paper 2</b>                 | <b>Paper 3</b>   | <b>Detail from Paper 3</b> | <b>Paper 4</b>   | <b>Detail from Paper 4</b>                                                                                                                                                                         |
|-----------------------|----------------------------------------------------------------------------------|------------------|------------------------------------------------------------------------------------------------------------------------|----------------------|--------------------------------------------|------------------|----------------------------|------------------|----------------------------------------------------------------------------------------------------------------------------------------------------------------------------------------------------|
| <b>t01/201</b>        | Inconsistent total number of recipients                                          | t01r1<br>Table 3 | The cohorts contain 5+5+6=16. The total number of treated patients is 15 and includes 1 case of acute stent thrombosis | t01r1<br>Table 2     | All treated n=15                           | t01r1<br>Table 1 | Treated pooled n=16        | t01r1<br>Results | "One treatment group subject died soon after cell infusion from ventricular fibrillation ... Another treatment group subject was withdrawn because of acute stent thrombosis before cell infusion" |
| <b>t01/202</b>        | Apparent change of gender amongst patients in 1st 2 treatment cohorts            | t01r1<br>Table 1 | The first 10 patients were 8 men + 2 women (as the recipients were sequentially recruited to escalating doses)         | t01r2                | The first 10 patients were 9 men + 1 woman |                  |                            |                  |                                                                                                                                                                                                    |
| <b>t01/203</b>        | Percentage incompatible with ratio, for Hypertensive 15 million cells recipients | t01r1<br>Table 1 |                                                                                                                        | 20% t01r1<br>Table 1 | 1/6=16.7%                                  |                  |                            |                  |                                                                                                                                                                                                    |

|                |                                                                                                |                  |                       |           |
|----------------|------------------------------------------------------------------------------------------------|------------------|-----------------------|-----------|
| <b>t01/204</b> | Percentage incompatible with ratio, for Hypertensive pooled recipients                         | t01r1<br>Table 1 | 33% t01r1<br>Table 1  | 5/16=31%  |
| <b>t01/205</b> | Percentage incompatible with ratio, for aspirin in 15 million cells recipients                 | t01r1<br>Table 1 | 100% t01r1<br>Table 1 | 5/6=83.3% |
| <b>t01/206</b> | Percentage incompatible with ratio, for aspirin in pooled recipients                           | t01r1<br>Table 1 | 100% t01r1<br>Table 1 | 15/16=94% |
| <b>t01/207</b> | Percentage incompatible with ratio, for angiotensin antagonists in 15 million cells recipients | t01r1<br>Table 1 | 100% t01r1<br>Table 1 | 5/6=83.3% |
| <b>t01/208</b> | Percentage incompatible with ratio, for angiotensin antagonists in pooled recipients           | t01r1<br>Table 1 | 87% t01r1<br>Table 1  | 13/16=81% |

|                |                                                                                                |                  |                       |           |
|----------------|------------------------------------------------------------------------------------------------|------------------|-----------------------|-----------|
| <b>t01/209</b> | Percentage incompatible with ratio, for aldosterone antagonists in 15 million cells recipients | t01r1<br>Table 1 | 7% t01r1<br>Table 1   | 1/16=6%   |
| <b>t01/210</b> | Percentage incompatible with ratio, for beta blockers in 15 million cells recipients           | t01r1<br>Table 1 | 100% t01r1<br>Table 1 | 5/6=83.3% |
| <b>t01/211</b> | Percentage incompatible with ratio, for beta blockers in pooled recipients                     | t01r1<br>Table 1 | 100% t01r1<br>Table 1 | 15/16=94% |
| <b>t01/212</b> | Percentage incompatible with ratio, for clopidogrel in 15 million cells recipients             | t01r1<br>Table 1 | 100% t01r1<br>Table 1 | 5/6=83.3% |
| <b>t01/213</b> | Percentage incompatible with ratio, for clopidogrel in pooled recipients                       | t01r1<br>Table 1 | 100% t01r1<br>Table 1 | 15/16=94% |

|                |                                                                                         |                  |                                                       |                                  |                                                         |                                             |                                                                  |                  |                                                       |
|----------------|-----------------------------------------------------------------------------------------|------------------|-------------------------------------------------------|----------------------------------|---------------------------------------------------------|---------------------------------------------|------------------------------------------------------------------|------------------|-------------------------------------------------------|
| <b>t01/214</b> | Percentage incompatible with ratio, for statin in 15 million cells recipients           | t01r1<br>Table 1 |                                                       | 100% t01r1<br>Table 1            | 5/6=83.3%                                               |                                             |                                                                  |                  |                                                       |
| <b>t01/215</b> | Percentage incompatible with ratio, for statin in pooled recipients                     | t01r1<br>Table 1 |                                                       | 100% t01r1<br>Table 1            | 15/16=94%                                               |                                             |                                                                  |                  |                                                       |
| <b>t02/201</b> | Percentage incompatible with ratio, for beta blockers at 2-3 weeks in recipients        | t02r1<br>Table 1 |                                                       | 98% t02r1<br>Table 1             | 50/50=100%                                              |                                             |                                                                  |                  |                                                       |
| <b>t02/202</b> | Impossible % of Target vessel PCIs in recipients and percentage incompatible with ratio | t02r5<br>Table 1 | 50 patients, therefore odd percentages are impossible | t02r5<br>Table 1                 | 11% t02r5<br>Table 1                                    | 11/50=22%                                   |                                                                  |                  |                                                       |
| <b>t02/203</b> | Contradicting number of BMC recipients receiving beta-blockers at baseline              | t02r1<br>Table 1 | 50 of 50 BMC (100%) recipients received beta blockers | t02r1<br>Results section p710.e5 | All patients received beta blockers at both time points | t02r3<br>Table 1<br>and<br>t02r4<br>Table 1 | 49 of 50 (98%) BMC recipients received Beta-Blockers at Baseline | t02r2<br>Table 1 | 50 of 50 BMC (100%) recipients received beta blockers |

|                             |                                                 |                |                                                                                                                                     |       |                                                           |
|-----------------------------|-------------------------------------------------|----------------|-------------------------------------------------------------------------------------------------------------------------------------|-------|-----------------------------------------------------------|
| <b>t02/203</b><br>continued |                                                 | t02r5 page 674 | All patients were treated with beta-blockers                                                                                        | t02r6 | 50 out of 50 BMC (100%) recipients received beta blockers |
| <b>t03/201</b>              | Impossible % of recipients with NYHA Class 2    | t03r1 Table 1  | 54.6% of 11 is not an integer number of patients. Possible integer numbers of patients would be 6 (54.5%) and 7 (63.6%).            |       |                                                           |
| <b>t03/202</b>              | Impossible % of recipients on beta-blockers     | t03r1 Table 1  | 54.6% of 11 is not an integer number of patients. Possible integer numbers of patients would be 6 (54.5%) and 7 (63.6%).            |       |                                                           |
| <b>t04/201</b>              | Impossible % infarct related artery in controls | t04r1 Table 1  | 95.7% of 49 patients is not an integer number of patients. Possible integer numbers of patients would be 46 (93.9%) and 47 (95.9%). |       |                                                           |

|                |                                                             |                  |                                                                                                                                                          |
|----------------|-------------------------------------------------------------|------------------|----------------------------------------------------------------------------------------------------------------------------------------------------------|
| <b>t04/202</b> | Impossible %<br>infarct related<br>artery in<br>recipients  | t04r1<br>Table 1 | 91.8% of 52<br>patients is not an<br>integer number of<br>patients. Possible<br>integer numbers of<br>patients would be<br>47 (90.4%) and 48<br>(92.3%). |
| <b>t04/203</b> | Impossible %<br>TIMI flow 2-3<br>after PCI in<br>recipients | t04r1<br>Table 1 | 97.9% of 52<br>patients is not an<br>integer number of<br>patients. Possible<br>integer numbers of<br>patients would be<br>50 (96.2%) and 51<br>(98.1%). |
| <b>t04/204</b> | Impossible %<br>Killip class 1 or 2<br>in controls          | t04r1<br>Table 1 | 93.3% of 49<br>patients is not an<br>integer number of<br>patients. Possible<br>integer numbers of<br>patients would be<br>45 (91.8%) or 46<br>(93.9%).  |
| <b>t04/205</b> | Impossible %<br>Killip class 1 or 2<br>in recipients        | t04r1<br>Table 1 | 95.8% of 52<br>patients is not an<br>integer number of<br>patients. Possible<br>integer numbers of<br>patients would be<br>49 (94.2%) and 50<br>(96.2%). |

|                |                                                                  |               |                                                                                                                                |               |             |
|----------------|------------------------------------------------------------------|---------------|--------------------------------------------------------------------------------------------------------------------------------|---------------|-------------|
| <b>t04/206</b> | Impossible % Killip class 3 or 4 in controls                     | t04r1 Table 1 | 6.7% of 49 patients is not an integer number of patients. Possible integer numbers of patients would be 3 (6.1%) and 4 (8.2%). |               |             |
| <b>t04/207</b> | Impossible % Killip class 3 or 4 in recipients                   | t04r1 Table 1 | 4.2% of 52 patients is not an integer number of patients. Possible integer numbers of patients would be 2 (3.8%) and 3 (5.8%). |               |             |
| <b>t04/208</b> | Percentage incompatible with ratio, for controls with LVEF<30%   | t04r1 Table 1 | 85.10%                                                                                                                         | t04r1 Table 1 | 40/49=81.6% |
| <b>t04/209</b> | Percentage incompatible with ratio, for recipients with LVEF<30% | t04r1 Table 1 | 82%                                                                                                                            | t04r1 Table 1 | 41/52=78.8% |
| <b>t04/210</b> | Percentage incompatible with ratio, for controls on diuretics    | t04r1 Table 1 | 28.0%                                                                                                                          | t04r1 Table 1 | 12/43=27.9% |

|                |                                                                                                                 |                             |                                                                               |                             |                                                                                                                                                 |                                                                                       |
|----------------|-----------------------------------------------------------------------------------------------------------------|-----------------------------|-------------------------------------------------------------------------------|-----------------------------|-------------------------------------------------------------------------------------------------------------------------------------------------|---------------------------------------------------------------------------------------|
| <b>t04/211</b> | Discrepant number of recipients at 3 months follow-up                                                           | t04r1<br>Table 1            | n=47                                                                          | t04r1<br>Figure 1           | n=48                                                                                                                                            |                                                                                       |
| <b>t06/201</b> | Change in SEM of age between publications requires a patient with age above the exclusion limit of 70 years old | t06r1<br>Table 1, High dose | SEM 5 in 22 patients. Thus the SD must be at least $4.5 \cdot \sqrt{22} = 21$ | t06r3<br>Table 1, High dose | SEM 2 in 20 patients. The two patients dropped since the other publication would have had to have ages very far apart, one being >120 years old |                                                                                       |
| <b>t06/202</b> | Percentage incompatible with ratio, for controls                                                                | t06r2<br>Table 1            | 38%                                                                           | t06r2<br>Table 1            | 14/16=39%                                                                                                                                       |                                                                                       |
| <b>t06/203</b> | Percentage incompatible with ratio, for nonresponder group                                                      | t06r2<br>Table 2            | 16%                                                                           | t06r2<br>Table 1            | 4/24=17%                                                                                                                                        |                                                                                       |
| <b>t06/204</b> | Gender reclassified                                                                                             | t06r1<br>Table 1            | 22 out of 22 low-dose recipients were men                                     | t06r3<br>Table 1            | 1 of the 20 low-dose recipients selected for follow-up was a woman                                                                              |                                                                                       |
| <b>t07/201</b> | Time since infarct                                                                                              | t07r10                      | 8.5 years + 3.2 years all 391 patients                                        | t08r5                       | Describes the same study, t07r1, as having $10 \pm 3$ years (16 years maximum) after AMI in recipients                                          | t07r6<br>Chronic myocardial infarction 6 months to 8.5 years old in recipients (n=35) |



|                |                                             |        |                                                                                                                                                                                                              |                 |                                                                     |             |                   |                                                                   |
|----------------|---------------------------------------------|--------|--------------------------------------------------------------------------------------------------------------------------------------------------------------------------------------------------------------|-----------------|---------------------------------------------------------------------|-------------|-------------------|-------------------------------------------------------------------|
| <b>t07/202</b> | Number of stem cell recipients              | t07r1  | 289 t07r10                                                                                                                                                                                                   |                 | 191 t07r2                                                           |             | 231 t07r6         | 35 consecutive patients                                           |
| <b>t07/203</b> | Number of controls                          | t07r1  | 289 t07r10                                                                                                                                                                                                   |                 | 200 t07r2                                                           |             | 231 t07r6         | 20 patients (a consecutive enrolled representative control group) |
| <b>t07/204</b> | Overall number of patients                  | t07r1  | 578 t08r5                                                                                                                                                                                                    |                 | 702 t07r10                                                          |             | 391 t07r6         | 55                                                                |
| <b>t07/205</b> | Date of enrolment                           | t07r1  | 5yr follow-up by 1 Oct 2009 means cells given to 289 patients before 1 Oct 2004                                                                                                                              | t07r8           | Cells of only BMC aspirates 217 patients had been processed by 2006 |             |                   |                                                                   |
| <b>t07/206</b> | Fractional gender                           | t07r10 | 171 males (89.53%)                                                                                                                                                                                           | t07r10-ESC-2010 | >170, <171 males: 89.3% of 191                                      |             |                   |                                                                   |
| <b>t07/207</b> | 15-fold discrepancy in number of cells used | t07r1  | Mean 64 million cells, but a subgroup of n=37 received between 100-140×10 <sup>6</sup> cells, which "led to a recommendation of high cell numbers up to 160-180 × 10 <sup>6</sup> under clinical conditions" | t08r4           | 1015 cells                                                          | t07r6 t07r7 | 102 million cells | t07r10 6.6 × 10 <sup>7</sup> cells                                |

|                |                                                                                              |                 |                                                                                                                              |       |                                                                                                                                                                       |       |                                                                                                         |
|----------------|----------------------------------------------------------------------------------------------|-----------------|------------------------------------------------------------------------------------------------------------------------------|-------|-----------------------------------------------------------------------------------------------------------------------------------------------------------------------|-------|---------------------------------------------------------------------------------------------------------|
| <b>t07/208</b> | Reported that fewer chronic coronary disease patients treated, than claimed in other reports | t07r10          | Reported in 2010 that 191 patients had been treated by stem cell therapy between 2003 and 2005                               | t07r5 | Reported in 2006 that only 30 patients had been treated                                                                                                               | t07r1 | Reported in 2009 that 289 patients had been treated by stem cell therapy (no later than 30th Sept 2004) |
| <b>t07/209</b> | Probable duplicate publication but with contradictory sample size and methods                | t07r9           | Perfusion defect: baseline of $59.5 \pm 17$ , and final of $53.1 \pm 17.7$ (no dipyridamole during stem cell administration) | t07r1 | Identical baseline of $59.5 \pm 17$ , and final of $53.1 \pm 17.7$ (However very different number of patients, and dipyridamole used during stem cell administration) |       |                                                                                                         |
| <b>t07/210</b> | Contradiction of sample size                                                                 | t07r9           | 45 patients                                                                                                                  | t07r1 | 150 patients (perfusion cohort)                                                                                                                                       |       |                                                                                                         |
| <b>t07/211</b> | Fractional patients in control group                                                         | t07r4           | 89.3% of 137 patients male, i.e. >122 but <123                                                                               |       |                                                                                                                                                                       |       |                                                                                                         |
| <b>t07/212</b> | Contradiction of sample size                                                                 | t07r4           | 342 patients                                                                                                                 | t07r1 | 578 patients                                                                                                                                                          |       |                                                                                                         |
| <b>t07/213</b> | Apparently different drugs used: variation in practice or only in description?               | t07r1           | Dobutamine iv                                                                                                                | t07r9 | Dobutamine iv<br>Dipyridamole ic<br>Macroalbumin aggregates ic                                                                                                        | t07r4 | Dobutamine iv<br>Dipyridamole ic<br>Macroalbumin aggregates ic                                          |
| <b>t07/214</b> | Impossible % on ACE Inhibitor                                                                | t07r4 (Table 2) | 81% of 34 is not an integer number of patients. Could be 27 (79%) or 28 (82%)                                                |       |                                                                                                                                                                       |       |                                                                                                         |

|                |                                   |                    |                                                                                |
|----------------|-----------------------------------|--------------------|--------------------------------------------------------------------------------|
| <b>t07/215</b> | Impossible % on diuretic          | t07r4<br>(Table 2) | 95% of 34 is not an integer number of patients. Could be 32 (94%) or 33 (97%). |
| <b>t07/216</b> | Impossible % on digitalis         | t07r4<br>(Table 2) | 39% of 34 is not an integer number of patients. Could be 13 (38%) or 14 (41%). |
| <b>t07/217</b> | Impossible % on Beta Blocker      | t07r4<br>(Table 2) | 89% of 34 is not an integer number of patients. Could be 30 (88%) or 31 (91%). |
| <b>t07/218</b> | Impossible % Diabetes             | t07r4<br>(Table 2) | 7% of 34 is not an integer number of patients. Could be 2 (6%) or 3 (9%).      |
| <b>t07/219</b> | Impossible % Hyperlipoproteinemia | t07r4<br>(Table 2) | 33% of 34 is not an integer number of patients. Could be 11 (32%) or 12 (35%). |
| <b>t07/220</b> | Impossible % smokers              | t07r4<br>(Table 2) | 5% of 34 is not an integer number of patients. Could be 1 (3%) or 2 (6%).      |
| <b>t07/221</b> | Impossible % obese                | t07r4<br>(Table 2) | 52% of 34 is not an integer number of patients. Could be 17 (50%) or 18 (53%). |

|                |                                          |                    |                                                                                |
|----------------|------------------------------------------|--------------------|--------------------------------------------------------------------------------|
| <b>t07/222</b> | Impossible %<br>Arterial<br>hypertension | t07r4<br>(Table 2) | 5% of 34 is not an integer number of patients. Could be 1 (3%) or 2 (6%).      |
| <b>t07/223</b> | Impossible % on<br>ACE Inhibitor         | t07r9<br>(Table 1) | 95% of 45 is not an integer number of patients. Could be 42 (93%) or 43 (96%). |
| <b>t07/224</b> | Impossible % on<br>Beta Blocker          | t07r9<br>(Table 1) | 95% of 45 is not an integer number of patients. Could be 42 (93%) or 43 (96%). |
| <b>t07/225</b> | Impossible % on<br>ACE Inhibitor         | t07r4<br>(Table 2) | 83% of 34 is not an integer number of patients. Could be 28 (82%) or 29 (85%)  |
| <b>t07/226</b> | Impossible %<br>Hyperlipoprotein<br>emia | t07r4<br>(Table 2) | 30% of 34 is not an integer number of patients. Could be 10 (29%) or 11 (32%)  |
| <b>t07/227</b> | Impossible %<br>Smokers                  | t07r4<br>(Table 2) | 7% of 34 is not an integer number of patients. Could be 2 (6%) or 3 (9%)       |
| <b>t07/228</b> | Impossible %<br>obese                    | t07r4<br>(Table 2) | 49% of 34 is not an integer number of patients. Could be 16 (47%) or 17 (50%)  |

|                          |                                                                                   |               |                                                                                                                                                   |                                            |                                        |       |                                                                                                                      |       |                                      |
|--------------------------|-----------------------------------------------------------------------------------|---------------|---------------------------------------------------------------------------------------------------------------------------------------------------|--------------------------------------------|----------------------------------------|-------|----------------------------------------------------------------------------------------------------------------------|-------|--------------------------------------|
| <b>t08/201</b>           | Investigator mixing up own hospital's study with another with similar name?       | t08r5         | Claims "[t08r2]" recruited 64 Patients                                                                                                            | t08r7                                      | 44 patients                            | t08r2 | 20 recipients and 20 controls                                                                                        | t08r3 | t08r7 = 44; separate from t08r2 = 20 |
| <b>t08/201 continued</b> |                                                                                   | t08r1         | 27 recipients and 27 controls                                                                                                                     |                                            |                                        |       |                                                                                                                      |       |                                      |
| <b>t09/201</b>           | Impossible SEM for Killip class (which can only be 1, 2, 3 or 4) in control group | t09r3 Table 2 | SEM of Killip class for 19 controls given as 0.9 but maximum SEM (using 10 patients with Killip class 1 and 9 patients with Killip class 4)=0.4   |                                            |                                        |       |                                                                                                                      |       |                                      |
| <b>t09/202</b>           | Impossible SEM for Killip class (which can only be 1, 2, 3 or 4) in recipients    | t09r3 Table 2 | SEM of Killip class for 19 recipients given as 0.6 but maximum SEM (using 10 patients with Killip class 1 and 9 patients with Killip class 4)=0.4 |                                            |                                        |       |                                                                                                                      |       |                                      |
| <b>t10/201</b>           | Medically impossible NYHA in excluded recipient                                   | t10r1 Table 1 | 35 patients: 22 class II and 13 class III patients gives a mean of 2.37                                                                           | t10r1 p1534 NYHA Functional Classification | Baseline NYHA for 34 recipients is 2.6 |       | The excluded patient must have had (with best-case rounding) NYHA=(22*2+13*3)-2.55*34= -3.7 This is a negative NYHA. |       |                                      |

|                |                                                                    |                    |                             |                      |                                  |       |
|----------------|--------------------------------------------------------------------|--------------------|-----------------------------|----------------------|----------------------------------|-------|
| <b>t12/201</b> | Inconsistent direction of rounding of 0.5                          | t12r2<br>Table 1   | 31/40=77.5%<br>given as 77% | t12r2<br>Table 1     | 1/40=2.5% given<br>as 3%         |       |
| <b>t12/202</b> | Inconsistent direction of rounding of 0.5                          | t12r2<br>Table 1   | 27/40=67.5%<br>given as 67% | t12r2<br>Table 1     | 1/40=2.5% given<br>as 3%         |       |
| <b>t12/203</b> | Inconsistent direction of rounding of 0.5                          | t12r2<br>Table 1   | 1/40=2.5% given<br>as 2%    | t12r2<br>Table 1     | 1/40=2.5% given<br>as 3%         |       |
| <b>t12/204</b> | Inconsistent direction of rounding of 0.5                          | t12r2<br>Table 1   | 1/40=2.5% given<br>as 2%    | t12r2<br>Table 1     | 1/40=2.5% given<br>as 3%         |       |
| <b>t12/205</b> | Inconsistent direction of rounding of 0.5                          | t12r2<br>Table 1   | 25/40=62.5%<br>given as 62% | t12r2<br>Table 1     | 1/40=2.5% given<br>as 3%         |       |
| <b>t13/201</b> | Discrepancy in number of recipients with NYHA class IV at baseline | t13r2<br>(Table 1) |                             | 0 t13r1<br>(page 18) | At least 1<br>t13r1<br>(page 15) | 0     |
| <b>t13/202</b> | Discrepancy in number of recipients with CCS class IV at baseline  | t13r2<br>(Table 1) | 1 (1.85%)                   | t13r1<br>(page 19)   |                                  | 0     |
| <b>t13/203</b> | Discrepancy in number of recipients with CCS class I at baseline   | t13r2<br>(Table 1) | 13 (24.07%)                 | t13r1<br>(page 19)   |                                  | 0.109 |

|                |                                                                    |                    |             |                    |       |
|----------------|--------------------------------------------------------------------|--------------------|-------------|--------------------|-------|
| <b>t13/204</b> | Discrepancy in number of recipients with CCS class III at baseline | t13r2<br>(Table 1) | 16 (29.63%) | t13r1<br>(page 19) | 0.4   |
| <b>t13/205</b> | Discrepancy in number of recipients with CCS class II at baseline  | t13r2<br>(Table 1) | 24 (44.44%) | t13r1<br>(page 19) | 0.491 |
| <b>t13/206</b> | Discrepancy in number of controls with CCS class I at baseline     | t13r2<br>(Table 1) | 10 (40%)    | t13r1<br>(page 19) | 0.067 |
| <b>t13/207</b> | Discrepancy in number of controls with CCS class II at baseline    | t13r2<br>(Table 1) | 10 (40%)    | t13r1<br>(page 19) | 0.467 |
| <b>t13/208</b> | Discrepancy in number of controls with CCS class III at baseline   | t13r2<br>(Table 1) | 5 (20%)     | t13r1<br>(page 19) | 0.467 |
| <b>t13/209</b> | Discrepancy in number of controls with NYHA class I at baseline    | t13r2<br>(Table 1) | 2 (6.45%)   | t13r1<br>(page 18) | 0.409 |

|                |                                                                                         |                  |             |                                                                                              |                                                             |                                                                                           |
|----------------|-----------------------------------------------------------------------------------------|------------------|-------------|----------------------------------------------------------------------------------------------|-------------------------------------------------------------|-------------------------------------------------------------------------------------------|
| <b>t13/210</b> | Discrepancy in number of controls with NYHA class II at baseline                        | t13r2 (Table 1)  | 14 (45.16%) | t13r1 (page 18)                                                                              | 0.409                                                       |                                                                                           |
| <b>t13/211</b> | Discrepancy in number of controls with NYHA class III at baseline                       | t13r2 (Table 1)  | 15 (48.39%) | t13r1 (page 18)                                                                              | 0.182                                                       | t13r2 (Text "...and 47% of patients in the placebo group were NYHA class III at baseline" |
| <b>t13/212</b> | Discrepancy in number of recipients with NYHA class I at baseline                       | t13r2 (Table 1)  | 6 (9.84%)   | t13r1 (page 18)                                                                              | 0.181                                                       |                                                                                           |
| <b>t13/213</b> | Discrepancy in number of recipients with NYHA class III at baseline                     | t13r2 (Table 1)  | 23 (37.70%) | t13r2 (Text "Forty percent of patients in the BMC group"..."were NYHA class III at baseline" |                                                             |                                                                                           |
| <b>t13/220</b> | Discrepancy in number of recipients with SPECT reversible defect assessment at 6 months | t13r2 (Figure 2) | 52 patients | t13r2 (Figure 1)                                                                             | 50 patients "assessed changes in perfusion defect by SPECT" | t13r3 (Study Results) 50 Patients                                                         |



|                          |                                                                                      |                                                                                             |                |                                                                                             |                                            |                   |
|--------------------------|--------------------------------------------------------------------------------------|---------------------------------------------------------------------------------------------|----------------|---------------------------------------------------------------------------------------------|--------------------------------------------|-------------------|
| <b>t13/221</b>           | Discrepancy in number of patients that had an implanTable cardioverter-defibrillator | t13r2 (Text page 1719) "Most (76%) patients had an implanTable cardioverter-defibrillator." | t13r2 (Table2) | 3 recipients (4.92%) and 2 controls (6.45%) had an "ImplanTable cardioverter-defibrillator" |                                            |                   |
| <b>t16/201</b>           | Subgroups incompatible with size of whole group                                      | t16r1 Page 4/3/12 with 1/2/3 vessel disease                                                 | t16r1 Page 10  | n=20                                                                                        |                                            |                   |
| <b>t16/202</b>           | Subgroups incompatible with size of whole group                                      | t16r1 Page 6/5/7 with 1/2/3 vessel disease                                                  | t16r1 Page 10  | n=19                                                                                        |                                            |                   |
| <b>t16/203</b>           | Discrepancy in the number of patients assigned to the high-dose shock wave group     | t16r1 page 11 40 patients                                                                   | t16r4          | 43 patients                                                                                 | t16r2-2012 p.47 40 out of the 103 patients | t16r3 43 patients |
| <b>t16/203 continued</b> |                                                                                      | t16r5 40 patients Figure 1                                                                  |                |                                                                                             |                                            |                   |
| <b>t16/204</b>           | Discrepancy in the number of patients assigned to the low-dose shock wave group      | t16r1 page 11 42 patients                                                                   | t16r4          | 39 patients                                                                                 | t16r2-2012 p.47 40 out of the 103 patients | t16r3 39 patients |
| <b>t16/204 continued</b> |                                                                                      | t16r5 42 patients Figure 1                                                                  |                |                                                                                             |                                            |                   |

|                |                                                                                                  |                  |                      |           |
|----------------|--------------------------------------------------------------------------------------------------|------------------|----------------------|-----------|
| <b>t16/205</b> | Percentage incompatible with ratio, for men in low-dose shock wave recipients                    | t16r5<br>Table 1 | 77% t16r5<br>Table 1 | 17/21=81% |
| <b>t16/206</b> | Percentage incompatible with ratio, for hypertension in low-dose shock wave recipients           | t16r5<br>Table 1 | 77% t16r5<br>Table 1 | 17/21=81% |
| <b>t16/207</b> | Percentage incompatible with ratio, for diabetes in low-dose shock wave recipients               | t16r5<br>Table 1 | 50% t16r5<br>Table 1 | 11/21=52% |
| <b>t16/208</b> | Percentage incompatible with ratio, for smoking in low-dose shock wave recipients                | t16r5<br>Table 1 | 64% t16r5<br>Table 1 | 14/21=67% |
| <b>t16/209</b> | Percentage incompatible with ratio, for hypercholesterol aemia in low-dose shock wave recipients | t16r5<br>Table 1 | 77% t16r5<br>Table 1 | 17/21=81% |

|                |                                                                                                         |                  |        |                       |            |
|----------------|---------------------------------------------------------------------------------------------------------|------------------|--------|-----------------------|------------|
| <b>t16/210</b> | Subgroups incompatible with size of whole group for low-dose shock wave recipients, for NYHA class      | t16r5<br>Table 1 | 1/13/8 | t16r5<br>Table 1      | n=21       |
| <b>t16/211</b> | Percentage incompatible with ratio, for previous bypass surgery in low-dose shock wave recipients       | t16r5<br>Table 1 |        | 18% t16r5<br>Table 1  | 4/21=19%   |
| <b>t16/212</b> | Percentage incompatible with ratio, for antiplatelet therapy in low-dose shock wave recipients          | t16r5<br>Table 1 |        | 100% t16r5<br>Table 1 | 22/21=104% |
| <b>t16/213</b> | Percentage incompatible with ratio, for angiotensin receptor blockers in low-dose shock wave recipients | t16r5<br>Table 1 |        | 91% t16r5<br>Table 1  | 20/21=95%  |

|                |                                                                                                   |                  |                      |            |
|----------------|---------------------------------------------------------------------------------------------------|------------------|----------------------|------------|
| <b>t16/214</b> | Percentage incompatible with ratio, for beta blockers in low-dose shock wave recipients           | t16r5<br>Table 1 | 82% t16r5<br>Table 1 | 8/21=38%   |
| <b>t16/215</b> | Percentage incompatible with ratio, for statins in low-dose shock wave recipients                 | t16r5<br>Table 1 | 96% t16r5<br>Table 1 | 21/21=100% |
| <b>t16/216</b> | Percentage incompatible with ratio, for aldosterone antagonists in low-dose shock wave recipients | t16r5<br>Table 1 | 55% t16r5<br>Table 1 | 12/21=57%  |
| <b>t16/217</b> | Percentage incompatible with ratio, for diuretics in low-dose shock wave recipients               | t16r5<br>Table 1 | 77% t16r5<br>Table 1 | 17/21=81%  |
| <b>t16/218</b> | Percentage incompatible with ratio, for digitalis in low-dose shock wave recipients               | t16r5<br>Table 1 | 27% t16r5<br>Table 1 | 6/21=29%   |

|                |                                                                                                                    |                  |       |                      |           |
|----------------|--------------------------------------------------------------------------------------------------------------------|------------------|-------|----------------------|-----------|
| <b>t16/219</b> | Percentage incompatible with ratio, for pacemaker/ICDs in low-dose shock wave recipients                           | t16r5<br>Table 1 |       | 36% t16r5<br>Table 1 | 8/21=38%  |
| <b>t16/220</b> | Percentage incompatible with ratio, for cardiac resynchronization therapy in low-dose shock wave recipients        | t16r5<br>Table 1 |       | 9% t16r5<br>Table 1  | 2/21=10%  |
| <b>t16/221</b> | Subgroups incompatible with size of whole group for low-dose shock wave recipients, for number of diseased vessels | t16r5<br>Table 1 | 9/7/6 | t16r5<br>Table 1     | n=21      |
| <b>t19/201</b> | Percentage incompatible with ratio, for hypertensive recipients                                                    | t19r1<br>Table 1 |       | 44% t19r1<br>Table 1 | 10/23=43% |
| <b>t19/202</b> | Percentage incompatible with ratio, for smoking recipients                                                         | t19r1<br>Table 1 |       | 44% t19r1<br>Table 1 | 10/23=43% |

|                          |                                                         |                      |                                                                             |                  |                                   |        |                      |        |             |
|--------------------------|---------------------------------------------------------|----------------------|-----------------------------------------------------------------------------|------------------|-----------------------------------|--------|----------------------|--------|-------------|
| <b>t19/203</b>           | Percentage incompatible with ratio, for male controls   | t19r1<br>Table 1     | 90%                                                                         | t19r1<br>Table 1 | 17/19=89%                         |        |                      |        |             |
| <b>t21/201</b>           | Number of patients                                      | t21r5                | 36                                                                          | t21r4            | 35                                | t21r7  | 36                   | t21r11 | 195         |
| <b>t21/201 continued</b> |                                                         | t21r10               | 195                                                                         |                  |                                   |        |                      |        |             |
| <b>t21/202</b>           | Single or multicentre                                   | t21r5                | Single-centre, Düsseldorf                                                   | t08r4            | MULTICENTRE: "Multizenterstudien" |        |                      |        |             |
| <b>t21/203</b>           | Reclassification of sex?                                | t21r5                | All 18 male                                                                 | t21r3            | 17 male + 1 female                | t21r11 | 123 male + 27 female | t21r7  | All 18 male |
| <b>t21/204</b>           | Neuter subjects                                         | t21r8                | 12 recipients (9 male and 1 female)<br>12 controls (8 male and 1 female)    |                  |                                   |        |                      |        |             |
| <b>t21/205</b>           | VO2 means different but SDs same, and still rise by 11% | t21r5                | 1602±533 and 1776±523                                                       | t21r11           | 1465±533 and 1630±523             |        |                      |        |             |
| <b>t21/206</b>           | Many CPK means are 1000 apart ...                       | t21r5                | 1504 and 1489                                                               | t21r11           | 2504 and 2489                     |        |                      |        |             |
| <b>t21/206 continued</b> | ... but SDs are identical                               | t21r5                | 979 and 952                                                                 | t21r11           | 979 and 952                       |        |                      |        |             |
| <b>t21/207</b>           | Impossible % diabetes                                   | t21r6 (AMI patients) | 10% of 13 is not an integer number of patients. Could be 1 (8%) or 2 (15%). |                  |                                   |        |                      |        |             |

|                |                                                 |                      |                                                                                |           |    |
|----------------|-------------------------------------------------|----------------------|--------------------------------------------------------------------------------|-----------|----|
| <b>t21/208</b> | Impossible % hypertension                       | t21r6 (AMI)          | 88% of 13 is not an integer number of patients. Could be 11 (85%) or 12 (92%). |           |    |
| <b>t21/209</b> | Impossible % hyperlipidemia                     | t21r6 (AMI)          | 65% of 13 is not an integer number of patients. Could be 8 (62%) or 9 (69%).   |           |    |
| <b>t21/210</b> | Impossible % smoking                            | t21r6 (AMI patients) | 86% of 12 is not an integer number of patients. Could be 10 (83%) or 11 (92%). |           |    |
| <b>t21/211</b> | Impossible % Positive Family History            | t21r6 (CIHD)         | 20% of 32 is not an integer number of patients. Could be 6 (19%) or 7 (22%).   |           |    |
| <b>t21/212</b> | Contradictory sample size but identical results | t21r11               |                                                                                | 195 t21r2 | 50 |
| <b>t21/213</b> | Impossible % diabetes                           | t21r6 (AMI patients) | 15% of 12 is not an integer number of patients. Could be 1 (8%) or 2 (17%).    |           |    |
| <b>t21/214</b> | Impossible % diabetes                           | t21r5                | 16% of 18 is not an integer number of patients. Could be 2 (11%) or 3 (17%).   |           |    |

|                |                             |                       |                                                                                 |
|----------------|-----------------------------|-----------------------|---------------------------------------------------------------------------------|
| <b>t21/215</b> | Impossible % diabetes       | t21r6 (CIHD patients) | 15% of 32 is not an integer number of patients. Could be 4 (13%) or 5 (16%).    |
| <b>t21/216</b> | Impossible % diabetes       | t21r6 (CIHD patients) | 13% of 12 is not an integer number of patients. Could be 1 (8%) or 2 (17%).     |
| <b>t21/217</b> | Impossible % hypertension   | t21r6 (AMI)           | 90% of 12 is not an integer number of patients. Could be 10 (83%) or 11 (92%).  |
| <b>t21/218</b> | Impossible % hypertension   | t21r6 (CIHD patients) | 95% of 12 is not an integer number of patients. Could be 11 (92%) or 12 (100%). |
| <b>t21/219</b> | Impossible % hyperlipidemia | t21r6 (AMI)           | 60% of 12 is not an integer number of patients. Could be 7 (58%) or 8 (67%).    |
| <b>t21/220</b> | Impossible % hyperlipidemia | t21r6 (CIHD)          | 87% of 12 is not an integer number of patients. Could be 10 (83%) or 11 (92%).  |



|                |                                                                                    |                     |     |                         |                   |
|----------------|------------------------------------------------------------------------------------|---------------------|-----|-------------------------|-------------------|
| <b>t22/201</b> | Percentage incompatible with number of patients, for sex in recipients             | t22r1 Table 1, p164 | 66% | t22r1 Table 1, p164     | 10 or 16 patients |
| <b>t22/202</b> | Percentage incompatible with number of patients, for diabetes in recipients        | t22r1 Table 1, p164 |     | 33% t22r1 Table 1, p164 | 10 or 16 patients |
| <b>t22/203</b> | Percentage incompatible with number of patients, for hyperlipidaemia in recipients | t22r1 Table 1, p164 |     | 33% t22r1 Table 1, p164 | 10 or 16 patients |
| <b>t22/204</b> | Percentage incompatible with number of patients, for hypertension in recipients    | t22r1 Table 1, p164 |     | 33% t22r1 Table 1, p164 | 10 or 16 patients |
| <b>t22/205</b> | Percentage incompatible with number of patients, for smoking in recipients         | t22r1 Table 1, p164 |     | 32% t22r1 Table 1, p164 | 10 or 16 patients |

|                |                                                                           |                        |                                                                   |                                    |                                                                                                |                        |                                              |                           |                                               |
|----------------|---------------------------------------------------------------------------|------------------------|-------------------------------------------------------------------|------------------------------------|------------------------------------------------------------------------------------------------|------------------------|----------------------------------------------|---------------------------|-----------------------------------------------|
| <b>t22/206</b> | Percentage of controls do not fit with a consistent number of patients    | t22r1<br>Table 1, p164 | 90%, 25%, 40%, 40%                                                | t22r1<br>Table 1, p164             | 10 or 16 patients                                                                              |                        |                                              |                           |                                               |
| <b>t22/207</b> | Inconsistent reports of numbers in each arm                               | t22r1<br>Abstract      | "control or bone marrow cell groups (each including 16 patients)" | t22r1<br>Methods, p163             | "20 had the inclusion criteria and were randomly allocated in a 1:1 ratio" so 10 in each group | t22r1<br>Table 1, p164 | "control group, n=16" and "case group, n=16" | t22r1<br>Discussion, p165 | "bone marrow were aspirated from 10 patients" |
| <b>t25/201</b> | Percentage incompatible with ratio, for beta blockers in controls         | t25r1<br>Table 1       | 93%                                                               | t25r1<br>Table 1 stated percentage | 15/16=94%                                                                                      |                        |                                              |                           |                                               |
| <b>t25/202</b> | Percentage incompatible with ratio, for beta blockers in recipients       | t25r1<br>Table 1       | 93%                                                               | t25r1<br>Table 1 stated percentage | 15/16=94%                                                                                      |                        |                                              |                           |                                               |
| <b>t25/203</b> | Percentage incompatible with ratio, for prior history of MI in recipients | t25r1<br>Table 1       | 75%                                                               | t25r1<br>Table 1 stated percentage | 11/16=69%                                                                                      |                        |                                              |                           |                                               |
| <b>t26/201</b> | Discrepant age of patients between reports                                | t26r2<br>Table 1       | 55.8                                                              | t26r1<br>Table 1                   | 55                                                                                             |                        |                                              |                           |                                               |

|                |                                                                                            |                  |                                                                                         |                  |                             |
|----------------|--------------------------------------------------------------------------------------------|------------------|-----------------------------------------------------------------------------------------|------------------|-----------------------------|
| <b>t26/202</b> | Percentage incompatible with ratio, for recipients who are current smokers                 | t26r2<br>Table 1 | 51%                                                                                     | t26r2<br>Table 1 | 17/33=52%                   |
| <b>t27/201</b> | Subgroup means incompatible with whole group mean for LVEF even allowing for rounding      | t27r1<br>Table 1 | 55 recipients with mean 24.3 and 55 controls with mean 25.7, giving overall mean 25     | t27r1<br>Table 1 | 110 patients with mean 25.2 |
| <b>t27/202</b> | Subgroup means incompatible with whole group mean for sodium even allowing for rounding    | t27r1<br>Table 1 | 55 recipients with 138 and 55 controls with mean 136, giving overall mean 137           | t27r1<br>Table 1 | 110 patients with mean 136  |
| <b>t27/203</b> | Subgroup means incompatible with whole group mean for NT-proBNP even allowing for rounding | t27r1<br>Table 1 | 55 recipients with mean 2322 and 55 controls with mean 2431, giving overall mean 2376.5 | t27r1<br>Table 1 | 110 patients with mean 2390 |

|                |                                                                                            |               |                                                                                          |               |                            |
|----------------|--------------------------------------------------------------------------------------------|---------------|------------------------------------------------------------------------------------------|---------------|----------------------------|
| <b>t27/204</b> | Subgroups incompatible with whole group, for male gender                                   | t27r2 Table 1 | 26 male recipients and 23 male controls                                                  | t27r2 Table 1 | 27 male patients           |
| <b>t27/205</b> | Percentage incompatible with ratio, for male gender                                        | t27r2 Table 1 | 79%                                                                                      | t27r2 Table 1 | 27/55=49%                  |
| <b>t27/206</b> | Subgroup means incompatible with whole group mean for LVEF even allowing for rounding      | t27r2 Table 1 | 28 recipients with mean 25.6 and 27 controls with mean 26.7, giving overall mean 26.1    | t27r2 Table 1 | 55 patients with mean 25.9 |
| <b>t27/207</b> | Subgroup means incompatible with whole group mean for sodium even allowing for rounding    | t27r2 Table 1 | 28 recipients with mean 139 and 27 controls with mean of 136, giving overall mean 138    | t27r2 Table 1 | 55 patients with mean 136  |
| <b>t27/208</b> | Subgroup means incompatible with whole group mean for NT-proBNP even allowing for rounding | t27r2 Table 1 | 28 recipients with mean 2069 and 27 controls with mean of 2531, giving overall mean 2296 | t27r2 Table 1 | 55 patients with mean 2290 |

|                |                                                                                                                             |                                                                                                   |                  |                               |
|----------------|-----------------------------------------------------------------------------------------------------------------------------|---------------------------------------------------------------------------------------------------|------------------|-------------------------------|
| <b>t27/209</b> | Subgroup means t27r2<br>incompatible Table 1<br>with whole group<br>mean for TNF-<br>alpha even<br>allowing for<br>rounding | 28 recipients with<br>mean 4.62 and 27<br>patients with mean<br>4.02, giving overall<br>mean 4.33 | t27r2<br>Table 1 | 55 patients with<br>mean 4.21 |
| <b>t27/210</b> | Subgroup means t27r2<br>incompatible Table 1<br>with whole group<br>mean for IL-6<br>even allowing for<br>rounding          | 28 recipients with<br>mean 3.96 and 27<br>controls with mean<br>4.12, giving overall<br>mean 4.04 | t27r2<br>Table 1 | 55 patients with<br>mean 4.06 |
| <b>t27/211</b> | Subgroup means t27r2<br>incompatible Table 1<br>with whole group<br>mean for QTc<br>even allowing for<br>rounding           | 28 recipients with<br>mean 475 and 27<br>controls with mean<br>481, giving overall<br>mean 478    | t27r2<br>Table 1 | 55 patients with<br>mean 479  |
| <b>t28/201</b> | Percentage t28r2<br>incompatible Table 1<br>with ratio, for<br>controls with<br>diabetes                                    | 20.30%                                                                                            | t28r2<br>Table 1 | 5/24=20.8%                    |
| <b>t28/202</b> | Conflicting t28r2<br>average time Abstract<br>Holter monitoring<br>performed                                                | "on average 6 days<br>after MI"                                                                   | t28r1            | "on average 5<br>days"        |

|                |                                        |               |                                                                                       |
|----------------|----------------------------------------|---------------|---------------------------------------------------------------------------------------|
| <b>t31/201</b> | Impossible % controls on ACEI          | t31r1 Table 1 | 65.9% of 93 is not an integer number of patients. Could be 60 (64.5%) and 61 (65.6%). |
| <b>t31/202</b> | Impossible % recipients on ACEI        | t31r1 Table 1 | 66% of 90 is not an integer number of patients. Could be 59 (65.6%) and 60 (66.7%)    |
| <b>t31/203</b> | Impossible % controls on ARB           | t31r1 Table 1 | 24.2% of 93 is not an integer number of patients. Could be 22 (23.7%) and 23 (24.7%). |
| <b>t31/204</b> | Impossible % recipients on ARB         | t31r1 Table 1 | 22.3% of 90 is not an integer number of patients. Could be 20 (22.2%) and 21 (23.3%). |
| <b>t31/205</b> | Impossible % controls on Hydralazine   | t31r1 Table 1 | 4.4% of 93 is not an integer number of patients. Could be 4 (4.3%) and 5 (5.4%).      |
| <b>t31/206</b> | Impossible % recipients on Hydralazine | t31r1 Table 1 | 5.3% of 90 is not an integer number of patients. Could be 4 (4.4%) and 5 (5.6%).      |

|                |                                           |                  |                                                                                                                            |
|----------------|-------------------------------------------|------------------|----------------------------------------------------------------------------------------------------------------------------|
| <b>t31/207</b> | Impossible % controls on Furosemide       | t31r1<br>Table 1 | 89.0% of 93 is not an integer number of patients. Could be 82 (88.2%) and 83 (89.2%).                                      |
| <b>t31/208</b> | Impossible % recipients on Furosemide     | t31r1<br>Table 1 | 92.6% of 90 is not an integer number of patients. Possible integer numbers of patients would be 83 (92.2%) and 84 (93.3%). |
| <b>t31/209</b> | Impossible % controls on Spironolactone   | t31r1<br>Table 1 | 86.8% of 93 is not an integer number of patients. Possible integer numbers of patients would be 80 (86.0%) and 81 (87.1%). |
| <b>t31/210</b> | Impossible % recipients on Spironolactone | t31r1<br>Table 1 | 91.5% of 90 is not an integer number of patients. Possible integer numbers of patients would be 82 (91.1%) and 83 (92.2%). |

|                |                                                |               |                                                                                                                                     |
|----------------|------------------------------------------------|---------------|-------------------------------------------------------------------------------------------------------------------------------------|
| <b>t31/211</b> | Impossible % controls on Hydrochlorothiazide   | t31r1 Table 1 | 27.5% of 93 patients is not an integer number of patients. Possible integer numbers of patients would be 25 (26.9%) and 26 (28.0%). |
| <b>t31/212</b> | Impossible % recipients on Hydrochlorothiazide | t31r1 Table 1 | 28.7% of 90 patients is not an integer number of patients. Possible integer numbers of patients would be 25 (27.8%) and 26 (28.9%). |
| <b>t31/213</b> | Impossible % controls on Digoxin               | t31r1 Table 1 | 72.5% of 93 patients is not an integer number of patients. Possible integer numbers of patients would be 67 (72.0%) and 68 (73.1%). |
| <b>t31/214</b> | Impossible % recipients on Digoxin             | t31r1 Table 1 | 62.8% of 90 patients is not an integer number of patients. Possible integer numbers of patients would be 56 (62.2%) and 57 (63.3%). |



|                |                                              |                  |                                                                                                                                     |
|----------------|----------------------------------------------|------------------|-------------------------------------------------------------------------------------------------------------------------------------|
| <b>t31/215</b> | Impossible % recipients on Amiodarone        | t31r1<br>Table 1 | 57.4% of 90 patients is not an integer number of patients. Possible integer numbers of patients would be 51 (56.7%) and 52 (57.8%). |
| <b>t31/216</b> | Impossible % controls on Carvedilol          | t31r1<br>Table 1 | 65.9% of 93 patients is not an integer number of patients. Possible integer numbers of patients would be 61 (65.6%) and 62 (66.7%). |
| <b>t31/217</b> | Impossible % recipients on Carvedilol        | t31r1<br>Table 1 | 69.1% of 90 patients is not an integer number of patients. Possible integer numbers of patients would be 62 (68.9%) and 63 (70%).   |
| <b>t31/218</b> | Impossible % controls on other beta blockers | t31r1<br>Table 1 | 6.6% of 93 patients is not an integer number of patients. Possible integer numbers of patients would be 6 (6.5%) and 7 (7.5%).      |

|                |                                                                             |                  |                                                                                                                                |                    |  |           |
|----------------|-----------------------------------------------------------------------------|------------------|--------------------------------------------------------------------------------------------------------------------------------|--------------------|--|-----------|
| <b>t31/219</b> | Impossible % recipients on other beta blockers                              | t31r1<br>Table 1 | 3.2% of 90 patients is not an integer number of patients. Possible integer numbers of patients would be 2 (2.2%) and 3 (3.3%). |                    |  |           |
| <b>t32/201</b> | Discrepant average baseline EF by LV-gram                                   | t32r1<br>Table 3 | $((35.2*30)+(36.5*10))/40=35.5$                                                                                                | t32r1 text<br>p430 |  | 35.7      |
| <b>t32/202</b> | Discrepant average baseline EF by echo                                      | t32r1<br>Table 3 | $((38.9*30)+(37.4*10))/40=38.5$                                                                                                | t32r1 text<br>p430 |  | 38.7      |
| <b>t34/201</b> | Percentage incompatible with ratio, for controls with single vessel disease | t34r3<br>Table 1 | 5%                                                                                                                             | t34r3<br>Table 1   |  | 3/54=6%   |
| <b>t34/202</b> | Percentage incompatible with ratio, for controls with 2 vessel disease      | t34r3<br>Table 1 | 5%                                                                                                                             | t34r3<br>Table 1   |  | 3/54=6%   |
| <b>t34/203</b> | Percentage incompatible with ratio, for controls with 3 vessel disease      | t34r3<br>Table 1 | 90%                                                                                                                            | t34r3<br>Table 1   |  | 48/54=89% |

|                |                                                                               |                  |                                                                                                                                              |           |
|----------------|-------------------------------------------------------------------------------|------------------|----------------------------------------------------------------------------------------------------------------------------------------------|-----------|
| <b>t34/204</b> | Percentage incompatible with ratio, for recipients with single vessel disease | t34r3<br>Table 1 | 3% t34r3<br>Table 1                                                                                                                          | 2/55=4%   |
| <b>t34/205</b> | Percentage incompatible with ratio, for controls who had previous PCI         | t34r3<br>Table 1 | 29% t34r3<br>Table 1                                                                                                                         | 16/54=30% |
| <b>t34/206</b> | Impossible baseline NYHA class in controls                                    | t34r3<br>Table 1 | No combination of integer values can produce a mean that can be rounded to 3.5 whilst having a standard deviation that can be rounded to 0.1 |           |
| <b>t34/207</b> | Impossible baseline NYHA class in recipients                                  | t34r3<br>Table 1 | No combination of integer values can produce a mean that can be rounded to 3.3 whilst having a standard deviation that can be rounded to 0.2 |           |

|                |                                                                                                                  |                |                                                                                                                                                                                                                                                                         |       |                                                                                                                                        |
|----------------|------------------------------------------------------------------------------------------------------------------|----------------|-------------------------------------------------------------------------------------------------------------------------------------------------------------------------------------------------------------------------------------------------------------------------|-------|----------------------------------------------------------------------------------------------------------------------------------------|
| <b>t35/201</b> | Method of injecting cells into the septum with a 3-5 mm long needle and diagnostic transducer outside the heart. | t35r1<br>p1637 | "Author: There were injections into the septum, as I described in the article, but these were actually left side of the heart catheterizations. Therefore that is why I said the septum that is biopsied is from the left side of the heart, where the injections are." | t35r1 | "Questioner: So epicardially you injected cells into the septum. How was that done?<br>Author: With transesophageal echocardiography." |
| <b>t35/202</b> | Injections limited to 5 mm from external surface of heart, yet also covered the septum                           | t35r1<br>p1633 | "Author: The injections were 3 to 5 mm in depth"                                                                                                                                                                                                                        | t35r1 | "Author: There were injections into the septum, as I described in the article"                                                         |

t35/203

Confusion  
whether control  
group underwent  
marrow harvest

t35r1  
p1632

Only recipients  
underwent harvest:  
"Patients in the  
OPCAB-only group  
had a standard  
sternotomy and  
OPCAB performed  
with both apical  
suction and  
pressure stabili-  
zation of the heart  
(Guidant Corp).  
Patients in the  
stem cell therapy  
group were placed  
prone, and bone  
marrow was  
harvested from the  
iliac bone in a  
sterile fashion after  
achievement of  
general anes-  
thesia. "

t35r1  
p1637

Both groups  
underwent harvest:  
"Questioner: Are  
you saying that  
these patients  
were blinded to  
their treatment  
group?  
Author: Yes.  
Questioner:  
Therefore the  
patients who did  
not have stem cells  
injected still had a  
bone marrow  
aspirate?  
Author: They had  
an aspirate that  
was just frozen."

t35/204

Confusion on  
whether control  
group underwent  
any injections

t35r1  
p1632

Only recipients are  
described as  
having undergone  
injections.

t35r3 Time  
22:00 to  
23:00

Controls definitely  
received saline  
injections

|                |                                                                                                      |                                              |                                |                                              |                                                                                                                         |
|----------------|------------------------------------------------------------------------------------------------------|----------------------------------------------|--------------------------------|----------------------------------------------|-------------------------------------------------------------------------------------------------------------------------|
| <b>t38/201</b> | Discrepancy between total number of injections performed and average number of injection per patient | t38r1 Abstract - Methods and Results section | Total number of infusions: 422 | t38r1 Abstract - Methods and Results section | Average number of injection per patient: 14.6 (total number of patients: 28) => 408.8 injections and not 422 injections |
| <b>t38/202</b> | Percentage incompatible with ratio, for male controls                                                | t38r1 Table 1 page 3001                      | 88%                            | t38r1 Table 1 page 3001                      | 7/9=77%                                                                                                                 |
| <b>t38/203</b> | Percentage incompatible with ratio, for controls with diabetes mellitus                              | t38r1 Table 1 page 3001                      | 63%                            | t38r1 Table 1 page 3001                      | 5/9=56%                                                                                                                 |
| <b>t38/204</b> | Percentage incompatible with ratio, for controls with hypertension                                   | t38r1 Table 1 page 3001                      | 75%                            | t38r1 Table 1 page 3001                      | 6/9=67%                                                                                                                 |
| <b>t38/205</b> | Percentage incompatible with ratio, for controls who are current smokers                             | t38r1 Table 1 page 3001                      | 50%                            | t38r1 Table 1 page 3001                      | 4/9=44%                                                                                                                 |
| <b>t38/206</b> | Percentage incompatible with ratio, for controls with percutaneous coronary intervention             | t38r1 Table 1 page 3001                      | 88%                            | t38r1 Table 1 page 3001                      | 7/9=78%                                                                                                                 |

|                |                                                                                            |                               |                                   |         |
|----------------|--------------------------------------------------------------------------------------------|-------------------------------|-----------------------------------|---------|
| <b>t38/207</b> | Percentage incompatible with ratio, for controls with coronary artery bypass surgery       | t38r1<br>Table 1<br>page 3001 | 63% t38r1<br>Table 1<br>page 3001 | 5/9=56% |
| <b>t38/208</b> | Percentage incompatible with ratio, for controls with ACEi or ARB at baseline              | t38r1<br>Table 1<br>page 3001 | 50% t38r1<br>Table 1<br>page 3001 | 4/9=44% |
| <b>t38/209</b> | Percentage incompatible with ratio, for controls with beta blockers at baseline            | t38r1<br>Table 1<br>page 3001 | 88% t38r1<br>Table 1<br>page 3001 | 7/9=78% |
| <b>t38/210</b> | Percentage incompatible with ratio, for controls with calcium channel blockers at baseline | t38r1<br>Table 1<br>page 3001 | 50% t38r1<br>Table 1<br>page 3001 | 4/9=44% |
| <b>t38/211</b> | Percentage incompatible with ratio, for controls with nitrates at baseline                 | t38r1<br>Table 1<br>page 3001 | 50% t38r1<br>Table 1<br>page 3001 | 4/9=44% |

|                |                                                                                            |                               |                                      |                                                                            |                  |                                                                            |
|----------------|--------------------------------------------------------------------------------------------|-------------------------------|--------------------------------------|----------------------------------------------------------------------------|------------------|----------------------------------------------------------------------------|
| <b>t38/212</b> | Percentage incompatible with ratio, for controls with ACEi or ARB at 6 months              | t38r1<br>Table 1<br>page 3001 | 50% t38r1<br>Table 1<br>page 3001    | 4/9=44%                                                                    |                  |                                                                            |
| <b>t38/213</b> | Percentage incompatible with ratio, for controls with beta blockers at 6 months            | t38r1<br>Table 1<br>page 3001 | 75% t38r1<br>Table 1<br>page 3001    | 6/9=67%                                                                    |                  |                                                                            |
| <b>t38/214</b> | Percentage incompatible with ratio, for controls with calcium channel blockers at 6 months | t38r1<br>Table 1<br>page 3001 | 50% t38r1<br>Table 1<br>page 3001    | 4/9=44%                                                                    |                  |                                                                            |
| <b>t38/215</b> | Percentage incompatible with ratio, for controls with nitrates at 6 months                 | t38r1<br>Table 1<br>page 3001 | 50% t38r1<br>Table 1<br>page 3001    | 4/9=44%                                                                    |                  |                                                                            |
| <b>t40/201</b> | Disparity in numbers in flowchart showing enrolment and follow-up analysis                 | t40r1<br>Figure 1             | Randomised n=70<br>t40r1<br>Figure 1 | Flow chart shows 70 splitting into 42 and 20, 8 patients not accounted for | t40r1<br>Methods | "62 patients with AMI who met inclusion criteria were randomly allocated". |



|                |                                                 |                  |                                                                                                                                   |
|----------------|-------------------------------------------------|------------------|-----------------------------------------------------------------------------------------------------------------------------------|
| <b>t40/202</b> | Impossible % of recipients with hypertension    | t40r2<br>Table 1 | 60% of 38 patients is not an integer number of patients. Possible integer numbers of patients would be 22 (57.9%) and 23 (60.5%). |
| <b>t40/203</b> | Impossible % of recipients with hyperlipidaemia | t40r2<br>Table 1 | 60% of 38 patients is not an integer number of patients. Possible integer numbers of patients would be 22 (57.9%) and 23 (60.5%). |
| <b>t40/204</b> | Impossible % of recipients smoking              | t40r2<br>Table 1 | 80% of 38 patients is not an integer number of patients. Possible integer numbers of patients would be 30 (78.9%) and 31 (81.6%). |
| <b>t40/205</b> | Impossible % of recipients with diabetes        | t40r2<br>Table 1 | 20% of 38 patients is not an integer number of patients. Possible integer numbers of patients would be 7 (18.4%) and 8 (21.1%).   |

|                |                                                       |                  |                                                                                                                                   |
|----------------|-------------------------------------------------------|------------------|-----------------------------------------------------------------------------------------------------------------------------------|
| <b>t40/206</b> | Impossible % of recipients with family history        | t40r2<br>Table 1 | 20% of 38 patients is not an integer number of patients. Possible integer numbers of patients would be 7 (18.4%) and 8 (21.1%).   |
| <b>t40/207</b> | Impossible % of recipients on aldosterone antagonists | t40r2<br>Table 1 | 20% of 38 patients is not an integer number of patients. Possible integer numbers of patients would be 7 (18.4%) and 8 (21.1%).   |
| <b>t40/208</b> | Impossible % of controls with hypertension            | t40r2<br>Table 1 | 65% of 18 patients is not an integer number of patients. Possible integer numbers of patients would be 11 (61.1%) and 12 (66.7%). |
| <b>t40/209</b> | Impossible % of controls with hyperlipidaemia         | t40r2<br>Table 1 | 65% of 18 patients is not an integer number of patients. Possible integer numbers of patients would be 11 (61.1%) and 12 (66.7%). |

|                |                                                     |               |                                                                                                                                   |
|----------------|-----------------------------------------------------|---------------|-----------------------------------------------------------------------------------------------------------------------------------|
| <b>t40/210</b> | Impossible % of controls smoking                    | t40r2 Table 1 | 80% of 18 patients is not an integer number of patients. Possible integer numbers of patients would be 14 (77.8%) and 15 (83.3%). |
| <b>t40/211</b> | Impossible % of controls with diabetes              | t40r2 Table 1 | 25% of 18 patients is not an integer number of patients. Possible integer numbers of patients would be 4 (22.2%) and 5 (27.8%).   |
| <b>t40/212</b> | Impossible % of controls with family history        | t40r2 Table 1 | 10% of 18 patients is not an integer number of patients. Possible integer numbers of patients would be 1 (5.6%) and 2 (11.1%).    |
| <b>t40/213</b> | Impossible % of controls on aldosterone antagonists | t40r2 Table 1 | 20% of 18 patients is not an integer number of patients. Possible integer numbers of patients would be 3 (16.7%) and 4 (22.2%).   |

|                |                                              |                  |                                                                                                                                   |
|----------------|----------------------------------------------|------------------|-----------------------------------------------------------------------------------------------------------------------------------|
| <b>t40/214</b> | Impossible % recipients with hypertension    | t40r3<br>Table 1 | 60% of 38 patients is not an integer number of patients. Possible integer numbers of patients would be 22 57.9(%) and 23 (60.5%). |
| <b>t40/215</b> | Impossible % recipients with hyperlipidaemia | t40r3<br>Table 1 | 60% of 38 patients is not an integer number of patients. Possible integer numbers of patients would be 22 57.9(%) and 23 (60.5%). |
| <b>t40/217</b> | Impossible % recipients smoking              | t40r3<br>Table 1 | 80% of 38 patients is not an integer number of patients. Possible integer numbers of patients would be 30 (78.9%) and 31 (81.6%). |
| <b>t40/218</b> | Impossible % recipients with diabetes        | t40r3<br>Table 1 | 20% of 38 patients is not an integer number of patients. Possible integer numbers of patients would be 7 (18.4%) and 8 (21.1%).   |

|                |                                                    |                  |                                                                                                                                   |
|----------------|----------------------------------------------------|------------------|-----------------------------------------------------------------------------------------------------------------------------------|
| <b>t40/219</b> | Impossible % recipients with family history        | t40r3<br>Table 1 | 20% of 38 patients is not an integer number of patients. Possible integer numbers of patients would be 7 (18.4%) and 8 (21.1%).   |
| <b>t40/220</b> | Impossible % recipients on aldosterone antagonists | t40r3<br>Table 1 | 20% of 38 patients is not an integer number of patients. Possible integer numbers of patients would be 7 (18.4%) and 8 (21.1%).   |
| <b>t40/221</b> | Impossible % controls with hypertension            | t40r3<br>Table 1 | 65% of 18 patients is not an integer number of patients. Possible integer numbers of patients would be 11 (61.1%) and 12 (66.7%). |
| <b>t40/222</b> | Impossible % controls with hyperlipidaemia         | t40r3<br>Table 1 | 65% of 18 patients is not an integer number of patients. Possible integer numbers of patients would be 11 (61.1%) and 12 (66.7%). |

|                |                                                  |               |                                                                                                                                   |
|----------------|--------------------------------------------------|---------------|-----------------------------------------------------------------------------------------------------------------------------------|
| <b>t40/223</b> | Impossible % controls smoking                    | t40r3 Table 1 | 80% of 18 patients is not an integer number of patients. Possible integer numbers of patients would be 14 (77.8%) and 15 (83.3%). |
| <b>t40/224</b> | Impossible % controls with diabetes              | t40r3 Table 1 | 25% of 18 patients is not an integer number of patients. Possible integer numbers of patients would be 4 (22.2%) and 5 (27.8%).   |
| <b>t40/225</b> | Impossible % controls with family history        | t40r3 Table 1 | 10% of 18 patients is not an integer number of patients. Possible integer numbers of patients would be 1 (5.6%) and 2 (11.1%).    |
| <b>t40/226</b> | Impossible % controls on aldosterone antagonists | t40r3 Table 1 | 20% of 18 patients is not an integer number of patients. Possible integer numbers of patients would be 3 (16.7%) and 4 (22.2%).   |

|                |                                              |                  |                                                                                                                                   |
|----------------|----------------------------------------------|------------------|-----------------------------------------------------------------------------------------------------------------------------------|
| <b>t40/227</b> | Impossible % recipients with hypertension    | t40r1<br>Table 1 | 65% of 42 patients is not an integer number of patients. Possible integer numbers of patients would be 27 (64.3%) and 28 (66.7%). |
| <b>t40/228</b> | Impossible % recipients with hyperlipidaemia | t40r1<br>Table 1 | 65% of 42 patients is not an integer number of patients. Possible integer numbers of patients would be 27 (64.3%) and 28 (66.7%). |
| <b>t40/229</b> | Impossible % recipients with diabetes        | t40r1<br>Table 1 | 25% of 42 patients is not an integer number of patients. Possible integer numbers of patients would be 10 (23.8%) and 11 (26.2%). |
| <b>t40/230</b> | Impossible % recipients with family history  | t40r1<br>Table 1 | 20% of 42 patients is not an integer number of patients. Possible integer numbers of patients would be 8 (19.0%) and 9 (21.4%).   |

|                |                                                                    |                           |                                                                                                                                    |                           |                                          |
|----------------|--------------------------------------------------------------------|---------------------------|------------------------------------------------------------------------------------------------------------------------------------|---------------------------|------------------------------------------|
| <b>t40/231</b> | Impossible % recipients on aldosterone antagonists                 | t40r1<br>Table 1          | 25% of 42 patients is not an integer number of patients. Possible integer numbers of patients would be 10 (23.8%) and 11 (26.2%).  |                           |                                          |
| <b>t41/201</b> | Recipients who had died were still taking medication               | t41r4<br>Table 1<br>p1644 | 12 of 41 died by 3 years                                                                                                           | t41r4<br>Table 1<br>p1644 | 41/41 were taking ACEi or ARB at 3 years |
| <b>t41/202</b> | Recipients who had died were still taking medication               | t41r4<br>Table 1<br>p1644 | 14 of 40 died by 3 years                                                                                                           | t41r4<br>Table 1<br>p1644 | 40/40 were taking ACEi or ARB at 3 years |
| <b>t43/201</b> | Inconsistent number of controls when describing location of MI     | t43r1<br>Table 1          | 9+5+3+2=19 (multi-side infarcts are given separate categories, so this is not double-counting)                                     | t43r1<br>Table 1          | Control group is said to be n=18         |
| <b>t45/201</b> | Impossible % of patients in late treatment group with hypertension | t45r1<br>Table 1          | 38.7% of 63 patients is not an integer number of patients. Possible integer numbers of patients would be 24 (38.1%) or 25 (39.7%). |                           |                                          |



|                |                                                                              |               |                                                                                                                                    |
|----------------|------------------------------------------------------------------------------|---------------|------------------------------------------------------------------------------------------------------------------------------------|
| <b>t45/202</b> | Impossible % of patients in late treatment group with hyperlipidaemia        | t45r1 Table 1 | 41.9% of 63 patients is not an integer number of patients. Possible integer numbers of patients would be 26 (41.3%) or 27 (42.9%). |
| <b>t45/203</b> | Impossible % of patients in late treatment group with diabetes               | t45r1 Table 1 | 9.7% of 63 patients is not an integer number of patients. Possible integer numbers of patients would be 6 (9.5%) or 7 (11.1%).     |
| <b>t45/204</b> | Impossible % of patients in late treatment group with family history of CAD  | t45r1 Table 1 | 24.2% of 63 patients is not an integer number of patients. Possible integer numbers of patients would be 15 (23.8%) or 16 (25.4%). |
| <b>t45/205</b> | Impossible % of patients in early treatment group with family history of CAD | t45r1 Table 1 | 26.1% of 65 patients is not an integer number of patients. Possible integer numbers of patients would be 16 (24.6%) or 17 (26.2%). |

|                |                                                                                                       |                  |                                                                                                                                    |
|----------------|-------------------------------------------------------------------------------------------------------|------------------|------------------------------------------------------------------------------------------------------------------------------------|
| <b>t45/206</b> | Impossible % of controls with concomitant PCI other than infarct related artery                       | t45r1<br>Table 1 | 18.2% of 67 patients is not an integer number of patients. Possible integer numbers of patients would be 12 (17.9%) or 13 (19.4%). |
| <b>t45/207</b> | Impossible % of controls using Glycoprotein IIb/IIIa inhibitors/bivalirudin                           | t45r1<br>Table 1 | 71.7% of 67 patients is not an integer number of patients. Possible integer numbers of patients would be 48 (71.6%) or 49 (73.1%). |
| <b>t45/208</b> | Impossible % of patients in late treatment group using Glycoprotein IIb/IIIa inhibitors/bivalirudin   | t45r1<br>Table 1 | 78.1% of 63 patients is not an integer number of patients. Possible integer numbers of patients would be 49 (77.8%) or 50 (79.4%). |
| <b>t45/209</b> | Impossible % of patients in late treatment group with intra aortic balloon pump / other assist device | t45r1<br>Table 1 | 22.6% of 63 patients is not an integer number of patients. Possible integer numbers of patients would be 14 (22.2%) or 15 (23.8%). |

|                |                                                                                                     |                  |                                                                               |                  |                                                                                                         |                                                                                 |                                                                    |
|----------------|-----------------------------------------------------------------------------------------------------|------------------|-------------------------------------------------------------------------------|------------------|---------------------------------------------------------------------------------------------------------|---------------------------------------------------------------------------------|--------------------------------------------------------------------|
| <b>t47/201</b> | Percentage incompatible with ratio, for female controls with 7 days                                 | t47r1<br>Table 1 | 11.70%                                                                        | t47r1<br>Table 1 | 2/17=11.8%                                                                                              |                                                                                 |                                                                    |
| <b>t47/202</b> | Percentage incompatible with ratio, for controls with day 3 who had stent in Left circumflex artery | t47r1<br>Table 1 | 4.70%                                                                         | t47r1<br>Table 1 | 1/24=4.2%                                                                                               |                                                                                 |                                                                    |
| <b>t48/201</b> | Percentage incompatible with ratio, for history of smoking in recipients                            | t48r1<br>Table 1 | 61%                                                                           | t48r1<br>Table 1 | 18/29=62%                                                                                               |                                                                                 |                                                                    |
| <b>t49/201</b> | Number of patients receiving cells                                                                  | t49r3            | 62 (finished treatment by 2003)                                               | t49r5            | 20 t49r4                                                                                                | By 2005, only 50 patients treated, of which only 30 had had 3-month assessment. | t49r5<br>States: Until then only 40 AMI patients have been treated |
| <b>t49/202</b> | Baseline EF comparability                                                                           | t49r3<br>Table 1 | 51.6 (SD 10.6 versus 57.2 (SD 10.4) which gives p=0.004277 by Students t-test | t49r3<br>(Text)  | States: "The control group consisted of 62 patients with comparable left ventricular EF and diagnosis." | t49r3<br>(Table 2)                                                              | 51.6 (SD 11) versus 50.8 (SD 10)                                   |
| <b>t49/203</b> | Number of patients treated                                                                          | t49r3            | Reported results of 62 AMI patients who were treated 2002-2003                | t07r5            | Reported in 2006 that only 50 AMI patients had been treated                                             |                                                                                 |                                                                    |

---
