# Supplementary material
Source: PubMed Central journal article supplement (PMC4793657)
Supplement: nowa013617.ww3_default.pdf [file nowa013617.ww3_default.pdf]

**Appendix 3. Results discrepancies [posted as supplied by author]**

| <b>Discrepancy ID</b> | <b>Discrepancy summary</b>                                                     | <b>Paper 1</b>                                        | <b>Detail from Paper 1</b> | <b>Paper 2</b>                                        | <b>Detail from Paper 2</b> | <b>Paper 3</b> | <b>Detail from Paper 3</b> | <b>Paper 4</b> | <b>Detail from Paper 4</b> |
|-----------------------|--------------------------------------------------------------------------------|-------------------------------------------------------|----------------------------|-------------------------------------------------------|----------------------------|----------------|----------------------------|----------------|----------------------------|
| t01/301               | Percentage incompatible with ratio, for adverse events in recipients           | t01r1<br>Table 3                                      | 81.30%                     | t01r1<br>Table 3                                      | 13/15=86.7%                |                |                            |                |                            |
| t01/302               | Subgroups incompatible with size of whole group of recipients                  | t01r1<br>Table 3                                      | n=5, n=5, n=6              | t01r1<br>Table 3                                      | n=15                       |                |                            |                |                            |
| t02/301               | Percentage incompatible with ratio, for recipients reaching AT at 2 to 3 weeks | t02r1<br>Results (Functiona l capacity) (page 710.e5) | 91%                        | t02r1<br>Results (Functiona l capacity) (page 710.e5) | 42/47=89%                  |                |                            |                |                            |
| t02/302               | Percentage incompatible with ratio, for controls reaching AT at 6 months       | t02r1<br>Results (Functiona l capacity) (page 710.e5) | 96%                        | t02r1<br>Results (Functiona l capacity) (page 710.e5) | 46/50=92%                  |                |                            |                |                            |
| t02/303               | Percentage incompatible with ratio, for recipients reaching AT at 6 months     | t02r1<br>Results (Functiona l capacity) (page 710.e5) | 98%                        | t02r1<br>Results (Functiona l capacity) (page 710.e5) | 49/49=100%                 |                |                            |                |                            |

|                |                                                                     |                  |                         |                  |                                                       |
|----------------|---------------------------------------------------------------------|------------------|-------------------------|------------------|-------------------------------------------------------|
| <b>t02/304</b> | Discrepant change in control EF measured by SPECT                   | t02r6<br>Table 2 | Change listed as 7.0    | t02r6<br>Table 2 | Baseline EF 42.6 and follow-up EF 49.3                |
| <b>t03/301</b> | Discrepant LVEF by angiography change in recipients                 | t03r1<br>Table 3 | Change listed as - 4.1  | t03r1<br>Table 3 | 41.5 at baseline to 36.6 at 6 months (36.6-41.5=-4.9) |
| <b>t03/302</b> | Discrepant LVEDV change in recipients                               | t03r1<br>Table 3 | Change listed as 8.3    | t03r1<br>Table 3 | 154.0 at baseline to 162.0 at 6 months (162-154=8)    |
| <b>t03/303</b> | Discrepant LVESV change in recipients                               | t03r1<br>Table 3 | Change listed as 5.9    | t03r1<br>Table 3 | 103.0 at baseline to 108.0 at 6 months (108-103=5)    |
| <b>t03/304</b> | Discrepant scar to LV volume change in recipients                   | t03r1<br>Table 3 | Change listed as - 4.0  | t03r1<br>Table 3 | 44.3 at baseline to 34.7 at 6 months (34.7-44.3=-9.6) |
| <b>t03/305</b> | Discrepant LVESV change in controls                                 | t03r1<br>Table 3 | Change listed as - 19.8 | t03r1<br>Table 3 | 138.0 at baseline to 113.0 at 6 months (113-138=-25)  |
| <b>t05/301</b> | Discrepancy in post 18 month change in LVEF% in the recipient group | t05r1<br>Table 3 | 5.90%                   | t05r2            | 6.10%                                                 |

|                |                                                                     |                  |                                                                                       |        |                                                                                                                                                                                                                 |
|----------------|---------------------------------------------------------------------|------------------|---------------------------------------------------------------------------------------|--------|-----------------------------------------------------------------------------------------------------------------------------------------------------------------------------------------------------------------|
| <b>t05/302</b> | Discrepancy in post 18 month change in LVEF% in the control group   | t05r1<br>Table 3 | 3.10%                                                                                 | t05r2  | 3.40%                                                                                                                                                                                                           |
| <b>t05/303</b> | Discrepancy in baseline LVEDV index, mL/m2 BSA in the control group | t05r1<br>Table 3 | 81.4±16.9 ml/m2                                                                       | t05r2  | 79.3±12.5 ml/m2                                                                                                                                                                                                 |
| <b>t05/304</b> | Discrepancy at 18 month LVEDV index, mL/m2 BSA in the control group | t05r1<br>Table 3 | 85.0±24.2 ml/m2                                                                       | t05r2  | 82±19 ml/m2                                                                                                                                                                                                     |
| <b>t07/301</b> | Contradictory mortality in recipients                               | t07r1            | 1 death                                                                               | t07r10 | 7 deaths, despite fewer patients with same follow-up; results otherwise identical                                                                                                                               |
| <b>t07/302</b> | VO2 level of patients studied                                       | t07r10           | The 191 stem cell patients have a starting VO2 of 1515±506, and final VO2 of 1681±527 | t07r2  | Appears to have 40 patients added. Added patients must have a VO2 that is an average of 38% higher than the other first 191. Not clear whether these 40 were kept out of first publication because of high VO2. |

|                |                                                      |                   |                                                                                                                      |                  |                                                                                                                                                                                                                               |
|----------------|------------------------------------------------------|-------------------|----------------------------------------------------------------------------------------------------------------------|------------------|-------------------------------------------------------------------------------------------------------------------------------------------------------------------------------------------------------------------------------|
| <b>t07/303</b> | 40 negative-responder patients omitted from STAR?    | t07r10            | mean stem cell effect is + 166 ml/min                                                                                | t07r2            | The 40 extra patients have a starting VO2 of $(1560 \times 239 - 1515 \times 191) / 40 = 2086.9$ , and a final VO2 of $(1740 \times 231 - 1681 \times 191) / 40 = 2021.7$ , i.e. a mean stem cell effect of minus 65.2 ml/min |
| <b>t07/305</b> | Contradiction on comparability of EF                 | t07r1             | Baseline EFs described as comparable, when calculation from displayed data shows $P < 0.0000001$ .                   |                  |                                                                                                                                                                                                                               |
| <b>t07/308</b> | Survival methodology described in contradictory ways | t07r1<br>Methods  | Started not at time 0 but at an arbitrary time                                                                       | t07r1<br>Methods | Reference to SPSS survival analysis, but SPSS not used to produce Figure                                                                                                                                                      |
| <b>t07/309</b> | Kaplan Meier plots are not Kaplan Meier plots        | t07r1<br>Figure 8 | Fail to show the event times as discrete downward steps, but rather as diagonal slopes, which appear manually curved |                  |                                                                                                                                                                                                                               |

|                |                                                         |                             |                                                                                      |
|----------------|---------------------------------------------------------|-----------------------------|--------------------------------------------------------------------------------------|
| <b>t07/310</b> | Impossible % of recipients for coronary artery (RCA)    | t07r10 (Table 1)            | 33.4% of 191 is not an integer number of patients. Could be 63 (33.0%) or 64 (33.5%) |
| <b>t07/311</b> | Impossible % of recipients for coronary artery (LAD)    | t07r10 (Table 1)            | 49.1% of 191 is not an integer number of patients. Could be 93 (48.7%) or 94 (49.2%) |
| <b>t07/312</b> | Impossible % of recipients for coronary artery (RCX)    | t07r10 (Table 1)            | 17.5% of 191 is not an integer number of patients. Could be 33 (17.3%) or 34 (17.8%) |
| <b>t07/313</b> | Miscalculation of NYHA (Class) increments in recipients | t07r10 (Table 3, 3 months)  | 3 month change is quoted as -0.9, miscalculating the actual change of -0.97          |
| <b>t07/314</b> | Miscalculation of NYHA increments in controls           | t07r10 (Table 3, 12 months) | 12 month change is quoted as +0.46, miscalculating the actual change of +0.6         |
| <b>t07/315</b> | Miscalculation of LP in recipients                      | t07r10 (Table 3, 3 months)  | change is quoted as -0.36, miscalculating the actual change of -0.4                  |

|                |                                                           |                             |                                                                      |
|----------------|-----------------------------------------------------------|-----------------------------|----------------------------------------------------------------------|
| <b>t07/316</b> | Miscalculation of LP in controls                          | t07r10 (Table 3, 60 months) | change is quoted as +0.87, miscalculating the actual change of +1.07 |
| <b>t07/317</b> | Miscalculation of VO2Peak increments in recipients        | t07r10 (Table 2)            | change is quoted as +158, miscalculating the actual change of +166   |
| <b>t07/318</b> | Miscalculation of $\Delta$ VO2Peak in controls            | t07r10 (Table 2)            | change is quoted as -29.3, miscalculating the actual change of -7    |
| <b>t07/319</b> | Miscalculation of $\Delta$ O2-Pulse in recipients         | t07r10 (Table 2)            | change is quoted as +0.52, miscalculating the actual change of +0.8  |
| <b>t07/320</b> | Miscalculation of $\Delta$ O2-Pulse in controls           | t07r10 (Table 2)            | change is quoted as -0.9, miscalculating the actual change of -0.1   |
| <b>t07/321</b> | Miscalculation of $\Delta$ Ergometry (Watt) in recipients | t07r10 (Table 2)            | change is quoted as +11.3, miscalculating the actual change of +12   |
| <b>t07/322</b> | Miscalculation of $\Delta$ Ergometry (Watt) in controls   | t07r10 (Table 2)            | change is quoted as -15.2, miscalculating the actual change of -17   |

|                |                                                           |                                  |                                                                     |                                   |                                                                   |
|----------------|-----------------------------------------------------------|----------------------------------|---------------------------------------------------------------------|-----------------------------------|-------------------------------------------------------------------|
| <b>t07/323</b> | Miscalculation of $\Delta$ EDV in controls                | t07r10 (Table 4, after 3 months) | change is quoted as +2.9 miscalculating the actual change of +1     |                                   |                                                                   |
| <b>t07/324</b> | Miscalculation of $\Delta$ ESV in recipients              | t07r10 (Table 4, after 3 months) | change is quoted as -15.9 miscalculating the actual change of -18   | t07r10 (Table 4, after 12 months) | change is quoted as -14.9 miscalculating the actual change of -16 |
| <b>t07/325</b> | Miscalculation of $\Delta$ SVI in recipients              | t07r10 (Table 4, after 3 months) | change is quoted as +4.45 miscalculating the actual change of +4.2  |                                   |                                                                   |
| <b>t07/326</b> | Miscalculation of $\Delta$ P(systolic)/ESV in recipients  | t07r10 (Table 4, after 3 months) | change is quoted as +0.29 miscalculating the actual change of +0.27 |                                   |                                                                   |
| <b>t07/327</b> | Miscalculation of $\Delta$ P(systolic)/ESV in recipients  | t07r10 (Table 5)                 | change is quoted as +0.29 miscalculating the actual change of +0.27 |                                   |                                                                   |
| <b>t07/328</b> | Miscalculation of $\Delta$ Global T(systolic) in controls | t07r10 (Table 5)                 | change is quoted as +0.3 miscalculating the actual change of +0.1   |                                   |                                                                   |

|                |                                                                 |                  |                                                                        |
|----------------|-----------------------------------------------------------------|------------------|------------------------------------------------------------------------|
| <b>t07/329</b> | Miscalculation of $\Delta$ Infarct Size in recipients           | t07r10 (Table 5) | change is quoted as -4.5<br>miscalculating the actual change of -3.2   |
| <b>t07/330</b> | Miscalculation of $\Delta$ Infarct Size in controls             | t07r10 (Table 5) | change is quoted as +1.8<br>miscalculating the actual change of +0.5   |
| <b>t07/331</b> | Miscalculation of $\Delta$ Lown Classification in recipients    | t07r10 (Table 6) | change is quoted as -0.46<br>miscalculating the actual change of -0.53 |
| <b>t07/332</b> | Miscalculation of $\Delta$ Heart Rate Variability in recipients | t07r10 (Table 6) | change is quoted as +5.7<br>miscalculating the actual change of +5.5   |
| <b>t07/333</b> | Miscalculation of $\Delta$ Heart Rate Variability in controls   | t07r10 (Table 6) | change is quoted as -2.67<br>miscalculating the actual change of -1.4  |



|                |                                                         |                 |                                                                                                                                                                                                                                                                                                                                                                                                                                                                                                                                     |
|----------------|---------------------------------------------------------|-----------------|-------------------------------------------------------------------------------------------------------------------------------------------------------------------------------------------------------------------------------------------------------------------------------------------------------------------------------------------------------------------------------------------------------------------------------------------------------------------------------------------------------------------------------------|
| <b>t07/334</b> | Negative NYHA class in the control group post 12 months | t07r1<br>t07r10 | <p>NYHA rose from 3.06 by 0.46 to reach 3.66 at 12 months. The reason for the discrepancy can only be the death of one patient. We can calculate the patient's starting NYHA. The 199 twelve-month survivors must have had a starting NYHA of <math>3.66 - 0.46 = 3.20</math>. Allowing for rounding error this must be at least <math>3.655 - 0.465 = 3.19</math>, and at most <math>3.665 - 0.455 = 3.21</math>. For the baseline NYHA of all to average 3.06, the patient that died must have had a value "y" which fulfills</p> |
| <b>t07/336</b> | Missed significant change in CL-Rest for controls       | t07r1<br>t07r10 | <p><math>100 \times 2 \times 0.1 \times 1 \times 10^{-2} \times 0.8</math><br/>-0.45 (SD 0.8),<br/><math>p &lt; 0.01</math></p>                                                                                                                                                                                                                                                                                                                                                                                                     |

|                |                                                        |                     |                            |
|----------------|--------------------------------------------------------|---------------------|----------------------------|
| <b>t07/337</b> | Missed<br>significant<br>change in VO2<br>for controls | t07r1<br>t07r10     | -29.3 (SD 120),<br>p<0.01  |
| <b>t07/338</b> | Missed<br>significant<br>change in O2-<br>Pulse        | t07r1<br>t07r10     | -0.9 (SD 1.2),<br>p<0.01   |
| <b>t07/339</b> | Missed<br>significant<br>change in<br>Ergometry        | t07r1<br>t07r10     | -15.2 (SD 8.7),<br>p<0.01  |
| <b>t07/340</b> | Missed<br>significant<br>change in NYHA<br>3mo         | t07r10<br>(Table 3) | +0.3 (SD 0.4),<br>p<0.01   |
| <b>t07/341</b> | Missed<br>significant<br>change in NYHA<br>12 mo       | t07r10<br>(Table 3) | +0.46 (SD 0.7),<br>p<0.01  |
| <b>t07/342</b> | Missed<br>significant<br>change in NYHA<br>60 mo       | t07r10<br>(Table 3) | +0.6 (SD 0.87),<br>p<0.01  |
| <b>t07/344</b> | Missed<br>significant<br>change in LP 60<br>mo         | t07r10<br>(Table 3) | +0.87 (SD 0.56),<br>p<0.01 |
| <b>t07/345</b> | Missed<br>significant<br>change in ESV<br>3mo          | t07r1<br>t07r10     | +4.3 (SD 29.8),<br>p<0.05  |

|                |                                                          |                 |                           |
|----------------|----------------------------------------------------------|-----------------|---------------------------|
| <b>t07/346</b> | Missed<br>significant<br>change in ESV<br>12mo           | t07r1<br>t07r10 | +4.6 (SD 31.2),<br>p<0.05 |
| <b>t07/347</b> | Missed<br>significant<br>change in ESV<br>60mo           | t07r1<br>t07r10 | +9.9 (SD 35.7),<br>p<0.01 |
| <b>t07/348</b> | Missed<br>significant<br>change in EF<br>60mo            | t07r1<br>t07r10 | -3.5 (SD 8.9),<br>p<0.01  |
| <b>t07/349</b> | Missed<br>significant<br>change in SVI<br>12mo           | t07r1<br>t07r10 | -1.8 (SD 8.1),<br>p<0.01  |
| <b>t07/350</b> | Missed<br>significant<br>change in SVI<br>60mo           | t07r1<br>t07r10 | -3.9 (SD 7.5),<br>p<0.01  |
| <b>t07/351</b> | Missed<br>significant<br>change in<br>Psyst/ESV 12<br>mo | t07r1<br>t07r10 | -0.1 (SD 0.38),<br>p<0.01 |
| <b>t07/352</b> | Missed<br>significant<br>change in<br>Psyst/ESV 60<br>mo | t07r1<br>t07r10 | -1.7 (SD 0.4),<br>p<0.01  |
| <b>t07/353</b> | Missed<br>significant<br>change in<br>MNSER              | t07r1<br>t07r10 | -0.09 (SD 0.3),<br>p<0.01 |

|                |                                                                                  |                 |                                                                                                                                                                                                                                                                                                                                                                       |
|----------------|----------------------------------------------------------------------------------|-----------------|-----------------------------------------------------------------------------------------------------------------------------------------------------------------------------------------------------------------------------------------------------------------------------------------------------------------------------------------------------------------------|
| <b>t07/354</b> | Missed significant change in Infarct Size                                        | t07r1<br>t07r10 | +1.8 (SD 11.1),<br>p<0.05                                                                                                                                                                                                                                                                                                                                             |
| <b>t07/355</b> | Missed significant change in HRV                                                 | t07r1<br>t07r10 | -2.67 (SD 9.8),<br>p<0.01                                                                                                                                                                                                                                                                                                                                             |
| <b>t07/356</b> | Missed significant change in Lown Classification                                 | t07r1<br>t07r10 | +0.2 (SD 1.1),<br>p<0.05                                                                                                                                                                                                                                                                                                                                              |
| <b>t07/357</b> | Conducting LV-gram without noticing whether patient is alive or dead (recipient) | t07r10          | Median survival followup was 4.6 years, i.e. for half the 191 patients, there was no knowledge of survival after 4.6 years. Yet the number of patients attending at 5 years for invasive assessment of EF, EDV etc, was >95. In fact it was 184. Therefore at least 89 patients underwent invasive LV-gram without the staff noticing whether they were alive or dead |

t07/358

Conducting LV-gram without noticing whether patient is alive or dead (control)

t07r10

Median survival followup was 4.87 years, i.e. for half the 200 controls there was no knowledge of survival after 4.87 years. Yet the number of patients attending at 5 years for invasive assessment of EF etc was >100. In fact it was 168. Therefore at least 68 patients underwent invasive LV-gram without the staff noticing whether they were alive or dead

t07/359

Questioning a patient without noticing whether patient is alive or dead (recipient)

t07r10

Median survival followup was 4.6 years, i.e. for half the 191 patients, there was no knowledge of survival after 4.6 years. Yet the number of patients attending at 5 years to be questioned on symptom status was >95. In fact it was 184. Therefore at least 89 patients underwent questioning to assess NYHA class without the staff noticing whether they were alive or dead

**t07/360**

Questioning a patient without noticing whether patient is alive or dead (control)

t07r10

Median survival followup was 4.87 years, i.e. for half the 200 controls there was no knowledge of survival after 4.87 years. Yet the number of patients attending at 5 years to be questioned on symptom status was >100. In fact it was 168. Therefore at least 68 patients described their symptom level without the staff noticing whether they were alive or dead

**t07/361**

Impossible % of controls for coronary artery (RCA)

t07r10  
(Table 1)

31.2% of 200 is not an integer number of patients. Could be 62 (31.0%) or 63 (31.5%)

|                          |                                                           |                  |                                                                                                                            |            |                                                             |
|--------------------------|-----------------------------------------------------------|------------------|----------------------------------------------------------------------------------------------------------------------------|------------|-------------------------------------------------------------|
| <b>t07/362</b>           | Impossible % for coronary artery (LAD)                    | t07r10 (Table 1) | 50.7% of 200 is not an integer number of patients. Could be 100 (50.0%) or 101 (50.5%)                                     |            |                                                             |
| <b>t07/363</b>           | Impossible % for coronary artery (RCX)                    | t07r10 (Table 1) | 18.1% of 200 is not an integer number of patients. Could be 36 (18.0%) or 37 (18.5%)                                       |            |                                                             |
| <b>t08/301</b>           | Failure of blinding (or inclusion of undisclosed methods) | t08r2            | Values incompatible with blinding: EF SD of sample narrower (2-5%), than the SD of replicate measurements in same patient. |            |                                                             |
| <b>t08/302</b>           | Oxygen consumption BMC group                              | t08r2            | 19% increase                                                                                                               | t08r5      | Increase by 10-15%                                          |
| <b>t08/302 continued</b> |                                                           | t08r2            | 19% increase                                                                                                               | t08r1      | Recipients increase by 24% and controls decrease by 12%     |
| <b>t08/303</b>           | Ejection Fraction in the recipients                       | t08r2            | From 17±1 to 26±3 (+9%)                                                                                                    | t08r6      | Ejection fraction improved ... by 44% in the [t08r2] trial. |
| <b>t08/303 continued</b> |                                                           | t08r2            | From 17±1 to 26±3 (+9%)                                                                                                    | t08r8 p757 | Ejection fraction improved ... by 8% in the [t08r2] trial.  |



|                |                                                                       |                                                               |       |          |       |          |
|----------------|-----------------------------------------------------------------------|---------------------------------------------------------------|-------|----------|-------|----------|
| <b>t09/301</b> | Discrepancy in timepoint of BMC transplantation after PCI             | t09r3 p172 4±1 days<br>Abstract - Methods and results section | t09r6 | 5±1 days | t09r5 | 4±1 days |
| <b>t09/302</b> | Discrepancy in reported increase of HRV after 12 months in recipients | t09r3 p172 62.4±8.3<br>Abstract - Methods and results section | t09r6 | 52±26    |       |          |
| <b>t09/303</b> | Discrepancy in reported increase of HRV after 12 months in controls   | t09r3 p172 19.0±7.5<br>Abstract - Methods and results section | t09r6 | 26±2     |       |          |
| <b>t09/304</b> | Discrepancy in reported increase of BRS after 12 months in recipients | t09r3 p172 8.0±1.8<br>Abstract - Methods and results section  | t09r6 | 6.8±8.8  | t09r5 | 8.7±6.3  |

|                          |                                                                                          |                                                   |            |                               |        |                         |          |                  |
|--------------------------|------------------------------------------------------------------------------------------|---------------------------------------------------|------------|-------------------------------|--------|-------------------------|----------|------------------|
| <b>t09/305</b>           | Discrepancy in reported increase of BRS after 12 months in controls                      | t09r3 p172 Abstract - Methods and results section | -1.9±1.7   | t09r6                         | -2.4±7 | t09r5                   | 3.4±11.7 |                  |
| <b>t09/306</b>           | Percentage incompatible with ratio, for deaths in controls at 12 month follow-up         | t09r2                                             | 4/19=21%   | t09r2 stated percentage       | 24%    | t09r5 stated percentage | 24%      | t09r5 4/19=21%   |
| <b>t09/306 continued</b> |                                                                                          | t09r3 p.175                                       | 4/19=21%   | t09r3 p.175 stated percentage | 24%    | t09r6 stated percentage | 24%      | t09r6 4/19=21%   |
| <b>t09/307</b>           | Inconsistency in the percentage and number of deaths in recipients at 12 month follow-up | t09r2                                             | 2/19=10.5% | t09r2 stated percentage       | 12%    | t09r5 stated percentage | 6%       | t09r5 1/19=5%    |
| <b>t09/307 continued</b> |                                                                                          | t09r3 p.175                                       | 2/19=10.5% | t09r3 p.175 stated percentage | 12%    | t09r6 stated percentage | 12%      | t09r6 2/19=10.5% |

|                |                                                                                                                                                                                     |       |         |                                                                                                      |                                                                      |
|----------------|-------------------------------------------------------------------------------------------------------------------------------------------------------------------------------------|-------|---------|------------------------------------------------------------------------------------------------------|----------------------------------------------------------------------|
| <b>t09/308</b> | Discrepancy in reported mean LVEF at baseline of the 19 recipients                                                                                                                  | t09r5 | 35.1    | t09r3 (Table 3) SPECT Rest (also does not match baseline echo data either)                           | 36.6                                                                 |
| <b>t09/309</b> | Discrepancy in reported mean LVEF at baseline of the 19 controls                                                                                                                    | t09r5 | 36.2    | t09r3 (Table 3) SPECT Rest (also does not match baseline echo data either)                           | 37.5                                                                 |
| <b>t09/310</b> | Discrepancy in reported SE or SD of LVEF at baseline of recipients - Paper 1 does is discrepant with either echo or SPECT data from paper 2, even allowing for SD to SE conversion. | t09r5 | SD: 9.8 | t09r3 (Table 2) obtained by transthoracic echocardiography SE: 1.3 (smaller deviation than controls) | t09r3 (Table 3) SPECT Rest SE: 2.0 (smaller deviation than controls) |

|                |                                                                                                                                                                                     |       |         |                                                            |                                            |                            |                                            |
|----------------|-------------------------------------------------------------------------------------------------------------------------------------------------------------------------------------|-------|---------|------------------------------------------------------------|--------------------------------------------|----------------------------|--------------------------------------------|
| <b>t09/311</b> | Discrepancy in reported SE or SD of LVEF at baseline of recipients - Paper 1 does is discrepant with either echo or SPECT data from paper 2, even allowing for SD to SE conversion. | t09r5 | SD: 9.4 | t09r3 (Table 2) obtained by transthoracic echocardiography | SE: 1.5 (bigger deviation than recipients) | t09r3 (Table 3) SPECT Rest | SE: 2.3 (bigger deviation than recipients) |
| <b>t09/312</b> | Percentage incompatible with ratio, for deaths in controls at 37 month follow-up                                                                                                    | t09r4 |         | 24% t09r4 stated percentage                                | 4/20=20%                                   |                            |                                            |
| <b>t09/313</b> | Percentage incompatible with ratio, for deaths in recipients at 37 month follow-up                                                                                                  | t09r4 |         | 12% t09r4 stated percentage                                | 2/21=9.5%                                  |                            |                                            |

|                |                                                                         |       |                                                                                                                                                                                                                         |       |                                                                                                                                                                                                                         |
|----------------|-------------------------------------------------------------------------|-------|-------------------------------------------------------------------------------------------------------------------------------------------------------------------------------------------------------------------------|-------|-------------------------------------------------------------------------------------------------------------------------------------------------------------------------------------------------------------------------|
| <b>t09/314</b> | Identical results (mean and SD) despite different numbers of recipients | t09r5 | n=19<br>LVEF = 35.1±9.8<br>LVEF increased after 12 months by 41%<br>LVEDV increased after 12 months by 2%<br>HRV after 12 months = 644ms<br>HF after 12 months = 289.3±366 ms<br>BRS after 12 months = 8.7±6.3 ms/mmHg  | t09r1 | n=16<br>LVEF = 35.1±9.8<br>LVEF increased after 12 months by 41%<br>LVEDV increased after 12 months by 2%<br>HRV after 12 months = 644ms<br>HF after 12 months = 289.3±366 ms<br>BRS after 12 months = 8.7±6.3 ms/mmHg  |
| <b>t09/315</b> | Identical results (mean and SD) despite different numbers of controls   | t09r5 | n=19<br>LVEF = 36.2±9.4<br>LVEF increased after 12 months by 25%<br>LVEDV increased after 12 months by 12%<br>HRV after 12 months = -20ms<br>HF after 12 months = 85.7±216 ms<br>BRS after 12 months = 3.4±11.7 ms/mmHg | t09r1 | n=17<br>LVEF = 36.2±9.4<br>LVEF increased after 12 months by 25%<br>LVEDV increased after 12 months by 12%<br>HRV after 12 months = -20ms<br>HF after 12 months = 85.7±216 ms<br>BRS after 12 months = 3.4±11.7 ms/mmHg |

|                |                                                                                     |                                                            |                                                                                                                                              |                                                    |
|----------------|-------------------------------------------------------------------------------------|------------------------------------------------------------|----------------------------------------------------------------------------------------------------------------------------------------------|----------------------------------------------------|
| <b>t09/316</b> | Percentage incompatible with ratio for cardiac deaths in controls                   | t09r3<br>Table 4                                           | 15% t09r3<br>Table 4<br>stated<br>percentag<br>e                                                                                             | 3/19=16%                                           |
| <b>t09/317</b> | Discrepancy between number of deaths and percentage of cardiac deaths in recipients | t09r3<br>Table 4                                           | 10% t09r3<br>Table 4<br>stated<br>percentag<br>e                                                                                             | 2/19=11%                                           |
| <b>t10/301</b> | Mathematically impossible claim of baseline NYHA for recipients                     | t10r1<br>p1533<br>NYHA<br>Functional<br>Classificati<br>on | No combination of integer values can produce a mean that can be rounded to 2.6 whilst having a standard deviation that can be rounded to 0.3 |                                                    |
| <b>t10/302</b> | Mathematically impossible claim of baseline NYHA for controls                       | t10r1<br>p1534<br>NYHA<br>Functional<br>Classificati<br>on | No combination of integer values can produce a mean that can be rounded to 2.5 whilst having a standard deviation that can be rounded to 0.2 |                                                    |
| <b>t11/301</b> | Discrepancy between Tables in baseline ACS in BM recipients                         | t11r1<br>Table 1 p<br>360                                  | ACS group 1:<br>32±12                                                                                                                        | t11r1<br>Table 3 p<br>361<br>ACS group 1:<br>33±12 |

|                |                                                                               |                           |                                  |                           |                                  |
|----------------|-------------------------------------------------------------------------------|---------------------------|----------------------------------|---------------------------|----------------------------------|
| <b>t11/302</b> | Discrepancy between Tables in baseline ACS in GCSF recipients                 | t11r1<br>Table 1 p<br>360 | ACS group 2:<br>36±11            | t11r1<br>Table 3 p<br>361 | ACS group 2: 39±7                |
| <b>t11/303</b> | Discrepancy between Tables in baseline ACS in controls                        | t11r1<br>Table 1 p<br>360 | ACS group<br>3:28±14             | t11r1<br>Table 3 p<br>361 | ACS group<br>3:27±13             |
| <b>t11/304</b> | Discrepancy between Tables in baseline % of affected radii in BM recipients   | t11r1<br>Table 1 p<br>360 | Affected radii group<br>1: 40±16 | t11r1<br>Table 3 p<br>361 | Affected radii group<br>1: 47±6  |
| <b>t11/305</b> | Discrepancy between Tables in baseline % of affected radii in GCSF recipients | t11r1<br>Table 1 p<br>360 | Affected radii group<br>2: 47±14 | t11r1<br>Table 3 p<br>361 | Affected radii group<br>2: 52±6  |
| <b>t11/306</b> | Discrepancy between Tables in baseline % of affected radii in controls        | t11r1<br>Table 1 p<br>360 | Affected radii group<br>3: 36±11 | t11r1<br>Table 3 p<br>361 | Affected radii group<br>3: 46±11 |
| <b>t11/307</b> | Discrepancy between Tables in Ejection Fraction in GCSF recipients            | t11r1<br>Table 1 p<br>360 | EF group 2: 39±5                 | t11r1<br>Table 3 p<br>361 | EF group 2: 37±5                 |
| <b>t11/308</b> | Discrepancy between Tables in Ejection Fraction in controls                   | t11r1<br>Table 1 p<br>360 | EF group 3: 38±6                 | t11r1<br>Table 3 p<br>361 | EF group 3: 39±6                 |

|                |                                                            |                           |                         |                           |                                                   |
|----------------|------------------------------------------------------------|---------------------------|-------------------------|---------------------------|---------------------------------------------------|
| <b>t11/309</b> | Discrepancy in net gain in ACS in BM recipients            | t11r1<br>Table 4 p<br>361 | Change given as -<br>20 | t11r1<br>Table 3 p<br>361 | ACS 33 at baseline and 8 at follow-up             |
| <b>t11/310</b> | Discrepancy in net gain in ACS in GCSF recipients          | t11r1<br>Table 4 p<br>361 | Change given as -<br>12 | t11r1<br>Table 3 p<br>361 | ACS 39 at baseline and 25 at follow-up            |
| <b>t11/311</b> | Discrepancy in net gain in ACS in controls                 | t11r1<br>Table 4 p<br>361 | Change given as -6      | t11r1<br>Table 3 p<br>361 | ACS 27 at baseline and 16 at follow-up            |
| <b>t11/312</b> | Discrepancy in net gain in affected radii in BM recipients | t11r1<br>Table 4 p<br>361 | Change given as -<br>26 | t11r1<br>Table 3 p<br>361 | Affected radii 47 at baseline and 24 at follow-up |
| <b>t11/313</b> | Discrepancy in net gain in affected radii in controls      | t11r1<br>Table 4 p<br>361 | Change given as -<br>12 | t11r1<br>Table 3 p<br>361 | Affected radii 46 at baseline and 36 at follow-up |



**t12/301**

Trial reported as positive( $p=0.05$ ), but revised data later indicate EF increment is substantially smaller, which implies that it should now be considered neutral

t12r2  
Figure 2

Original presentation is that EF increment is +7.1 in 39 recipients

t12r1 page 66

Subsequent revised data shows EF increment is 12.7 in 21 recipients and -0.8 in 18 recipients, so that group mean effect is  $+((12.7 \times 21) + (-0.8 \times 18)) / 39 = +6.5$ . On this basis the recipient versus control comparison gives  $p > 0.05$ . With best-case rounding, using 12.75 and -0.75 then then mean is still 6.5.

**t12/302**

Conflict on how many stem cell patients underwent 6 month LV angio

t12r2  
Figure 2

39 t12r2  
Table 2

36 t12r2  
Results

"Adequate contrast opacification of left ventricular angiograms both at baseline and at 6 months were available for 36 patients in each group."

|                |                                                                                                                 |                   |                              |                     |                                                                                                                                                 |
|----------------|-----------------------------------------------------------------------------------------------------------------|-------------------|------------------------------|---------------------|-------------------------------------------------------------------------------------------------------------------------------------------------|
| <b>t12/303</b> | Conflict on how many controls underwent 6 month LV angio                                                        | t12r2<br>Figure 2 | 38 t12r2<br>Table 2          | 36 t12r2<br>Results | "Adequate contrast opacification of left ventricular angiograms both at baseline and at 6 months were available for 36 patients in each group." |
| <b>t12/304</b> | Erroneous confidence interval of change in VPDs per h in recipients (median and presumably interquartile range) | t12r2<br>Table 3  | 0.4 (-0.6 to -0.4),<br>ditto |                     |                                                                                                                                                 |
| <b>t12/305</b> | Erroneous confidence interval of change in VPDs per h in control (median and presumably interquartile range)    | t12r2<br>Table 3  | 0 (-0.9 to -1.4), ditto      |                     |                                                                                                                                                 |

|                |                                                                                                                          |                  |                                  |
|----------------|--------------------------------------------------------------------------------------------------------------------------|------------------|----------------------------------|
| <b>t12/306</b> | Erroneous confidence interval of Treatment effect on QRS duration (median and presumably interquartile range)            | t12r2<br>Table 3 | 0.37 (-5.4 to - 6.2),<br>ditto   |
| <b>t12/307</b> | Erroneous confidence interval of Treatment effect on duration less than 40uV (median and presumably interquartile range) | t12r2<br>Table 3 | 0.49 (-4.1 to -5.1),<br>ditto    |
| <b>t12/308</b> | Erroneous confidence interval of Treatment effect on Maximum heart rate (median and presumably interquartile range)      | t12r2<br>Table 3 | 0.41 (-1.11 to -<br>0.32), ditto |

|                |                                                                                                       |                                           |                                                        |                             |                               |
|----------------|-------------------------------------------------------------------------------------------------------|-------------------------------------------|--------------------------------------------------------|-----------------------------|-------------------------------|
| <b>t12/309</b> | Erroneous confidence interval of Treatment effect on METs (median and presumably interquartile range) | t12r2 Table 3                             | 0.41 (-1.11 – 0.12), ditto                             |                             |                               |
| <b>t12/310</b> | Discrepancy in increase in METS in stem cell group                                                    | t12r2 Table 3                             | 6.1 pre, 6.9 post                                      | t12r2 Table 3               | Increase stated to be 0.5     |
| <b>t12/311</b> | Continuous-variable treatment effect given for a dichotomous variable                                 | t12r2 Table 3                             | T-wave alternans at baseline: -6.0 (-13.8 to -1.90)    |                             |                               |
| <b>t12/312</b> | Two different confidence intervals with the same point estimate, given the same P value               | t12r2 Paper Table 3<br>Maximum Heart Rate | 0.41 (-1.11 to -0.32), p=0.26                          | t12r2 Paper Table 3<br>METs | 0.41 (-1.11 to -0.12), p=0.26 |
| <b>t12/313</b> | Erroneous calculated change in EDV                                                                    | t12r2 Table 2                             | Change in EDV from 148 to 152 is change of +4 not +5.4 |                             |                               |

|                |                                                                  |               |                                                                                                                                              |     |
|----------------|------------------------------------------------------------------|---------------|----------------------------------------------------------------------------------------------------------------------------------------------|-----|
| <b>t14/301</b> | Contradictory mean for baseline wall motion scores in recipients | t14r1 Table 1 | 1.8 t14r1 Table 2                                                                                                                            | 1.7 |
| <b>t14/302</b> | Mathematically impossible claim of baseline NYHA in controls     | t14r1 Table 2 | No combination of integer values can produce a mean that can be rounded to 2.6 whilst having a standard deviation that can be rounded to 0.3 |     |
| <b>t14/303</b> | Mathematically impossible claim of 6 months NYHA in controls     | t14r1 Table 2 | No combination of integer values can produce a mean that can be rounded to 2.4 whilst having a standard deviation that can be rounded to 0.3 |     |
| <b>t14/304</b> | Mathematically impossible claim of baseline NYHA in recipients   | t14r1 Table 2 | No combination of integer values can produce a mean that can be rounded to 2.3 whilst having a standard deviation that can be rounded to 0.2 |     |

|                |                                                                                                               |                  |                                                                                                                                              |                  |                                                                                  |
|----------------|---------------------------------------------------------------------------------------------------------------|------------------|----------------------------------------------------------------------------------------------------------------------------------------------|------------------|----------------------------------------------------------------------------------|
| <b>t14/305</b> | Mathematically impossible claim of 6 months CCS in controls                                                   | t14r1<br>Table 2 | No combination of integer values can produce a mean that can be rounded to 2.6 whilst having a standard deviation that can be rounded to 0.3 |                  |                                                                                  |
| <b>t16/301</b> | Absolute change of LVEF in high-dose shock wave recipients incompatible with values for baseline and 4 months | t16r5<br>Table 2 | Absolute change annotated as 3.5                                                                                                             | t16r5<br>Table 2 | Increase from 32.4 to 35.5 is at most a change of 3.2 in mean allowing rounding  |
| <b>t16/302</b> | Absolute change of LVEF in high-dose shock wave controls incompatible with values for baseline and 4 months   | t16r5<br>Table 2 | Absolute change annotated as 1.5                                                                                                             | t16r5<br>Table 2 | Increase from 32.3 to 34.0 is at least a change of 1.6 in mean allowing rounding |
| <b>t16/303</b> | Absolute change of LVEF in placebo shock wave recipients incompatible with values for baseline and 4 months   | t16r5<br>Table 2 | Absolute change annotated as 0.8                                                                                                             | t16r5<br>Table 2 | Increase from 33.4 to 34.4 is at least a change of 0.9 in mean allowing rounding |

|                |                                                                                                               |                  |                                                                                                 |                  |                                                                              |
|----------------|---------------------------------------------------------------------------------------------------------------|------------------|-------------------------------------------------------------------------------------------------|------------------|------------------------------------------------------------------------------|
| <b>t16/304</b> | Absolute change of EDVI in high-dose shock wave recipients incompatible with values for baseline and 4 months | t16r5<br>Table 2 | Absolute change annotated as -1                                                                 | t16r5<br>Table 2 | Increase from 105 to 102 is at most a change of -2 in mean allowing rounding |
| <b>t16/305</b> | Absolute change of EDVI in high-dose shock wave controls incompatible with values for baseline and 4 months   | t16r5<br>Table 2 | Absolute change annotated as 6                                                                  | t16r5<br>Table 2 | Increase from 111 to 114 is at most a change of 4 in mean allowing rounding  |
| <b>t16/306</b> | Absolute change of ESVI in high-dose shock wave controls incompatible with values for baseline and 4 months   | t16r5<br>Table 2 | Absolute change annotated as 2                                                                  | t16r5<br>Table 2 | Increase from 79 to 79 is at most a change of 1 in mean allowing rounding    |
| <b>t17/301</b> | Discrepant change in contractility in the infarcted zone of the control group at 4 month followup             | t17r4<br>Table 2 | -1.54 at baseline to 1.27 at 4 months is a minimum difference of 2.8 (as explained in appendix) | t17r4<br>Table 2 | Change given as 0.28                                                         |

|                |                                                                                                                                                       |                  |                                                                                                                                                                                                                                                                                                                                            |                                       |                                                                                                           |                                                  |                                                                                                                                                       |
|----------------|-------------------------------------------------------------------------------------------------------------------------------------------------------|------------------|--------------------------------------------------------------------------------------------------------------------------------------------------------------------------------------------------------------------------------------------------------------------------------------------------------------------------------------------|---------------------------------------|-----------------------------------------------------------------------------------------------------------|--------------------------------------------------|-------------------------------------------------------------------------------------------------------------------------------------------------------|
| <b>t17/302</b> | Discrepancy in the number of beta blocker receivers at discharge in the control subgroup relative to the overall number of control patients           | t17r3<br>Table 1 | The overall control group consisted only of 92 patients                                                                                                                                                                                                                                                                                    | t17r3<br>Table 1                      | 95 patients received beta blockers, i.e. 103%                                                             | t17r3<br>Table 1                                 | Stated percentage 100%                                                                                                                                |
| <b>t17/303</b> | Contradiction between curve and annotation below Figure, in numbers of recipients at 360 days free of death, myocardial infarction, revascularisation | t17r2<br>p2777   | At 12 months, there is complete followup of recipients: "data could be completely acquired in the BMC group", which means the Kaplan-Meier plots curve should show exactly the raw event rate. If there are n patients exposed to risk, there have been exactly 101-n events, and the cumulative event rate is exactly $(101-n)/101*100\%$ | t17r2<br>Figure 3A<br>graph<br>itself | At 360 days, Kaplan-Meier curve shows event-free survival is 77%, i.e. 78 event-free survivors out of 101 | t17r2<br>Figure 3A<br>annotation<br>under x-axis | At 360 days, annotation under x-axis shows number of event-free survivors to be only 66, i.e. a discrepancy of 12 events between annotation and curve |



|                |                                                                                                                                                                         |                |                                                                                                                                                                                                                                                                                                                                            |                                         |                                                                                                           |                                                      |                                                                                                                                                       |
|----------------|-------------------------------------------------------------------------------------------------------------------------------------------------------------------------|----------------|--------------------------------------------------------------------------------------------------------------------------------------------------------------------------------------------------------------------------------------------------------------------------------------------------------------------------------------------|-----------------------------------------|-----------------------------------------------------------------------------------------------------------|------------------------------------------------------|-------------------------------------------------------------------------------------------------------------------------------------------------------|
| <b>t17/304</b> | Contradiction between curve and annotation below Figure, in numbers of recipients at 360 days free of death, myocardial infarction, rehospitalisation for heart failure | t17r2<br>p2777 | At 12 months, there is complete followup of recipients: "data could be completely acquired in the BMC group", which means the Kaplan-Meier plots curve should show exactly the raw event rate. If there are n patients exposed to risk, there have been exactly 101-n events, and the cumulative event rate is exactly $(101-n)/101*100\%$ | t17r2<br>Figure 3B<br>graph<br>itself   | At 360 days, Kaplan Meier curve shows event-free survival is 98%, i.e. 99 event-free survivors out of 101 | t17r2<br>Figure 3B<br>annotation<br>under x-<br>axis | At 360 days, annotation under x-axis shows number of event-free survivors to be only 85, i.e. a discrepancy of 14 events between annotation and curve |
| <b>t17/305</b> | Patient disappeared from analysis of death, myocardial infarction and revascularisation without having event and without being lost to followup                         | t17r2<br>p2777 | No recipients lost to follow up before 12 months                                                                                                                                                                                                                                                                                           | t17r2<br>Figure 3A<br>Axis<br>labelling | Number of event-free recipients falls by 3                                                                | t17r2<br>Figure 3A                                   | Kaplan-Meier curve shows exactly 2 recipients having events a between 200 and 300 days                                                                |

t17/306

Patient disappeared from analysis of death, myocardial infarction and rehospitalisation for heart failure without having event and without being lost to followup

t17r2  
p2777

No recipients lost to follow up before 12 months

t17r2  
Figure 3B  
Axis  
labelling

Number of event-free recipients falls by 1

t17r2  
Figure 3B

Kaplan-Meier curve shows no recipients having events a between 200 and 300 days

t17/307

Contradiction on whether the stroke volume is significantly different at 4 months in the control subgroup with EF > median

t17r3  
Table 2

Change is given as 6.3±14.4 (n=40), for which calculated P value should be 0.009

t17r3  
Table 2

Stated P value is 0.29

|                |                                                                                                     |              |                                      |             |                                                                                                            |              |                                                                                                                                                                                                                                                                |
|----------------|-----------------------------------------------------------------------------------------------------|--------------|--------------------------------------|-------------|------------------------------------------------------------------------------------------------------------|--------------|----------------------------------------------------------------------------------------------------------------------------------------------------------------------------------------------------------------------------------------------------------------|
| <b>t17/308</b> | At least one control who had had an event at 200 days, by 400 days no longer had had that event.    | t17r2 Fig 3A | 55 controls event-free at 360 days   | t17r2 p2777 | 3 controls had been lost to followup by 12 months                                                          | t17r1 Fig 3A | 60 controls event-free at 400 days. Not possible even if all 55 event-free patients at 360 days remained event-free, and even if all 4 controls previously lost to followup were found and were event free, $55+3=58$ so there are 2 "new" controls introduced |
| <b>t17/309</b> | At least 10 recipients who had had an event at 200 days, by 400 days no longer had had that event.  | t17r2 Fig 3A | 66 recipients event-free at 360 days | t17r2 p2777 | At 12 months, no recipients had been lost to followup "data could be completely acquired in the BMC group" | t17r1 Fig 3A | 76 recipients event-free at 400 days                                                                                                                                                                                                                           |
| <b>t17/310</b> | At least seven controls who had had an event at 200 days, by 400 days no longer had had that event. | t17r2 Fig 3B | 79 controls event-free at 360 days   | t17r2 p2777 | At 12 months, 4 controls had been lost to followup                                                         | t17r1 Fig 3B | 90 controls event-free at 400 days                                                                                                                                                                                                                             |

|                |                                                                                                    |                            |                                                                                                                                                               |                          |                                                                                                                                                               |              |                                      |
|----------------|----------------------------------------------------------------------------------------------------|----------------------------|---------------------------------------------------------------------------------------------------------------------------------------------------------------|--------------------------|---------------------------------------------------------------------------------------------------------------------------------------------------------------|--------------|--------------------------------------|
| <b>t17/311</b> | At least 13 recipients who had had an event at 200 days, by 400 days no longer had had that event. | t17r2 Fig 3B               | 85 recipients event-free at 360 days                                                                                                                          | t17r2 p2777              | At 12 months, no recipients had been lost to followup                                                                                                         | t17r1 Fig 3B | 98 recipients event-free at 400 days |
| <b>t18/301</b> | Inconsistent p value for EF between groups at baseline between abstract and Table                  | t18r1 Abstract             |                                                                                                                                                               | 0.38 t18r1 Table 3       |                                                                                                                                                               |              | 0.19                                 |
| <b>t18/302</b> | Inconsistent p value for EF between groups at 4 months between abstract and Table                  | t18r1 Table 3              |                                                                                                                                                               | 0.23 t18r1 Table 3       |                                                                                                                                                               |              | 0.25                                 |
| <b>t21/301</b> | Identical results, possible duplication (although contradictory sample sizes)                      | t21r11 (150 + 45 patients) | PET glucose uptake 42±8 pre, 50±12 after. EFs: 52±10 and 49±8 pre, 51±9 and 48±11 post, 53±10 and 55±10 three months post. Vo2 1465±533 pre and 1630±523 post | t21r2 (25 + 25 patients) | PET glucose uptake 42±8 pre, 50±12 after. EFs: 52±10 and 49±8 pre, 51±9 and 48±11 post, 53±10 and 55±10 three months post. Vo2 1465±533 pre and 1630±523 post |              |                                      |
| <b>t21/302</b> | Reduction in infarct size                                                                          | t21r3                      |                                                                                                                                                               | 25% t21r5                |                                                                                                                                                               |              | 30%                                  |

|                |                                                                                  |                     |                                                                                                                                                     |                 |                                                                                                              |
|----------------|----------------------------------------------------------------------------------|---------------------|-----------------------------------------------------------------------------------------------------------------------------------------------------|-----------------|--------------------------------------------------------------------------------------------------------------|
| <b>t21/303</b> | Ejection Fraction                                                                | t21r5               | Distant previous EFs only done in 16 of 18 patients                                                                                                 | t21r7           | All 18 distant previous EFs had been performed, identical mean and standard deviation as the 16 IACT         |
| <b>t21/304</b> | Number of patients that did not respond                                          | t21r5 (Text)        | An unchanged or even impaired LV function was not observed in any patient.                                                                          | t21r5 (Table 2) | Patient 14: Ejection fraction 62% at the distant pre-test; 62% at stem cell injection; 61% at 3 months after |
| <b>t21/305</b> | Nuclear assessment (PET)                                                         | t21r3               | Performed in only 12 patients. 43.8±8 pre, 50.5±11.6 post                                                                                           | t21r5           | Performed in all 18 patients. 43.8±8 pre, 50.5±11.6 post                                                     |
| <b>t21/306</b> | FDG Uptake %                                                                     | t21r5 t21r7 t21r3   | 15%                                                                                                                                                 | t21r11          | 13%                                                                                                          |
| <b>t22/301</b> | Reporting of non-significant difference in functional class index as significant | t22r1 Results, p164 | "FCI was 2.38 ± 0.26 and 2.2 ± 0.20 in the recipient and control groups before treatment. There was a significant difference between these values." |                 | T-test gives p=0.59                                                                                          |

|                |                                                                                                                                                              |                                 |                                                                                                                                        |                          |                                                                 |
|----------------|--------------------------------------------------------------------------------------------------------------------------------------------------------------|---------------------------------|----------------------------------------------------------------------------------------------------------------------------------------|--------------------------|-----------------------------------------------------------------|
| <b>t22/302</b> | Reporting of non-significant difference in functional class index as significant                                                                             | t22r1 Results and Table 2, p164 | "The difference in FCI between the bone marrow and control groups was significant after 6 months." $1.13 \pm 0.12$ and $1.06 \pm 0.24$ |                          | T-test gives $p=0.80$                                           |
| <b>t22/303</b> | The Table indicates that control arm indicated to have a significant rise in EF, and recipient arm non-significant; this is opposite to conclusion of paper. | t22r1 Table 2 LVEF, p164        | " $p \leq 0.05$ " for control arm                                                                                                      | t22r1 Table 2 LVEF, p164 | $p=0.069$ for recipients                                        |
| <b>t22/304</b> | Contradiction in p-values for LVEF increase in control arm                                                                                                   | t22r1 p.162                     | $p=0.1$                                                                                                                                | t22r1 Table 2 LVEF, p164 | $p<0.05$                                                        |
| <b>t22/305</b> | Describing of non-significant difference in LVEF as significant                                                                                              | t22r1 Results, p164             | "In the bone marrow group, the LVEF increased to $39.37 \pm 2.47\%$ in 6 months which was significantly different ( $P = 0.069$ )"     | t22r1 Methods, p163      | "Statistical significance was assumed at a level of $P<0.05$ ." |

|                |                                                                                                                |                          |                                                                                                                                                                                                     |                                        |                                                                                                                                                                                     |                          |                                                   |
|----------------|----------------------------------------------------------------------------------------------------------------|--------------------------|-----------------------------------------------------------------------------------------------------------------------------------------------------------------------------------------------------|----------------------------------------|-------------------------------------------------------------------------------------------------------------------------------------------------------------------------------------|--------------------------|---------------------------------------------------|
| <b>t22/306</b> | Impossible mean and SEM of final NYHA in Controls                                                              | t22r1<br>Table 2<br>NYHA | For 16 patients, Mean NYHA can only be 1.06 if 1 is in NYHA II and 15 in NYHA I.                                                                                                                    | t22r1<br>Table 2<br>NYHA               | But in that case SEM is 0.06, rather than the 0.24 described                                                                                                                        | t22r1<br>Table 2<br>NYHA | For 10 patients, Mean NYHA cannot be 1.06         |
| <b>t22/307</b> | Impossible mean and SEM of final NYHA in Recipients                                                            | t22r1<br>Table 2<br>NYHA | For 16 patients, Mean NYHA can only be 1.13 if 2 are in NYHA II and 14 in NYHA I.                                                                                                                   | t22r1<br>Table 2<br>NYHA               | But in that case SEM is 0.09, rather than the 0.12 described                                                                                                                        | t22r1<br>Table 2<br>NYHA | For 10 patients, Mean NYHA cannot be 2.38 or 1.13 |
| <b>t22/308</b> | Contradictory p values for perfusion defect score and ambiguity about which group had a significant difference | t22r1<br>Results, p164   | "PDSs decreased to $21.88 \pm 4.27$ and $31.00 \pm 4.50$ in the bone marrow treated and control groups, respectively, the difference was only significant in the [treated] group ( $P \leq 0.05$ )" | t22r1<br>Table 2<br>defect score, p164 | Neither group has a change meeting criteria for statistical significance. In fact the control group is closer to the boundary of statistical significance than the recipient group. |                          |                                                   |
| <b>t24/301</b> | Percentage incompatible with ratio, for controls with CCS angina class > 2 before surgery                      | t24r1<br>Table 2         | 35%                                                                                                                                                                                                 | t24r1<br>Table 2                       | 7/19=37%                                                                                                                                                                            |                          |                                                   |
| <b>t24/302</b> | Percentage incompatible with ratio, for controls with NYHA 3-4 before surgery                                  | t24r1<br>Table 2         | 15%                                                                                                                                                                                                 | t24r1<br>Table 2                       | 3/19=16%                                                                                                                                                                            |                          |                                                   |

|                |                                                                |                  |                                                                                                                     |                  |                                      |
|----------------|----------------------------------------------------------------|------------------|---------------------------------------------------------------------------------------------------------------------|------------------|--------------------------------------|
| <b>t26/301</b> | Discrepancy in change in Duration PV R in controls             | t26r1<br>Table 2 | Change listed as 12                                                                                                 | t26r1<br>Table 2 | 132 at baseline to 142 at 4 months   |
| <b>t26/302</b> | Discrepancy in change in Duration PV R in recipients           | t26r1<br>Table 2 | Change listed as 9                                                                                                  | t26r1<br>Table 2 | 127 at baseline to 138 at 4 months   |
| <b>t26/303</b> | Discrepancy in change in E/E' in recipients                    | t26r1<br>Table 2 | Change listed as - 0.3                                                                                              | t26r1<br>Table 2 | 11.1 at baseline to 11.0 at 4 months |
| <b>t26/304</b> | Discrepancy in change in PV R in controls                      | t26r1<br>Table 2 | Change listed as 0.00                                                                                               | t26r1<br>Table 2 | 0.28 at baseline to 0.30 at 4 months |
| <b>t26/305</b> | Discrepancy in change in late contrast enhancement in controls | t26r2<br>Table 2 | Change listed as - 7.9                                                                                              | t26r2<br>Table 2 | 22.3 at baseline to 14.7 at 4 months |
| <b>t26/306</b> | Discrepancy in change in global LVEF in controls               | t26r1<br>Table 2 | Change listed as 5.0                                                                                                | t26r1<br>Table 2 | 53.0 at baseline to 57.8 at 4 months |
| <b>t27/301</b> | Impossible % patients with target vessel LAD                   | t27r1<br>Table 3 | 44% of 22 is not an integer number of patients. Possible integer numbers of patients would be 9 (41%) and 10 (45%). |                  |                                      |



|                |                                              |                  |                                                                                                                     |
|----------------|----------------------------------------------|------------------|---------------------------------------------------------------------------------------------------------------------|
| <b>t27/302</b> | Impossible % patients with target vessel RCA | t27r1<br>Table 3 | 30% of 22 is not an integer number of patients. Possible integer numbers of patients would be 6 (27%) and 7 (32%).  |
| <b>t27/303</b> | Impossible % patients with target vessel LCX | t27r1<br>Table 3 | 26% of 22 is not an integer number of patients. Possible integer numbers of patients would be 5 (23%) and 6 (27%).  |
| <b>t27/304</b> | Impossible % patients with target vessel LAD | t27r1<br>Table 3 | 46% of 21 is not an integer number of patients. Possible integer numbers of patients would be 9 (43%) and 10 (48%). |
| <b>t27/305</b> | Impossible % patients with target vessel RCA | t27r1<br>Table 3 | 36% of 21 is not an integer number of patients. Possible integer numbers of patients would be 7 (33%) and 8 (38%).  |

|                |                                                                          |                  |                                                                                                                    |                  |                                                                 |
|----------------|--------------------------------------------------------------------------|------------------|--------------------------------------------------------------------------------------------------------------------|------------------|-----------------------------------------------------------------|
| <b>t27/306</b> | Impossible % patients with target vessel LCX                             | t27r1<br>Table 3 | 18% of 21 is not an integer number of patients. Possible integer numbers of patients would be 3 (14%) and 4 (19%). |                  |                                                                 |
| <b>t27/307</b> | Discrepancy in baseline reported SD between Tables                       | t27r2<br>Table 1 | Control group baseline IL-6 SD: 1.86                                                                               | t27r2<br>Table 2 | Control group baseline IL-6 SD: 3.11                            |
| <b>t27/308</b> | Discrepancy in baseline values between Tables                            | t27r2<br>Table 1 | Control group baseline TNF-alpha mean $\pm$ SD: 4.02 $\pm$ 3.11                                                    | t27r2<br>Table 2 | Control group baseline TNF-alpha mean $\pm$ SD: 4.22 $\pm$ 3.14 |
| <b>t27/309</b> | Discrepancy in baseline values between Tables                            | t27r2<br>Table 1 | Control group baseline QTc mean $\pm$ SD: 481 $\pm$ 55                                                             | t27r2<br>Table 2 | Control group baseline QTc mean $\pm$ SD: 482 $\pm$ 26          |
| <b>t27/310</b> | Discrepancy in baseline reported SD between Tables                       | t27r2<br>Table 1 | Control group baseline QTVI SD: 0.54                                                                               | t27r2<br>Table 2 | Control group baseline QTVI SD: 0.18                            |
| <b>t28/301</b> | Contradicting numbers of patients with nsVT in active group on follow-up | t28r2<br>Table 4 | 3 (13)                                                                                                             | t28r2<br>Table 3 | 9 (25)                                                          |

|                |                                                                   |                  |                                                                                                                                                                                                |                  |                       |
|----------------|-------------------------------------------------------------------|------------------|------------------------------------------------------------------------------------------------------------------------------------------------------------------------------------------------|------------------|-----------------------|
| <b>t28/302</b> | Fractional patients (impossible %)                                | t28r1            | 12.5% of any possible n: 25, 26, 34, 35 or 36 (not clear which group is being referred to) does not give an integer number of patients                                                         |                  |                       |
| <b>t29/301</b> | Discrepant mean for infarct size at 3 months in Group C           | t29r1<br>Table 1 | Individual patient values 0.41, 0.16, 0.37, 0.49, 0.76, whose mean is 0.438 (or at most 0.443 with rounding)                                                                                   | t29r1<br>Table 1 | Mean is given as 0.46 |
| <b>t29/302</b> | Discrepant standard deviation for 3 month infarct size in Group C | t29r1<br>Table 1 | Individual patient values 0.41, 0.16, 0.37, 0.49, 0.76, whose SD is 0.217 (or at most 0.222 with rounding)                                                                                     | t29r1<br>Table 1 | SD is given as 0.25   |
| <b>t29/303</b> | Discrepant mean for 6 month viable area in Group C                | t29r1<br>Table 1 | Individual patient values of 0.08, 0.25 and 0.16 whose mean is 0.163. If the cells marked "-" are taken as zero, the mean is 0.098 (or at least 0.095 if the nonzero values have been rounded) | t29r1<br>Table 1 | Mean is given as 0.09 |

|                |                                                                                       |                  |                                                                                                                                                                                           |                                      |                                                                                                      |                  |                                                                                     |
|----------------|---------------------------------------------------------------------------------------|------------------|-------------------------------------------------------------------------------------------------------------------------------------------------------------------------------------------|--------------------------------------|------------------------------------------------------------------------------------------------------|------------------|-------------------------------------------------------------------------------------|
| <b>t29/304</b> | Discrepant mean for 12 month viable area in Group C                                   | t29r1<br>Table 1 | Individual patient values of 0.08 and 0.15 whose mean is 0.115. If the cells marked "-" are taken as zero, the mean is 0.0575 (or at least 0.055 if the nonzero values have been rounded) | t29r1<br>Table 1                     | Mean is given as 0.05                                                                                |                  |                                                                                     |
| <b>t29/305</b> | Discrepancy in MBF in noninfarct area in group B between table and figure             | t29r1<br>Table 2 | Mean % decrease from baseline to 3 months is >15%                                                                                                                                         | t29r1<br>Figure 4<br>righthand panel | Figure shows the decrease to be much less than 15% (appears to be 11%). Not explainable by rounding. |                  |                                                                                     |
| <b>t29/306</b> | Discrepancy in MBF in noninfarct area in group B between table and figure             | t29r1<br>Table 2 | Mean % decrease from baseline to 12 months is <20%                                                                                                                                        | t29r1<br>Figure 4<br>righthand panel | Figure shows a clearly >50% (appears to be 59%) decrease from baseline to 12 months                  |                  |                                                                                     |
| <b>t30/301</b> | The stated change in the variable contradicts the stated baseline and followup values | t30r1<br>Table 1 | Baseline percentage of transmural MI extent in recipients = 59                                                                                                                            | t30r1<br>Table 2                     | 6 month percentage of transmural MI extent in recipients = 62                                        | t30r1<br>Table 2 | Difference listed as 1, but should be 3 (even with rounding, cannot be less than 2) |

|                |                                                                                       |                      |                                                              |                        |                                                             |                  |                                                                                                 |
|----------------|---------------------------------------------------------------------------------------|----------------------|--------------------------------------------------------------|------------------------|-------------------------------------------------------------|------------------|-------------------------------------------------------------------------------------------------|
| <b>t30/302</b> | The stated change in the variable contradicts the stated baseline and followup values | t30r1<br>Table 1     | Baseline percentage of transmural MI extent in controls = 63 | t30r1<br>Table 2       | 6 month percentage of transmural MI extent in controls = 59 | t30r1<br>Table 2 | Difference listed as 9, but should be -4 (even with rounding, change cannot be further than -5) |
| <b>t32/301</b> | Discrepant change in LVEF from baseline to 6 months in controls                       | t32r1<br>Table 3     | 9.40%                                                        | t32r1<br>Abstract      | Change from 48.6% to 57%, so an increase of 8.4%            |                  |                                                                                                 |
| <b>t32/302</b> | Discrepant mean LVEF at 6 months in recipients                                        | t32r1<br>Abstract    | 55.20%                                                       | t32r1<br>Results p 431 | 55.10%                                                      |                  |                                                                                                 |
| <b>t32/303</b> | Discrepant SD of LVEF at 6 months in recipients                                       | t32r1<br>Abstract    | 9.80%                                                        | t32r1<br>Results p 431 | 9.60%                                                       |                  |                                                                                                 |
| <b>t32/304</b> | Discrepant mean LVEF at 6 months in controls                                          | t32r1<br>Abstract    | 57.00%                                                       | t32r1<br>Results p 431 | 56.70%                                                      |                  |                                                                                                 |
| <b>t32/305</b> | Discrepant SD of LVEF at 6 months in controls                                         | t32r1<br>Abstract    | 13.40%                                                       | t32r1<br>Results p 431 | 13.90%                                                      |                  |                                                                                                 |
| <b>t33/301</b> | Unexplained P value                                                                   | t33r1 p94<br>Table 2 | Extra p value of 0.20 at top of Table                        |                        |                                                             |                  |                                                                                                 |
| <b>t33/302</b> | Unexplained P value                                                                   | t33r1 p94<br>Table 3 | Extra p value of 0.20 at top of Table                        |                        |                                                             |                  |                                                                                                 |

|                |                                                               |                   |                                                                                                                                                                         |       |                                                                                                                                              |       |                                                                                                                                              |
|----------------|---------------------------------------------------------------|-------------------|-------------------------------------------------------------------------------------------------------------------------------------------------------------------------|-------|----------------------------------------------------------------------------------------------------------------------------------------------|-------|----------------------------------------------------------------------------------------------------------------------------------------------|
| <b>t33/303</b> | Unexplained P value                                           | t33r1 p94 Table 4 | Extra p value of 0.20 at top of Table                                                                                                                                   |       |                                                                                                                                              |       |                                                                                                                                              |
| <b>t34/301</b> | Mathematically impossible claim of 3 month NYHA in recipients | t34r3 Table 2     | No combination of integer values can produce a mean that can be rounded to 2.4 whilst having a standard deviation that can be rounded to 0.2 (as explained in appendix) |       |                                                                                                                                              |       |                                                                                                                                              |
| <b>t34/302</b> | Mathematically impossible claim of 6 month NYHA in recipients | t34r3 Table 2     | No combination of integer values can produce a mean that can be rounded to 2.3 whilst having a standard deviation that can be rounded to 0.2                            | t34r2 | No combination of integer values can produce a mean that can be rounded to 2.3 whilst having a standard deviation that can be rounded to 0.2 | t34r1 | No combination of integer values can produce a mean that can be rounded to 2.3 whilst having a standard deviation that can be rounded to 0.2 |
| <b>t34/303</b> | Mathematically impossible claim of 6 month NYHA in controls   | t34r3 Table 2     | No combination of integer values can produce a mean that can be rounded to 3.8 whilst having a standard deviation that can be rounded to 0.1                            |       |                                                                                                                                              |       |                                                                                                                                              |

|                |                                                                |                  |                                                                                                                                              |       |                                                                                                                                              |       |                                                                                                                                              |
|----------------|----------------------------------------------------------------|------------------|----------------------------------------------------------------------------------------------------------------------------------------------|-------|----------------------------------------------------------------------------------------------------------------------------------------------|-------|----------------------------------------------------------------------------------------------------------------------------------------------|
| <b>t34/304</b> | Mathematically impossible claim of 12 month NYHA in recipients | t34r3<br>Table 2 | No combination of integer values can produce a mean that can be rounded to 2.5 whilst having a standard deviation that can be rounded to 0.1 | t34r2 | No combination of integer values can produce a mean that can be rounded to 2.5 whilst having a standard deviation that can be rounded to 0.1 | t34r1 | No combination of integer values can produce a mean that can be rounded to 2.5 whilst having a standard deviation that can be rounded to 0.1 |
| <b>t34/305</b> | Mathematically impossible claim of 12 month NYHA in controls   | t34r3<br>Table 2 | No combination of integer values can produce a mean that can be rounded to 3.9 whilst having a standard deviation that can be rounded to 0.1 |       |                                                                                                                                              |       |                                                                                                                                              |
| <b>t34/306</b> | Mathematically impossible claim of 12 month CCS in recipients  | t34r3<br>Table 2 | No combination of integer values can produce a mean that can be rounded to 1.6 whilst having a standard deviation that can be rounded to 0.4 | t34r2 | No combination of integer values can produce a mean that can be rounded to 1.6 whilst having a standard deviation that can be rounded to 0.4 | t34r1 | No combination of integer values can produce a mean that can be rounded to 1.6 whilst having a standard deviation that can be rounded to 0.4 |

|                |                                                                        |               |                                                                                                                                                                                                                                                       |
|----------------|------------------------------------------------------------------------|---------------|-------------------------------------------------------------------------------------------------------------------------------------------------------------------------------------------------------------------------------------------------------|
| <b>t34/307</b> | Mathematically impossible claim of 12 month CCS in controls            | t34r3 Table 2 | No combination of integer values can produce a mean that can be rounded to 3.5 whilst having a standard deviation that can be rounded to 0.4                                                                                                          |
| <b>t34/308</b> | 3-month change in NYHA amongst recipients is mathematically impossible | t34r3 Table 2 | 25 improved by 1 and 7 improved by 2, so those 54 survivors dropped by $39/54 = 0.7222$ . For the stated drop from 3.3 (in 55) to 2.4, i.e. change of -0.9, would require the extra initial patient to have NYHA of at least $55*3.25 - 54*2.45 - 39$ |



|                |                                                                                            |               |                                                                                                                                                                                                                                    |
|----------------|--------------------------------------------------------------------------------------------|---------------|------------------------------------------------------------------------------------------------------------------------------------------------------------------------------------------------------------------------------------|
| <b>t34/309</b> | 6-month change in NYHA amongst recipients is mathematically impossible                     | t34r3 Table 2 | 29 improved by 1 and 7 improved by 2, so those 53 survivors dropped by $43/53 = 0.81$ . For the stated drop from 3.3 (in 55) to 2.3, i.e. change of -1, would require the both extra initial patients to have NYHA of at least 5.6 |
| <b>t34/310</b> | 3-month change in NYHA standard deviation amongst the control is mathematically impossible | t34r3 Table 2 | 4 improved by 1, so the SD could not increase by more than 0.2 units, while annotated in the Table rose from 0.1 to 0.8                                                                                                            |
| <b>t35/301</b> | Contradiction on P value                                                                   | t35r1 Table 4 | 1 month: LVEF difference between groups: $P < 0.001$                                                                                                                                                                               |
| <b>t35/302</b> | Medically impossible NYHA class in recipient postoperatively                               | t35r1 p1634   | t35r2 Slide 31 1 month: LVEF difference between groups: $P = 0.002$                                                                                                                                                                |
| <b>t35/303</b> | Medically impossible NYHA class in recipient postoperatively                               | t35r1 p1634   | NYHA 0                                                                                                                                                                                                                             |

|                |                                                              |               |                                                   |                |            |   |   |
|----------------|--------------------------------------------------------------|---------------|---------------------------------------------------|----------------|------------|---|---|
| <b>t35/304</b> | Medically impossible NYHA class in recipient postoperatively | t35r1 p1634   | NYHA 0                                            |                |            |   |   |
| <b>t35/305</b> | Medically impossible NYHA class in recipient postoperatively | t35r1 p1634   | NYHA 0                                            |                |            |   |   |
| <b>t35/306</b> | Medically impossible NYHA class in recipient postoperatively | t35r1 p1634   | NYHA 0                                            |                |            |   |   |
| <b>t35/307</b> | Medically impossible NYHA class in recipient postoperatively | t35r1 p1634   | NYHA 0.7                                          |                |            |   |   |
| <b>t36/301</b> | Discrepancy in PI- IRA dip at 3 months in controls           | t36r1 Table 3 | PI-IRA dip at 3 months for controls: 2.86 ±0.61   | t36r1 Figure 3 | Mean > 2.9 | 0 | 0 |
| <b>t36/302</b> | Discrepancy in PI- IRA dip at 6 months in controls           | t36r1 Table 3 | PI-IRA dip at 6 months for controls: 3.06 ±0.46   | t36r1 Figure 3 | Mean > 3.1 |   |   |
| <b>t36/303</b> | Discrepancy in PI- IRA dip at 6 months in recipients         | t36r1 Table 3 | PI-IRA dip at 6 months for recipients: 2.63 ±0.77 | t36r1 Figure 3 | Mean < 2.6 |   |   |

|                |                                                            |                    |                                                                                                                                              |                    |                                       |
|----------------|------------------------------------------------------------|--------------------|----------------------------------------------------------------------------------------------------------------------------------------------|--------------------|---------------------------------------|
| <b>t36/304</b> | Discrepancy in PI- IRA dip at 12 months in recipients      | t36r1<br>Table 3   | PI-IRA dip at 12 months for recipients: 2.71 ±0.63                                                                                           | t36r1<br>Figure 3  | Mean < 2.7                            |
| <b>t40/301</b> | Impossible SD for baseline NYHA of recipients              | t40r3<br>Table 2   | No combination of integer values can produce a mean that can be rounded to 2.4 whilst having a standard deviation that can be rounded to 0.4 |                    |                                       |
| <b>t40/302</b> | Wrong SD shown by error bars in recipient                  | t40r2<br>Table 3   | baseline NYHA class SD=0.8                                                                                                                   | t40r2<br>Figure 3A | Error bar indicates SD of at most 0.4 |
| <b>t40/303</b> | Wrong SD shown by error bars                               | t40r2<br>Table 3   | 3 month NYHA class SD=0.8                                                                                                                    | t40r2<br>Figure 3A | Error bar indicates SD of at most 0.6 |
| <b>t40/304</b> | Wrong SD shown by error bars                               | t40r2<br>Table 3   | 6 month NYHA class SD=0.8                                                                                                                    | t40r2<br>Figure 3A | Error bar indicates SD of at most 0.5 |
| <b>t40/305</b> | Wrong SD shown by error bars                               | t40r2<br>Table 3   | 12 month NYHA class SD=0.8                                                                                                                   | t40r2<br>Figure 3A | Error bar indicates SD of at most 0.6 |
| <b>t41/301</b> | Conflicting number of deaths amongst recipients at 3 years | t41r4<br>(Table 1) | 12 recipients died by 3 years                                                                                                                | t41r4<br>(Text)    | 10 recipients died by 3 years         |

|                |                                                                       |               |                                                                                                                                                    |       |                                     |
|----------------|-----------------------------------------------------------------------|---------------|----------------------------------------------------------------------------------------------------------------------------------------------------|-------|-------------------------------------|
| <b>t41/302</b> | Conflicting number of deaths amongst controls at 3 years              | t41r4 Table 1 | 14 controls died by 3 years                                                                                                                        | t41r2 | 12 controls died by 3 years         |
| <b>t41/303</b> | More NYHA results for recipients at 3 years than there were survivors | t41r4 Table 1 | Of 41 recipients, by 3 years 12 (or 10) had died and 4+22+6+9=41 had NYHA Classes; but 10 or 12 were dead                                          |       |                                     |
| <b>t41/304</b> | Measurements seemingly made in patients who were dead                 | t41r4 Text    | 10 of 45 recipients died before 3 years and 2 were lost to follow up, leaving only 33 recipients who could have had 3-year measurements            | t41r2 | 41 recipients "completed follow-up" |
| <b>t41/305</b> | Mathematically impossible claim of baseline NYHA for recipients       | t41r1 Results | 24 patients, 6 with Class IV. Mean±SD is given as 3.3±0.5. Either must be (6 IV + 18 III) or (6 IV + 17 III + 1 II) which gives 3.3±0.4 or 3.2±0.5 |       |                                     |
| <b>t41/306</b> | Conflicting follow-up                                                 | t41r4         | 28 months Follow-up                                                                                                                                | t41r2 | 2.8 years (33.6 months) Follow-up.  |

|                |                                                                                                            |                           |                                                                                     |                                                                                                             |                                                                 |                                                                          |
|----------------|------------------------------------------------------------------------------------------------------------|---------------------------|-------------------------------------------------------------------------------------|-------------------------------------------------------------------------------------------------------------|-----------------------------------------------------------------|--------------------------------------------------------------------------|
| <b>t41/307</b> | Confusion over number and proportion of control patients who were dead at 3 years                          | t41r4<br>Table 1          | 30% t41r4<br>Table 1                                                                | 14/40 = 35%.<br>(Even if there were indeed 49 patients, as controls in the final NYHA data, 14/49 is 28.6%) |                                                                 |                                                                          |
| <b>t41/308</b> | Discrepant % mortality at 3 years                                                                          | t41r4<br>Table 1          | Mortality for 12 patients out of 41 = 29.2%; Listed as 24.4% in Table 1             |                                                                                                             |                                                                 |                                                                          |
| <b>t41/309</b> | Baseline values of two different parameters quoted as baseline and 3 year follow up in another publication | t41r4<br>Table 1          | Functional status score 51.19 at baseline; Clinical summary score 59.81 at baseline | t41r6                                                                                                       | Overall summary 51.19 at baseline changing to 59.81 at 3 years. | t41r5<br>Clinical summary 51.19 at baseline changing to 67.02 at 3 years |
| <b>t41/310</b> | Sum of controls in the 4 NYHA classes at study end exceeds those that entered                              | t41r4<br>Table 1<br>p1644 | Number of patients at baseline: 40                                                  | t41r4<br>Table 1<br>p1644                                                                                   | 9+10+18+12 = 49                                                 |                                                                          |
| <b>t41/311</b> | Percentage incompatible with ratio, for beta blockers at 3 years in recipients                             | t41r4<br>Table 1          | 70% t41r4<br>Table 1                                                                | 29/41=71%                                                                                                   |                                                                 |                                                                          |

t41/312

3 year EF values of the recipient group contradict the combined values of its two parts

t41r4  
bottom of first column and Table 1

At baseline Table 1 shows there were 12 recipients in NYHA IV and 29 in NYHA III. The text reports that 6 of the NYHA IV patients died, and 10 died overall i.e. 4 of the NYHA III died. This means those surviving to 3 years were composed of 12-6=6 who had begun in NYHA IV, and 29-4=25 who had begun in NYHA III.

t41r4  
bottom of first column and top of second column

Of the recipients surviving to 3 years, the 25 who had originally been in NYHA III had mean final EF of 30.1% and the 6 who had originally been in NYHA IV had mean final EF of 24%. The overall mean EF for the recipients should therefore be  $(6/31)*24\% + (25/31)*30.1\% = 28.9\%$ . [Even if the 24% is a rounding of some value between 23.5% and 24%, the calculation comes to somewhere between 28.8% and 28.9%]

t41r4  
Table 1

Mean EF 28.4% at 3 years.

The contradiction remains even if the "24%" is a rounded value originating anywhere between 23.5% and 24.499%. It remains even if the number of recipients who died was not 10 (as reported in text) but 12 (as reported in the Table 1).

t42/301

SEMs appear in places to be expressed in different units from the means

t42r1  
p1988

EFs in text 0.484±0.5, presumably intended to read 0.484±0.005

|                |                                                                             |                              |                                                                                      |                                         |                                                                                |
|----------------|-----------------------------------------------------------------------------|------------------------------|--------------------------------------------------------------------------------------|-----------------------------------------|--------------------------------------------------------------------------------|
| <b>t42/302</b> | SEMs appear in places to be expressed in different units from the means     | t42r1<br>p1988               | EFs in text $0.457 \pm 0.6$ , presumably intended to read $0.457 \pm 0.006$          |                                         |                                                                                |
| <b>t42/303</b> | SEMs appear in places to be expressed in different units from the means     | t42r1<br>p1988               | EFs in text $0.482 \pm 0.7$ , presumably intended to read $0.482 \pm 0.007$          |                                         |                                                                                |
| <b>t42/304</b> | SEMs appear in places to be expressed in different units from the means     | t42r1<br>p1988               | EFs in text $0.446 \pm 0.6$ , presumably intended to read $0.446 \pm 0.006$          |                                         |                                                                                |
| <b>t42/305</b> | SEMs appear in places to be expressed in different units from the means     | t42r1<br>p1988               | EFs in text $0.505 \pm 0.8$ , presumably intended to read $0.505 \pm 0.008$          |                                         |                                                                                |
| <b>t42/306</b> | SEMs appear in places to be expressed in different units from the means     | t42r1<br>p1988               | EFs in text $0.464 \pm 0.8$ , presumably intended to read $0.464 \pm 0.008$ etc      |                                         |                                                                                |
| <b>t43/301</b> | Missing raw data nevertheless apparently available for statistical analysis | t43r1<br>Figure 1, page 1838 | Data shown for dead patients at 1 and 3 months for IWT, IWMV, LVESD, LVEDD, EF, LVFS | t43r1<br>Methods and Table 4, page 1837 | n=17/18 and n=16/18 at 1 month and 3 months respectively due to patient deaths |

|                |                                                  |                                |                               |                                                  |                                                                           |
|----------------|--------------------------------------------------|--------------------------------|-------------------------------|--------------------------------------------------|---------------------------------------------------------------------------|
| <b>t43/302</b> | More controls in results than were randomized.   | t43r1<br>Methods,<br>page 1833 | 18 controls                   | t43r1<br>Figure 1<br>LVEF<br>panel,<br>page 1838 | More than 18 lines for controls drawn, e.g. in 3-6 month time period      |
| <b>t43/303</b> | More recipients in results than were randomized. | t43r1<br>Methods,<br>page 1833 | 18 recipients                 | t43r1<br>Figure 1<br>LVFS<br>panel               | More than 18 lines for recipients drawn, e.g. in 3 to 6 month time period |
| <b>t43/304</b> | More recipients in results than were randomized. | t43r1<br>Methods,<br>page 1833 | 18 recipients                 | t43r1<br>Figure 1<br>LVEDD<br>panel              | More than 18 lines for recipients drawn, e.g. in 1 to 3 month time period |
| <b>t43/305</b> | More recipients in results than were randomized. | t43r1<br>Methods,<br>page 1833 | 18 recipients                 | t43r1<br>Figure 1<br>LVEDS<br>panel              | More than 18 lines for recipients drawn, e.g. in 1 to 3 month time period |
| <b>t43/306</b> | More operations took place than patients         | t43r1<br>Methods               | MN-BMC group has 18 patients  | t43r1<br>Table 2                                 | 11 OPCAB and 3 CABG+MVP and 4 CABG+SVR and 1 CABG+MVP+SVR is 19           |
| <b>t43/307</b> | More operations took place than patients         | t43r1<br>Methods               | Control group has 18 patients | t43r1<br>Table 2                                 | 11 OPCAB and 2 CABG+MVP and 4 CABG+SVR and 2 CABG+MVP+SVR is 19           |



|                |                                                                                |               |                                                   |                |                                                                                                                                                               |
|----------------|--------------------------------------------------------------------------------|---------------|---------------------------------------------------|----------------|---------------------------------------------------------------------------------------------------------------------------------------------------------------|
| <b>t43/308</b> | Impossible summary statistic discrepant with individual patient data provided. | t43r1 Table 4 | Baseline IWT (Table 4) in recipients has SD 0.57. | t43r1 Figure 1 | Range of IWT is no wider than 1.7 to 2.7. SD of a distribution of this width cannot be larger than $0.5 \cdot \sqrt{18/17} = 0.51$ (as explained in appendix) |
| <b>t43/309</b> | Impossible summary statistic discrepant with individual patient data provided. | t43r1 Table 4 | Baseline IWT (Table 4) in controls has SD 0.78.   | t43r1 Figure 1 | Range of IWT is no wider than 1.7 to 2.7. SD of a distribution of this width cannot be larger than $0.5 \cdot \sqrt{18/17} = 0.51$ (as explained in appendix) |
| <b>t43/310</b> | Impossible summary statistic discrepant with individual patient data provided. | t43r1 Table 4 | 1 month IWT (Table 4) in controls has SD 0.75.    | t43r1 Figure 1 | Range of IWT is no wider than 1.7 to 2.7. SD of a distribution of this width cannot be larger than $0.5 \cdot \sqrt{17/16} = 0.52$                            |
| <b>t43/310</b> | Impossible summary statistic discrepant with individual patient data provided. | t43r1 Table 4 | 3 month IWT (Table 4) in recipients has SD 0.81.  | t43r1 Figure 1 | Range of IWT is no wider than 2.7 to 4.1. Maximum possible SD of a distribution of this width is $0.7 \cdot \sqrt{16/15} = 0.72$                              |

|                |                                                                                |               |                                                 |                |                                                                                                                                   |
|----------------|--------------------------------------------------------------------------------|---------------|-------------------------------------------------|----------------|-----------------------------------------------------------------------------------------------------------------------------------|
| <b>t43/311</b> | Impossible summary statistic discrepant with individual patient data provided. | t43r1 Table 4 | 3 month IWT (Table 4) in controls has SD 0.6.   | t43r1 Figure 1 | Range of IWT is no wider than 1.9 to 2.8. Maximum possible SD of a distribution of this width is $0.45 \cdot \sqrt{16/15} = 0.6$  |
| <b>t43/312</b> | Impossible summary statistic discrepant with individual patient data provided. | t43r1 Table 4 | 6 month IWT (Table 4) in controls has SD 0.67.  | t43r1 Figure 1 | Range of IWT is no wider than 2.2 to 2.8. Maximum possible SD of a distribution of this width is $0.3 \cdot \sqrt{16/15} = 0.31$  |
| <b>t43/313</b> | Impossible summary statistic discrepant with individual patient data provided. | t43r1 Table 4 | 1 month IWMV (Table 4) in controls has SD 1.05. | t43r1 Figure 1 | Range of IWMV is no wider than 2 to 3.5. Maximum possible SD of a distribution of this width is $0.75 \cdot \sqrt{17/16} = 0.77$  |
| <b>t43/314</b> | Impossible summary statistic discrepant with individual patient data provided. | t43r1 Table 4 | 3 month IWMV (Table 4) in controls has SD 0.95. | t43r1 Figure 1 | Range of IWMV is no wider than 2.2 to 3.4. Maximum possible SD of a distribution of this width is $0.6 \cdot \sqrt{16/15} = 0.62$ |

|                |                                                                                |               |                                                      |                |                                                                                                                                   |
|----------------|--------------------------------------------------------------------------------|---------------|------------------------------------------------------|----------------|-----------------------------------------------------------------------------------------------------------------------------------|
| <b>t43/315</b> | Impossible summary statistic discrepant with individual patient data provided. | t43r1 Table 4 | 6 month IWMV (Table 4) in recipients has SD 1.17.    | t43r1 Figure 1 | Range of IWMV is no wider than 3.7 to 5. Maximum possible SD of a distribution of this width is $0.65 \cdot \sqrt{16/15} = 0.67$  |
| <b>t43/316</b> | Impossible summary statistic discrepant with individual patient data provided. | t43r1 Table 4 | 6 month IWMV (Table 4) in controls has SD 0.66.      | t43r1 Figure 1 | Range of IWMV is no wider than 2.3 to 3.3. Maximum possible SD of a distribution of this width is $0.5 \cdot \sqrt{16/15} = 0.52$ |
| <b>t43/317</b> | Impossible summary statistic discrepant with individual patient data provided. | t43r1 Table 4 | Baseline LVEDd (Table 4) in recipients has SD 10.17. | t43r1 Figure 1 | Range of LVEDd is no wider than 58 to 68. Maximum possible SD of a distribution of this width is $5 \cdot \sqrt{18/17} = 5.14$    |
| <b>t43/318</b> | Impossible summary statistic discrepant with individual patient data provided. | t43r1 Table 4 | Baseline LVEDd (Table 4) in controls has SD 9.21.    | t43r1 Figure 1 | Range of LVEDd is no wider than 58 to 68. Maximum possible SD of a distribution of this width is $5 \cdot \sqrt{18/17} = 5.14$    |

|                |                                                                                |               |                                                    |                |                                                                                                                          |
|----------------|--------------------------------------------------------------------------------|---------------|----------------------------------------------------|----------------|--------------------------------------------------------------------------------------------------------------------------|
| <b>t43/319</b> | Impossible summary statistic discrepant with individual patient data provided. | t43r1 Table 4 | 1 month LVEDd (Table 4) in recipients has SD 6.92. | t43r1 Figure 1 | Range of LVEDd is no wider than 57 to 69. Maximum possible SD of a distribution of this width is $6*\sqrt{17/16}=6.18$   |
| <b>t43/320</b> | Impossible summary statistic discrepant with individual patient data provided. | t43r1 Table 4 | 1 month LVEDd (Table 4) in controls has SD 8.38.   | t43r1 Figure 1 | Range of LVEDd is no wider than 56 to 69. Maximum possible SD of a distribution of this width is $6.5*\sqrt{17/16}=6.70$ |
| <b>t43/321</b> | Impossible summary statistic discrepant with individual patient data provided. | t43r1 Table 4 | 3 month LVEDd (Table 4) in controls has SD 10.35.  | t43r1 Figure 1 | Range of LVEDd is no wider than 47 to 65. Maximum possible SD of a distribution of this width is $9*\sqrt{16/15}=9.30$   |
| <b>t43/322</b> | Impossible summary statistic discrepant with individual patient data provided. | t43r1 Table 4 | 6 month LVEDd (Table 4) in recipients has SD 7.25. | t43r1 Figure 1 | Range of LVEDd is no wider than 46 to 57. Maximum possible SD of a distribution of this width is $5.5*\sqrt{16/15}=5.68$ |

|                |                                                                                |               |                                                  |                |                                                                                                                                  |
|----------------|--------------------------------------------------------------------------------|---------------|--------------------------------------------------|----------------|----------------------------------------------------------------------------------------------------------------------------------|
| <b>t43/323</b> | Impossible summary statistic discrepant with individual patient data provided. | t43r1 Table 4 | 6 month LVEDd (Table 4) in controls has SD 9.53. | t43r1 Figure 1 | Range of LVEDd is no wider than 46 to 63. Maximum possible SD of a distribution of this width is $8.5 \cdot \sqrt{16/15} = 8.78$ |
| <b>t43/324</b> | Impossible summary statistic discrepant with individual patient data provided. | t43r1 Table 4 | Baseline EF (Table 4) in recipients has SD 7.28. | t43r1 Figure 1 | Range of EFs is no wider than 29 to 40. Maximum possible SD of a distribution of this width is $5.5 \cdot \sqrt{18/17} = 5.66$   |
| <b>t43/325</b> | Impossible summary statistic discrepant with individual patient data provided. | t43r1 Table 4 | Baseline EF (Table 4) in controls has SD 9.15.   | t43r1 Figure 1 | Range of EFs is no wider than 28 to 40. Maximum possible SD of a distribution of this width is $6 \cdot \sqrt{18/17} = 6.17$     |
| <b>t43/326</b> | Impossible summary statistic discrepant with individual patient data provided. | t43r1 Table 4 | 1 month EF (Table 4) in recipients has SD 10.36. | t43r1 Figure 1 | Range of EFs is no wider than 29 to 41. Maximum possible SD of a distribution of this width is $6 \cdot \sqrt{17/16} = 6.18$     |

|                |                                                                                |               |                                                 |                |                                                                                                                        |
|----------------|--------------------------------------------------------------------------------|---------------|-------------------------------------------------|----------------|------------------------------------------------------------------------------------------------------------------------|
| <b>t43/327</b> | Impossible summary statistic discrepant with individual patient data provided. | t43r1 Table 4 | 1 month EF (Table 4) in controls has SD 7.81.   | t43r1 Figure 1 | Range of EFs is no wider than 27 to 41. Maximum possible SD of a distribution of this width is $7*\sqrt{17/16}=7.22$   |
| <b>t43/328</b> | Impossible summary statistic discrepant with individual patient data provided. | t43r1 Table 4 | 3 month EF (Table 4) in recipients has SD 8.76. | t43r1 Figure 1 | Range of EFs is no wider than 36 to 47. Maximum possible SD of a distribution of this width is $5.5*\sqrt{16/15}=5.68$ |
| <b>t43/329</b> | Impossible summary statistic discrepant with individual patient data provided. | t43r1 Table 4 | 3 month EF (Table 4) in controls has SD 11.46.  | t43r1 Figure 1 | Range of EFs is no wider than 30 to 47. Maximum possible SD of a distribution of this width is $8.5*\sqrt{16/15}=8.78$ |
| <b>t43/330</b> | Impossible summary statistic discrepant with individual patient data provided. | t43r1 Table 4 | 6 month EF (Table 4) in recipients has SD 9.68. | t43r1 Figure 1 | Range of EFs is no wider than 44 to 53. Maximum possible SD of a distribution of this width is $4.5*\sqrt{16/15}=4.65$ |

|                |                                                                                |               |                                                    |                |                                                                                                                                          |
|----------------|--------------------------------------------------------------------------------|---------------|----------------------------------------------------|----------------|------------------------------------------------------------------------------------------------------------------------------------------|
| <b>t43/331</b> | Impossible summary statistic discrepant with individual patient data provided. | t43r1 Table 4 | Baseline LVFS (Table 4) in controls has SD 6.72.   | t43r1 Figure 1 | Range of baseline LVFS is no wider than 21 to 28. Maximum possible SD of a distribution of this width is $3.5 \cdot \sqrt{18/17} = 3.60$ |
| <b>t43/332</b> | Impossible summary statistic discrepant with individual patient data provided. | t43r1 Table 4 | 1 month LVFS (Table 4) in recipients has SD 5.21.  | t43r1 Figure 1 | Range of baseline LVFS is no wider than 21 to 28. Maximum possible SD of a distribution of this width is $3.5 \cdot \sqrt{17/16} = 3.61$ |
| <b>t43/333</b> | Impossible summary statistic discrepant with individual patient data provided. | t43r1 Table 4 | 3 months LVFS (Table 4) in recipients has SD 6.79. | t43r1 Figure 1 | Range of baseline LVFS is no wider than 22 to 30. Maximum possible SD of a distribution of this width is $4 \cdot \sqrt{16/15} = 4.13$   |
| <b>t43/334</b> | Impossible summary statistic discrepant with individual patient data provided. | t43r1 Table 4 | 3 months LVFS (Table 4) in controls has SD 5.1.    | t43r1 Figure 1 | Range of baseline LVFS is no wider than 21 to 30. Maximum possible SD of a distribution of this width is $4.5 \cdot \sqrt{16/15} = 4.65$ |

|                |                                                                                |                   |                                                                                      |                                                       |                                                                                                                                  |
|----------------|--------------------------------------------------------------------------------|-------------------|--------------------------------------------------------------------------------------|-------------------------------------------------------|----------------------------------------------------------------------------------------------------------------------------------|
| <b>t43/335</b> | Impossible summary statistic discrepant with individual patient data provided. | t43r1<br>Table 4  | 6 months LVFS (Table 4) in recipients has SD 6.46.                                   | t43r1<br>Figure 1                                     | Range of baseline LVFS is no wider than 25 to 33. Maximum possible SD of a distribution of this width is $4*\sqrt{(16/15)}=4.13$ |
| <b>t43/336</b> | Table indicates measurements made but Figure indicates no measurement made     | t43r1<br>Figure 1 | At least one recipient has no EF measurement at 1 month (no black square).           | t43r1<br>Table 4                                      | 17/18 had measurements (follow-up was complete, only one dead).                                                                  |
| <b>t43/337</b> | Table indicates measurements made but Figure indicates no measurement made     | t43r1<br>Figure 1 | At least three recipients without an IWT measurement (no black squares) at 3 months. | t43r1<br>Table 4                                      | 16/18 had measurements (follow-up was complete, two dead).                                                                       |
| <b>t43/338</b> | Table indicates measurements made but Figure indicates no measurement made     | t43r1<br>Figure 1 | At least one recipient without an IWMW measurement (no black square) at 3 months.    | t43r1<br>Table 4                                      | 16/18 had measurements (follow-up was complete, two dead).                                                                       |
| <b>t44/301</b> | Discrepant change in Ds in recipients                                          | t44r1<br>Table 2  | Change could be either from 7.28 to 9.94 or 10.12. This is 2.66 or 2.84              | t44r1<br>Results<br>Analysis of segmental LV function | Change given as 3.21                                                                                                             |



|                |                                                                 |                 |                                                                                                                    |                                                 |                                                                                                                           |
|----------------|-----------------------------------------------------------------|-----------------|--------------------------------------------------------------------------------------------------------------------|-------------------------------------------------|---------------------------------------------------------------------------------------------------------------------------|
| <b>t44/302</b> | Discrepant change in Ds in controls                             | t44r1 Table 2   | Change could be either from 6.7 to 7.77 or 7.86. This is 1.07 or 1.16                                              | t44r1 Results Analysis of segmental LV function | Change given as 0.76                                                                                                      |
| <b>t46/301</b> | Data becomes more widely spread but SD apparently shrinks       | t46r1 Figure 1A | The SD has reduced from 1 week to 6 months, whereas the lines plotted show an increase in spread and therefore SD. |                                                 |                                                                                                                           |
| <b>t46/302</b> | Numerical SD gets larger but graphical counterpart gets smaller | t46r1 Figure 1D | SD increases from 2.8 at 1 week to 3.2 at 6 months                                                                 | t46r1 Figure 1D                                 | Error bar representing SD becomes smaller from 1 week to 6 months                                                         |
| <b>t49/301</b> | Infarct Size                                                    | t49r3           | 8% reduction                                                                                                       | t08r5                                           | 30% reduction                                                                                                             |
| <b>t49/302</b> | Ejection Fraction                                               | t49r1           | 4.6% increase                                                                                                      | t49r3                                           | 5.3% increase (from baseline and final values Table 2)                                                                    |
| <b>t49/303</b> | Change in end Systolic Volume ml                                | t49r1           | -3.6ml                                                                                                             | t49r3                                           | -9.8ml                                                                                                                    |
| <b>t49/304</b> | Cell preparation                                                | t49r3           | No overnight cultivation                                                                                           | t49r2                                           | Cells cultivated overnight before administration (explained in the references 6-8 of t49r2 which are t49r6, t49r7, t21r5) |

|                |                                                                                                                             |                            |                                                                      |                            |                                                                      |
|----------------|-----------------------------------------------------------------------------------------------------------------------------|----------------------------|----------------------------------------------------------------------|----------------------------|----------------------------------------------------------------------|
| <b>t49/305</b> | 8-fold overstatement of increase in "normalised systolic ejection rate" in recipients                                       | t49r3 (Table 3)            | from 1.78±0.69 to 1.98±0.77                                          | t49r3 (Table 3)            | Change is quoted as +1.6, contradicting actual change of +0.20       |
| <b>t49/306</b> | 10-fold overstatement of increase in "normalised systolic ejection rate" in controls                                        | t49r3 (Table 3)            | from 1.8±0.71 to 1.83±0.76                                           | t49r3 (Table 3)            | Change is quoted as +0.32, contradicting actual change of +0.03      |
| <b>t49/307</b> | 2-fold overstatement of increase in stroke volume index in recipients                                                       | t49r3 (Table 2)            | from 38.9±10 to 43±8                                                 | t49r3 (Table 3)            | Change is quoted as +6.4, contradicting actual change of +4.1        |
| <b>t49/308</b> | Miscalculation of EF increments in recipients (This, and the ones that follow, is inconsistent by more than rounding error) | t49r3 (Table 2, 12 months) | 12 month change is quoted as +6.9, overstating actual change of +6.7 | t49r3 (Table 2, 60 months) | 60 month change is quoted as +4.6, misstating actual change of +5.3  |
| <b>t49/309</b> | Overstatement of EF declines in controls                                                                                    | t49r3 (Table 2, 12 months) | 12 month change is quoted as -2.3, overstating actual change of -1.3 | t49r3 (Table 2, 60 months) | 60 month change is quoted as -5.8, overstating actual change of -3.9 |

|                          |                                                      |                            |                                                                                                                                              |                            |                                                                          |
|--------------------------|------------------------------------------------------|----------------------------|----------------------------------------------------------------------------------------------------------------------------------------------|----------------------------|--------------------------------------------------------------------------|
| <b>t49/310</b>           | Miscalculation of EDV increments in recipients       | t49r3 (Table 2, 12 months) | 60 month change is quoted as +7.2, overstating actual change of -3                                                                           |                            |                                                                          |
| <b>t49/311</b>           | Miscalculation of EDV changes in controls            | t49r3 (Table 2, 12 months) | 12 month change is quoted as 4.9, overstating actual change of 3                                                                             | t49r3 (Table 2, 60 months) | 60 month change is quoted as 11.6, overstating actual change of 7        |
| <b>t49/312</b>           | Miscalculation of ESV increments in recipients       | t49r3 (Table 2, 12 months) | 60 month change is quoted as -3.6, misstating actual change of -9.8                                                                          |                            |                                                                          |
| <b>t49/313</b>           | Miscalculation of ESV declines in controls           | t49r3 (Table 2, 3 months)  | 3 month change is quoted as -3.1, misstating actual change of -4.8                                                                           | t49r3 (Table 2, 12 months) | 12 month change is quoted as 6.2, overstating actual change of 3,5       |
| <b>t49/313 continued</b> |                                                      | t49r3 (Table 2, 60 months) | 60 month change is quoted as 15.9, overstating actual change of 10.2                                                                         |                            |                                                                          |
| <b>t49/314</b>           | Survival methodology described in contradictory ways | t49r3 (Methods)            | Kaplan-Meier regression: these methods are opposites.                                                                                        | t49r3 (Methods)            | Reference to SPSS survival analysis, but SPSS not used to produce Figure |
| <b>t49/315</b>           | Kaplan Meier plots are not Kaplan Meier plots        | t49r3 (Figure 4)           | Fail to show the event times as discrete downward steps, but rather as diagonal slopes (with one "event" developing gradually over >2 years) |                            |                                                                          |

|                |                                                                       |                 |                                                                                      |
|----------------|-----------------------------------------------------------------------|-----------------|--------------------------------------------------------------------------------------|
| <b>t49/316</b> | Impossible % of recipients with Infarct Related Coronary Artery - RCA | t49r3 (Table 1) | 32.6% of 62 is not an integer number of patients. Could be 20 (32/3%) or 21 (33.9%). |
| <b>t49/317</b> | Impossible % of recipients with Infarct Related Coronary Artery - LAD | t49r3 (Table 1) | 48.8% of 62 is not an integer number of patients. Could be 30 (48.4%) or 31 (50.0%). |
| <b>t49/318</b> | Impossible % of recipients with Infarct Related Coronary Artery - RCX | t49r3 (Table 1) | 18.6% of 62 is not an integer number of patients. Could be 11 (17.7%) or 12 (19.4%). |
| <b>t49/319</b> | Impossible % of controls on statin                                    | t49r3 (Table 1) | 91% of 62 is not an integer number of patients. Could be 56 (90%) or 57 (92%).       |
| <b>t49/320</b> | Impossible % of recipients on beta-blocker                            | t49r3 (Table 1) | 93% of 62 is not an integer number of patients. Could be 57 (92%) or 58 (94%).       |
| <b>t49/321</b> | Impossible % of controls with hyperlipidemia                          | t49r3 (Table 1) | 91% of 62 is not an integer number of patients. Could be 56 (90%) or 57 (92%).       |

|                |                                                              |                    |                                                                                |
|----------------|--------------------------------------------------------------|--------------------|--------------------------------------------------------------------------------|
| <b>t49/322</b> | Impossible % of controls who are smokers                     | t49r3<br>(Table 1) | 54% of 62 is not an integer number of patients. Could be 33 (53%) or 34 (55%). |
| <b>t49/323</b> | Impossible % of controls with obesity                        | t49r3<br>(Table 1) | 57% of 62 is not an integer number of patients. Could be 35 (56%) or 36 (58%). |
| <b>t49/324</b> | Missed significant change for recipients in EDV at 60 months | t49r3<br>(Table 2) | +7.2 (SD 17.7),<br>p<0.01                                                      |
| <b>t49/325</b> | Missed significant change for recipients in ESV 60 mo        | t49r3<br>(Table 2) | -3.6 (SD13.5)<br>p<0.05                                                        |
| <b>t49/326</b> | Missed significant change for recipients in EF 60 mo         | t49r3<br>(Table 2) | +4.6 (SD 6.6),<br>p<0.01                                                       |
| <b>t49/327</b> | Missed significant change for recipients in SVI 12 mo        | t49r3<br>(Table 2) | +4.7 (SD 8.7),<br>p<0.01                                                       |

|                |                                                       |                 |                         |
|----------------|-------------------------------------------------------|-----------------|-------------------------|
| <b>t49/328</b> | Missed significant change for recipients in SVI 60 mo | t49r3 (Table 2) | +6.4 (SD 6.5), p<0.01   |
| <b>t49/329</b> | Missed significant change for controls in EDV 3 mo    | t49r3 (Table 2) | -3 (SD 10), p<0.05      |
| <b>t49/330</b> | Missed significant change for controls in EDV 12 mo   | t49r3 (Table 2) | +4.9 (SD 14.5), p<0.01  |
| <b>t49/331</b> | Missed significant change for controls in EDV 60 mo   | t49r3 (Table 2) | +11.6 (SD 20.2), p<0.01 |
| <b>t49/332</b> | Missed significant change for controls in ESV 3 mo    | t49r3 (Table 2) | -3.1 (SD 7.7), p<0.01   |
| <b>t49/333</b> | Missed significant change for controls in ESV 12 mo   | t49r3 (Table 2) | +6.2 (SD 9.7), p<0.01   |

|                |                                                                 |                    |                            |
|----------------|-----------------------------------------------------------------|--------------------|----------------------------|
| <b>t49/334</b> | Missed<br>significant<br>change for<br>controls in ESV<br>60 mo | t49r3<br>(Table 2) | +15.9 (SD 14.9),<br>p<0.01 |
| <b>t49/335</b> | Missed<br>significant<br>change for<br>controls in EF 3<br>mo   | t49r3<br>(Table 2) | +1 (SD 1.98),<br>p<0.01    |
| <b>t49/336</b> | Missed<br>significant<br>change for<br>controls in EF 12<br>mo  | t49r3<br>(Table 2) | -2.3 (SD 2.7),<br>p<0.01   |
| <b>t49/337</b> | Missed<br>significant<br>change for<br>controls in EF 60<br>mo  | t49r3<br>(Table 2) | -5.8 (SD 4), p<0.01        |
| <b>t49/338</b> | Missed<br>significant<br>change for<br>controls in SVI<br>12 mo | t49r3<br>(Table 2) | -1.24 (SD 3.5),<br>p<0.05  |
| <b>t49/339</b> | Missed<br>significant<br>change for<br>controls in SVI<br>60 mo | t49r3<br>(Table 2) | -6.7 (SD 13.9),<br>p<0.01  |

|                |                                                                         |                    |                            |
|----------------|-------------------------------------------------------------------------|--------------------|----------------------------|
| <b>t49/340</b> | Missed significant change for controls in MNSER                         | t49r3<br>(Table 3) | +0.32 (SD 0.9),<br>p<0.01  |
| <b>t49/341</b> | Missed significant change for controls in Psyst/ESV                     | t49r3<br>(Table 3) | +0.13 (SD 0.33),<br>p<0.05 |
| <b>t49/342</b> | Missed significant change for controls in Infarct Size                  | t49r3<br>(Table 3) | +5.3 (SD 12.9),<br>p<0.01  |
| <b>t49/343</b> | Missed significant change in Control infarcted - T-End Diastolic        | t49r3<br>(Table 4) | +0.5 (SD 1.2),<br>p<0.01   |
| <b>t49/344</b> | Missed significant change in Control - non-infarcted - T - End systolic | t49r3<br>(Table 4) | +0.8 (SD 2.1),<br>p<0.01   |
| <b>t49/345</b> | Missed significant change for controls in LP (simson)                   | t49r3<br>(Table 5) | +0.5 (SD 0.77),<br>p<0.01  |



|                |                                                                     |                 |                                                                                |
|----------------|---------------------------------------------------------------------|-----------------|--------------------------------------------------------------------------------|
| <b>t49/346</b> | Missed significant change for controls in HRV                       | t49r3 (Table 5) | -3.5 (SD 8.3), p<0.01                                                          |
| <b>t49/347</b> | Missed significant change for controls Low class                    | t49r3 (Table 5) | +0.48 (SD 1), p<0.01                                                           |
| <b>t49/348</b> | Impossible % of controls with Infarct Related Coronary Artery - RCA | t49r3 (Table 1) | 28% of 62 is not an integer number of patients. Could be 17 (27%) or 18 (29%). |
| <b>t49/349</b> | Impossible % of controls with Infarct Related Coronary Artery - RCX | t49r3 (Table 1) | 20% of 62 is not an integer number of patients. Could be 12 (19%) or 13 (21%). |

---
