# Supplementary material
Source: PubMed Central journal article supplement (PMC4793657)
Supplement: nowa013617.ww4_default.pdf [file nowa013617.ww4_default.pdf]

**Appendix 4: Trials and their reports [posted as supplied by author]**

---

| <b>Report</b> | <b>Web link for source</b>                                                                                                                                                                        |
|---------------|---------------------------------------------------------------------------------------------------------------------------------------------------------------------------------------------------|
| t01r1         | <a href="http://www.ncbi.nlm.nih.gov/pubmed/21167340">www.ncbi.nlm.nih.gov/pubmed/21167340</a>                                                                                                    |
| t01r2         | <a href="http://tinyurl.com/DAMASCENEt01r2">http://tinyurl.com/DAMASCENEt01r2</a>                                                                                                                 |
| t02r1         | <a href="http://www.ncbi.nlm.nih.gov/pubmed/17892996">www.ncbi.nlm.nih.gov/pubmed/17892996</a>                                                                                                    |
| t02r2         | <a href="http://www.ncbi.nlm.nih.gov/pubmed/18082489">www.ncbi.nlm.nih.gov/pubmed/18082489</a>                                                                                                    |
| t02r3         | <a href="http://www.ncbi.nlm.nih.gov/pubmed/20851818">www.ncbi.nlm.nih.gov/pubmed/20851818</a>                                                                                                    |
| t02r4         | <a href="http://www.ncbi.nlm.nih.gov/pubmed/19833610">www.ncbi.nlm.nih.gov/pubmed/19833610</a>                                                                                                    |
| t02r5         | <a href="http://www.ncbi.nlm.nih.gov/pubmed/18261689">www.ncbi.nlm.nih.gov/pubmed/18261689</a>                                                                                                    |
| t02r6         | <a href="http://www.ncbi.nlm.nih.gov/pubmed/16990383">www.ncbi.nlm.nih.gov/pubmed/16990383</a>                                                                                                    |
| t03r1         | <a href="http://www.ncbi.nlm.nih.gov/pubmed/21696072">www.ncbi.nlm.nih.gov/pubmed/21696072</a>                                                                                                    |
| t04r1         | <a href="http://www.ncbi.nlm.nih.gov/pubmed/21127322">www.ncbi.nlm.nih.gov/pubmed/21127322</a>                                                                                                    |
| t05r1         | <a href="http://www.ncbi.nlm.nih.gov/pubmed/16520413">www.ncbi.nlm.nih.gov/pubmed/16520413</a>                                                                                                    |
| t05r2         | <a href="http://www.abstractserver.de/dgk2005/ft/abstracts/P455.htm">www.abstractserver.de/dgk2005/ft/abstracts/P455.htm</a>                                                                      |
| t05r3         | <a href="http://www.ncbi.nlm.nih.gov/pubmed/19773226">www.ncbi.nlm.nih.gov/pubmed/19773226</a>                                                                                                    |
| t06r1         | <a href="http://www.ncbi.nlm.nih.gov/pubmed/17070173">www.ncbi.nlm.nih.gov/pubmed/17070173</a>                                                                                                    |
| t06r2         | <a href="http://www.ncbi.nlm.nih.gov/pubmed/20838286">www.ncbi.nlm.nih.gov/pubmed/20838286</a>                                                                                                    |
| t06r3         | <a href="http://www.ncbi.nlm.nih.gov/pubmed/17764767">www.ncbi.nlm.nih.gov/pubmed/17764767</a>                                                                                                    |
| t07r1         | <a href="http://d-nb.info/997163283/about/html">http://d-nb.info/997163283/about/html</a><br>Number 7 in chapter list: <a href="http://d-nb.info/997163283/04">http://d-nb.info/997163283/04</a>  |
| t07r2         | <a href="http://ft2009.dgk.org/programm/buch/ft2009programm.pdf">http://ft2009.dgk.org/programm/buch/ft2009programm.pdf</a>                                                                       |
| t07r3         | <a href="http://www.ncbi.nlm.nih.gov/pubmed/22249215">www.ncbi.nlm.nih.gov/pubmed/22249215</a>                                                                                                    |
| t07r4         | <a href="http://d-nb.info/997163283/about/html">http://d-nb.info/997163283/about/html</a><br>Number 9 in chapter list: <a href="http://d-nb.info/997163283/04">http://d-nb.info/997163283/04</a>  |
| t07r5         | <a href="http://www.ncbi.nlm.nih.gov/pubmed/16802553">www.ncbi.nlm.nih.gov/pubmed/16802553</a>                                                                                                    |
| t07r6         | <a href="http://spo.escardio.org/Abstract.aspx?eevtid=15&amp;fp=1665">http://spo.escardio.org/Abstract.aspx?eevtid=15&amp;fp=1665</a>                                                             |
| t07r7         | <a href="http://spo.escardio.org/Abstract.aspx?eevtid=15&amp;fp=1684">http://spo.escardio.org/Abstract.aspx?eevtid=15&amp;fp=1684</a>                                                             |
| t07r8         | <a href="http://informahealthcare.com/doi/abs/10.1080/14653240701851324">http://informahealthcare.com/doi/abs/10.1080/14653240701851324</a>                                                       |
| t07r9         | <a href="http://d-nb.info/997163283/about/html">http://d-nb.info/997163283/about/html</a><br>Number 10 in chapter list: <a href="http://d-nb.info/997163283/04">http://d-nb.info/997163283/04</a> |
| t07r10        | <a href="http://www.ncbi.nlm.nih.gov/pubmed/20576835">www.ncbi.nlm.nih.gov/pubmed/20576835</a>                                                                                                    |
| t07r11        | <a href="http://spo.escardio.org/eslides/view.aspx?eevtid=40&amp;fp=381">http://spo.escardio.org/eslides/view.aspx?eevtid=40&amp;fp=381</a>                                                       |
| t08r1         | <a href="http://d-nb.info/997163283/about/html">http://d-nb.info/997163283/about/html</a><br>Number 13 in chapter list: <a href="http://d-nb.info/997163283/04">http://d-nb.info/997163283/04</a> |
| t08r2         | <a href="http://www.kup.at/kup/pdf/6881.pdf">www.kup.at/kup/pdf/6881.pdf</a>                                                                                                                      |
| t08r3         | <a href="http://www.ncbi.nlm.nih.gov/pubmed/18181953">www.ncbi.nlm.nih.gov/pubmed/18181953</a>                                                                                                    |
| t08r4         | <a href="http://tinyurl.com/DAMASCENEt08r4">http://tinyurl.com/DAMASCENEt08r4</a>                                                                                                                 |
| t08r5         | <a href="http://link.springer.com/article/10.1007%2Fs00108-009-2359-1?LI=true">http://link.springer.com/article/10.1007%2Fs00108-009-2359-1?LI=true</a>                                           |
| t08r6         | <a href="http://www.ncbi.nlm.nih.gov/pubmed/19001002">www.ncbi.nlm.nih.gov/pubmed/19001002</a>                                                                                                    |
| t08r7         | <a href="http://www.ncbi.nlm.nih.gov/pubmed/17161269">www.ncbi.nlm.nih.gov/pubmed/17161269</a>                                                                                                    |
| t08r8         | <a href="http://books.google.co.uk/books?id=Xc1SHo0EHfYC">books.google.co.uk/books?id=Xc1SHo0EHfYC</a>                                                                                            |
| t09r1         | <a href="http://tinyurl.com/DAMASCENEt09r1">http://tinyurl.com/DAMASCENEt09r1</a>                                                                                                                 |
| t09r2         | <a href="http://www.limesmed.com/cardiovascular2010/pdf/abstract.pdf">www.limesmed.com/cardiovascular2010/pdf/abstract.pdf</a>                                                                    |

---

---

t09r3 [www.ncbi.nlm.nih.gov/pubmed/20042424](http://www.ncbi.nlm.nih.gov/pubmed/20042424)  
t09r4 <http://spo.escardio.org/abstract-book/>  
Search ESC Congress 2010 Presentation title "echocardiographic remodeling"  
t09r5 [http://eurjhfsupp.oxfordjournals.org/content/7/Suppl\\_1/113.3.short?rss=1](http://eurjhfsupp.oxfordjournals.org/content/7/Suppl_1/113.3.short?rss=1)  
t09r6 <http://spo.escardio.org/abstract-book/>  
Search ESC Congress 2008 Presentation title "cell transplantation in patients  
after acute myocardial infarction"  
t10r1 [www.ncbi.nlm.nih.gov/pubmed/21664627](http://www.ncbi.nlm.nih.gov/pubmed/21664627)  
t11r1 [www.ncbi.nlm.nih.gov/pubmed/17521544](http://www.ncbi.nlm.nih.gov/pubmed/17521544)  
t12r1 <http://herkules.oulu.fi/isbn9789514293924/isbn9789514293924.pdf>  
t12r2 [www.ncbi.nlm.nih.gov/pubmed/18845667](http://www.ncbi.nlm.nih.gov/pubmed/18845667)  
t13r1 <http://tinyurl.com/DAMASCENEt13r1>  
t13r2 [www.ncbi.nlm.nih.gov/pubmed/22447880](http://www.ncbi.nlm.nih.gov/pubmed/22447880)  
t13r3 <http://tinyurl.com/DAMASCENEt13r3>  
t14r1 [www.ncbi.nlm.nih.gov/pubmed/21641354](http://www.ncbi.nlm.nih.gov/pubmed/21641354)  
t15r1 [www.clinicaltrials.gov/ct2/show/NCT00289822](http://www.clinicaltrials.gov/ct2/show/NCT00289822)  
t15r2 <http://spo.escardio.org/abstract-book/>  
Search World Congress of Cardiology 2006 Presentation title "TOPCARE-CHD"  
t15r3 [www.ncbi.nlm.nih.gov/pubmed/16990385](http://www.ncbi.nlm.nih.gov/pubmed/16990385)  
t16r1 <http://networking.americanheart.org/files/561#.UbtVJvnvtDg>  
t16r2 [http://proceedings.aip.org/resource/2/apcpcs/1503/1/46\\_1?bypassSSO=1](http://proceedings.aip.org/resource/2/apcpcs/1503/1/46_1?bypassSSO=1)  
t16r3 <http://tinyurl.com/DAMASCENEt16r3>  
t16r4 [www.abstractserver.de/dgk2012/ft/abstracts/P994.htm](http://www.abstractserver.de/dgk2012/ft/abstracts/P994.htm)  
t16r5 [www.ncbi.nlm.nih.gov/pubmed/23592107](http://www.ncbi.nlm.nih.gov/pubmed/23592107)  
t17r1 [www.ncbi.nlm.nih.gov/pubmed/19996415](http://www.ncbi.nlm.nih.gov/pubmed/19996415)  
t17r2 [www.ncbi.nlm.nih.gov/pubmed/17098754](http://www.ncbi.nlm.nih.gov/pubmed/17098754)  
t17r3 [www.ncbi.nlm.nih.gov/pubmed/19789401](http://www.ncbi.nlm.nih.gov/pubmed/19789401)  
t17r4 [www.ncbi.nlm.nih.gov/pubmed/16990384](http://www.ncbi.nlm.nih.gov/pubmed/16990384)  
t18r1 [http://circ.ahajournals.org/content/114/1\\_suppl/I-101.long](http://circ.ahajournals.org/content/114/1_suppl/I-101.long)  
t19r1 [www.ncbi.nlm.nih.gov/pubmed/21851907](http://www.ncbi.nlm.nih.gov/pubmed/21851907)  
t19r2 [www.ncbi.nlm.nih.gov/pubmed/21148540](http://www.ncbi.nlm.nih.gov/pubmed/21148540)  
t20r1 [www.ncbi.nlm.nih.gov/pubmed/22424012](http://www.ncbi.nlm.nih.gov/pubmed/22424012)  
t21r1 <http://spo.escardio.org/eslides/view.aspx?eevtid=24&fp=4522>  
t21r2 <http://aha.scientificposters.com/ss/epsSearchSS.cfm>  
Search for Strauer in 2006, and select #2432  
t21r3 <http://tinyurl.com/DAMASCENEt21r3>  
t21r4 <http://link.springer.com/article/10.1007%2Fs00108-006-1697-5?LI=true>  
t21r5 [www.ncbi.nlm.nih.gov/pubmed/16256864](http://www.ncbi.nlm.nih.gov/pubmed/16256864)  
t21r6 [spo.escardio.org/eslides/view.aspx?eevtid=24&fp=5032](http://spo.escardio.org/eslides/view.aspx?eevtid=24&fp=5032)  
t21r7 [www.ncbi.nlm.nih.gov/pubmed/16501614](http://www.ncbi.nlm.nih.gov/pubmed/16501614)  
t21r8 [www.abstractserver.de/dgk2006/ft/abstracts/P1309.htm](http://www.abstractserver.de/dgk2006/ft/abstracts/P1309.htm)  
t21r9 <http://aha.scientificposters.com/ss/epsSearchSS.cfm>  
Search for Strauer in 2005

---

---

|        |                                                                                                                                                                       |
|--------|-----------------------------------------------------------------------------------------------------------------------------------------------------------------------|
| t21r10 | <a href="http://informahealthcare.com/doi/abs/10.1080/03602530802416133">http://informahealthcare.com/doi/abs/10.1080/03602530802416133</a>                           |
| t21r11 | <a href="http://spo.escardio.org/eslides/view.aspx?eevtid=24&amp;fp=591">spo.escardio.org/eslides/view.aspx?eevtid=24&amp;fp=591</a>                                  |
| t21r12 | <a href="http://www.cdusu.de/upload/biosymstrauer041025.pdf">www.cdusu.de/upload/biosymstrauer041025.pdf</a>                                                          |
| t21r13 | <a href="http://www.ncbi.nlm.nih.gov/pubmed/16843203">www.ncbi.nlm.nih.gov/pubmed/16843203</a>                                                                        |
| t22r1  | <a href="http://www.ncbi.nlm.nih.gov/pmc/articles/PMC3413085/">www.ncbi.nlm.nih.gov/pmc/articles/PMC3413085/</a>                                                      |
| t23r1  | <a href="http://www.ncbi.nlm.nih.gov/pubmed/22084195">www.ncbi.nlm.nih.gov/pubmed/22084195</a>                                                                        |
| t24r1  | <a href="http://www.ncbi.nlm.nih.gov/pubmed/18711405">www.ncbi.nlm.nih.gov/pubmed/18711405</a>                                                                        |
| t25r1  | <a href="http://www.ncbi.nlm.nih.gov/pubmed/23137509">www.ncbi.nlm.nih.gov/pubmed/23137509</a>                                                                        |
| t25r2  | <a href="http://www.ncbi.nlm.nih.gov/pubmed/19454638">www.ncbi.nlm.nih.gov/pubmed/19454638</a>                                                                        |
| t26r1  | <a href="http://www.ncbi.nlm.nih.gov/pubmed/19106196">www.ncbi.nlm.nih.gov/pubmed/19106196</a>                                                                        |
| t26r2  | <a href="http://www.ncbi.nlm.nih.gov/pubmed/16413875">www.ncbi.nlm.nih.gov/pubmed/16413875</a>                                                                        |
| t27r1  | <a href="http://www.ncbi.nlm.nih.gov/pubmed/23065358">www.ncbi.nlm.nih.gov/pubmed/23065358</a>                                                                        |
| t27r2  | <a href="http://www.ncbi.nlm.nih.gov/pubmed/21440864">www.ncbi.nlm.nih.gov/pubmed/21440864</a>                                                                        |
| t27r3  | <a href="http://tinyurl.com/DAMASCENEt27r3">http://tinyurl.com/DAMASCENEt27r3</a>                                                                                     |
| t28r1  | <a href="http://spo.escardio.org/abstract-book/">http://spo.escardio.org/abstract-book/</a><br>Search ESC Congress 2009 Presentation title "Intracoronary autologous" |
| t28r2  | <a href="http://www.ncbi.nlm.nih.gov/pubmed/19649993">www.ncbi.nlm.nih.gov/pubmed/19649993</a>                                                                        |
| t28r3  | <a href="http://www.ncbi.nlm.nih.gov/pubmed/19521932">www.ncbi.nlm.nih.gov/pubmed/19521932</a>                                                                        |
| t29r1  | <a href="http://www.ncbi.nlm.nih.gov/pubmed/21078804">www.ncbi.nlm.nih.gov/pubmed/21078804</a>                                                                        |
| t29r2  | <a href="http://www.ncbi.nlm.nih.gov/pubmed/21372740">www.ncbi.nlm.nih.gov/pubmed/21372740</a>                                                                        |
| t30r1  | <a href="http://www.ncbi.nlm.nih.gov/pubmed/22785499">www.ncbi.nlm.nih.gov/pubmed/22785499</a>                                                                        |
| t31r1  | <a href="http://circ.ahajournals.org/content/125/20/2454">http://circ.ahajournals.org/content/125/20/2454</a>                                                         |
| t32r1  | <a href="http://www.ncbi.nlm.nih.gov/pubmed/20826249">www.ncbi.nlm.nih.gov/pubmed/20826249</a>                                                                        |
| t33r1  | <a href="http://www.ajconline.org/article/S0002-9149%2804%2900448-5/abstract">www.ajconline.org/article/S0002-9149%2804%2900448-5/abstract</a>                        |
| t34r1  | <a href="http://content.onlinejacc.org/data/Journals/JAC/23261/02416.pdf">http://content.onlinejacc.org/data/Journals/JAC/23261/02416.pdf</a>                         |
| t34r2  | <a href="http://spo.escardio.org/eslides/view.aspx?eevtid=40&amp;fp=2024">http://spo.escardio.org/eslides/view.aspx?eevtid=40&amp;fp=2024</a>                         |
| t34r3  | <a href="http://www.ncbi.nlm.nih.gov/pubmed/20560030">www.ncbi.nlm.nih.gov/pubmed/20560030</a>                                                                        |
| t35r1  | <a href="http://www.ncbi.nlm.nih.gov/pubmed/16308009">www.ncbi.nlm.nih.gov/pubmed/16308009</a>                                                                        |
| t35r2  | <a href="http://tinyurl.com/DAMASCENEt35r2">http://tinyurl.com/DAMASCENEt35r2</a>                                                                                     |
| t35r3  | <a href="http://tinyurl.com/DAMASCENEt35r3">http://tinyurl.com/DAMASCENEt35r3</a>                                                                                     |
| t36r1  | <a href="http://www.ncbi.nlm.nih.gov/pubmed/20022872">www.ncbi.nlm.nih.gov/pubmed/20022872</a>                                                                        |
| t37r1  | <a href="http://www.ncbi.nlm.nih.gov/pubmed/17572255">www.ncbi.nlm.nih.gov/pubmed/17572255</a>                                                                        |
| t38r1  | <a href="http://www.ncbi.nlm.nih.gov/pubmed/17984132">www.ncbi.nlm.nih.gov/pubmed/17984132</a>                                                                        |
| t39r1  | <a href="http://www.ncbi.nlm.nih.gov/pubmed/19936457">www.ncbi.nlm.nih.gov/pubmed/19936457</a>                                                                        |
| t39r2  | <a href="http://www.ncbi.nlm.nih.gov/pubmed/19558782">www.ncbi.nlm.nih.gov/pubmed/19558782</a>                                                                        |
| t40r1  | <a href="http://www.ncbi.nlm.nih.gov/pubmed/21707914">www.ncbi.nlm.nih.gov/pubmed/21707914</a>                                                                        |
| t40r2  | <a href="http://www.ncbi.nlm.nih.gov/pubmed/21190450">www.ncbi.nlm.nih.gov/pubmed/21190450</a>                                                                        |
| t40r3  | <a href="http://www.ncbi.nlm.nih.gov/pubmed/21188654">www.ncbi.nlm.nih.gov/pubmed/21188654</a>                                                                        |
| t41r1  | <a href="http://eurjhfsupp.oxfordjournals.org/content/5/supplement/96.2.full.pdf">http://eurjhfsupp.oxfordjournals.org/content/5/supplement/96.2.full.pdf</a>         |
| t41r2  | <a href="http://spo.escardio.org/Abstract.aspx?eevtid=31&amp;fp=1400">http://spo.escardio.org/Abstract.aspx?eevtid=31&amp;fp=1400</a>                                 |
| t41r3  | <a href="http://www.ncbi.nlm.nih.gov/pubmed/17161269">www.ncbi.nlm.nih.gov/pubmed/17161269</a>                                                                        |
| t41r4  | <a href="http://www.ncbi.nlm.nih.gov/pubmed/20378086">www.ncbi.nlm.nih.gov/pubmed/20378086</a>                                                                        |
| t41r5  | <a href="http://spo.escardio.org/abstract-book/">http://spo.escardio.org/abstract-book/</a>                                                                           |

---

---

|       |                                                                                                                                                         |
|-------|---------------------------------------------------------------------------------------------------------------------------------------------------------|
|       | Search ESC Congress 2009 Presentation title "cardiomyopathy (ABCD)"                                                                                     |
| t41r6 | <a href="http://spo.escardio.org/eslides/view.aspx?eevtid=33&amp;fp=3086">http://spo.escardio.org/eslides/view.aspx?eevtid=33&amp;fp=3086</a>           |
| t42r1 | <a href="http://www.ncbi.nlm.nih.gov/pubmed/19508995">www.ncbi.nlm.nih.gov/pubmed/19508995</a>                                                          |
| t43r1 | <a href="http://www.ncbi.nlm.nih.gov/pubmed/19021989">www.ncbi.nlm.nih.gov/pubmed/19021989</a>                                                          |
| t44r1 | <a href="http://www.ncbi.nlm.nih.gov/pubmed/16117862">www.ncbi.nlm.nih.gov/pubmed/16117862</a>                                                          |
| t44r2 | <a href="http://spo.escardio.org/abstract-book/">http://spo.escardio.org/abstract-book/</a>                                                             |
|       | Search ESC Congress 2005 Programme number "1368"                                                                                                        |
| t45r1 | <a href="http://www.ncbi.nlm.nih.gov/pubmed/23596006">www.ncbi.nlm.nih.gov/pubmed/23596006</a>                                                          |
| t46r1 | <a href="http://www.ncbi.nlm.nih.gov/pubmed/16775089">www.ncbi.nlm.nih.gov/pubmed/16775089</a>                                                          |
| t47r1 | <a href="http://www.ncbi.nlm.nih.gov/pubmed/23129008">www.ncbi.nlm.nih.gov/pubmed/23129008</a>                                                          |
| t48r1 | <a href="http://www.ncbi.nlm.nih.gov/pubmed/20211323">www.ncbi.nlm.nih.gov/pubmed/20211323</a>                                                          |
| t49r1 | <a href="http://www.ncbi.nlm.nih.gov/pubmed/21884944">www.ncbi.nlm.nih.gov/pubmed/21884944</a>                                                          |
| t49r2 | <a href="http://d-nb.info/997163283/about/html">http://d-nb.info/997163283/about/html</a>                                                               |
|       | Number 8 in chapter list: <a href="http://d-nb.info/997163283/04">http://d-nb.info/997163283/04</a>                                                     |
| t49r3 | <a href="http://www.ncbi.nlm.nih.gov/pubmed/19520249">www.ncbi.nlm.nih.gov/pubmed/19520249</a>                                                          |
| t49r4 | <a href="http://www.abstractserver.de/dgk2005/ft/abstracts/P1031.htm">www.abstractserver.de/dgk2005/ft/abstracts/P1031.htm</a>                          |
| t49r5 | <a href="http://link.springer.com/article/10.1007%2Fs00392-005-1422-8?LI=true">http://link.springer.com/article/10.1007%2Fs00392-005-1422-8?LI=true</a> |
| t49r6 | <a href="http://tinyurl.com/DAMASCENEt49r6">http://tinyurl.com/DAMASCENEt49r6</a>                                                                       |
| t49r7 | <a href="http://www.ncbi.nlm.nih.gov/pubmed/12370212">www.ncbi.nlm.nih.gov/pubmed/12370212</a>                                                          |

---
