# Supplementary material
Source: PubMed Central journal article supplement (PMC4793657)
Supplement: nowa013617.ww5_default.pdf [file nowa013617.ww5_default.pdf]

Appendix 5. Cochrane risk of bias assessment of included randomised controlled trials [posted as supplied by author]

| Trial | Adequate sequence generation? | Allocation concealment? | Blinding? | Incomplete outcome data addressed? | Free of selective reporting? | Free of other bias?                             |
|-------|-------------------------------|-------------------------|-----------|------------------------------------|------------------------------|-------------------------------------------------|
| t01   | Unclear                       | Unclear                 | Unclear   | Unclear                            | Unclear                      | Yes                                             |
| t02   | Yes                           | Yes                     | No        | Yes                                | Yes                          | Yes                                             |
| t03   | Unclear                       | Unclear                 | Unclear   | Yes                                | Unclear                      | Yes                                             |
| t04   | Yes                           | Yes                     | No        | Unclear                            | Yes                          | Yes                                             |
| t05   | No                            | Yes                     | No        | Unclear                            | Yes                          | Yes                                             |
| t06   | Unclear                       | Unclear                 | No        | No                                 | Unclear                      | Yes                                             |
| t07   | No                            | No                      | No        | No                                 | Unclear                      | Unclear (baseline imbalance, acceptor rejecter) |
| t08   | Unclear                       | Unclear                 | Unclear   | Unclear                            | Unclear                      | Unclear                                         |
| t09   | Unclear                       | Unclear                 | No        | Unclear                            | Yes                          | Yes                                             |
| t10   | No                            | No                      | No        | Unclear                            | Yes                          | Yes                                             |
| t11   | Unclear                       | Yes                     | No        | Yes                                | Unclear                      | Yes                                             |
| t12   | Yes                           | Yes                     | Yes       | Unclear                            | Unclear                      | Yes                                             |
| t13   | Yes                           | Unclear                 | Yes       | Unclear                            | Yes                          | Yes                                             |
| t14   | Yes                           | Yes                     | No        | Unclear                            | Yes                          | Yes                                             |
| t15   | Unclear                       | Unclear                 | No        | Unclear                            | Yes                          | Yes                                             |
| t16   | Yes                           | No                      | Yes       | Yes                                | Yes                          | Yes                                             |
| t17   | Unclear                       | Unclear                 | Yes       | Unclear                            | Yes                          | Yes                                             |
| t18   | Unclear                       | Yes                     | No        | Unclear                            | Unclear                      | Yes                                             |
| t19   | Yes                           | Yes                     | No        | Yes                                | Yes                          | Yes                                             |
| t20   | Yes                           | Unclear                 | Yes       | Yes                                | Yes                          | Yes                                             |
| t21   | No                            | No                      | No        | Yes                                | Unclear                      | Unclear (acceptor rejecter)                     |
| t22   | Unclear                       | Unclear                 | No        | Yes                                | Unclear                      | Yes                                             |
| t23   | Unclear                       | Unclear                 | Yes       | Yes                                | Yes                          | Yes                                             |
| t24   | Unclear                       | Unclear                 | Yes       | Unclear                            | Yes                          | Yes                                             |
| t25   | Unclear                       | Yes                     | Yes       | Yes                                | Yes                          | Yes                                             |
| t26   | Yes                           | Yes                     | Yes       | Unclear                            | Yes                          | Yes                                             |
| t27   | Unclear                       | Unclear                 | No        | Unclear                            | Yes                          | Yes                                             |
| t28   | Unclear                       | Unclear                 | No        | No                                 | Unclear                      | Yes                                             |
| t29   | Unclear                       | Unclear                 | No        | No                                 | Unclear                      | Yes                                             |

|     |         |         |         |         |         |                             |
|-----|---------|---------|---------|---------|---------|-----------------------------|
| t30 | Unclear | Unclear | No      | Yes     | Yes     | Yes                         |
| t31 | Yes     | Yes     | Yes     | Yes     | Yes     | Yes                         |
| t32 | Unclear | Unclear | Yes     | Yes     | No      | Yes                         |
| t33 | Unclear | Unclear | No      | Yes     | Yes     | Yes                         |
| t34 | Unclear | Unclear | No      | Unclear | Yes     | Yes                         |
| t35 | No      | Unclear | No      | Yes     | No      | Yes                         |
| t36 | Yes     | Unclear | No      | Yes     | Yes     | Yes                         |
| t37 | Unclear | Unclear | No      | No      | Yes     | Yes                         |
| t38 | Yes     | Yes     | Yes     | Yes     | Yes     | Yes                         |
| t39 | Unclear | No      | No      | No      | Yes     | Yes                         |
| t40 | Unclear | Unclear | No      | Unclear | Unclear | Yes                         |
| t41 | Unclear | Unclear | No      | Unclear | Unclear | Yes                         |
| t42 | Yes     | Yes     | Unclear | Unclear | Unclear | Yes                         |
| t43 | Yes     | Unclear | No      | Yes     | Yes     | Yes                         |
| t44 | Unclear | Unclear | No      | Unclear | Yes     | Yes                         |
| t45 | Unclear | Unclear | No      | No      | Yes     | Yes                         |
| t46 | Unclear | Yes     | Yes     | Yes     | No      | Yes                         |
| t47 | Unclear | Unclear | Yes     | No      | Yes     | Yes                         |
| t48 | Yes     | Unclear | Yes     | Yes     | Yes     | Yes                         |
| t49 | Unclear | Unclear | No      | Unclear | Unclear | Unclear (accepter rejecter) |

---

Accepter rejecter: data were presented in t07r1, t21r8, t49r1 as randomised and in t07r10, t21r5, t49r3 respectively as accepter rejecter

Baseline imbalance: In t7, recipient ejection fraction had mean 29.4 (SD 12.7) and control 36.1 (SD 13.8) with no p-value reported implying non-significance, but calculation suggests  $p=0.0000006$ .
