# Supplementary material
Source: PubMed Central journal article supplement (PMC4793657)
Supplement: nowa013617.ww6_default.pdf [file nowa013617.ww6_default.pdf]

### Appendix 6 - Calculation of ejection fraction effect size [posted as supplied by author]

| Trial | Location of data                     | How effect size was calculated                                                                                                |
|-------|--------------------------------------|-------------------------------------------------------------------------------------------------------------------------------|
| t01   | t01r1 Table IV                       | Change in active group minus change in control group                                                                          |
| t02   | t02r6 Table 2                        | Change in active group minus change in control group                                                                          |
| t03   | t03r1 Table 3                        | Change in active group minus change in control group                                                                          |
| t04   | t04r1 Page 1753                      | Change in active group minus change in control group                                                                          |
| t05   | t05r3 Table 2                        | Change in active group minus change in control group                                                                          |
| t06   | t06r3 Table 2                        | Change in active group minus change in control group                                                                          |
| t07   | t07r1 Page 58                        | (Follow-up minus baseline in active group) minus (follow-up minus baseline in control group)                                  |
| t08   | t08r2 Tabelle 2                      | (Follow-up minus baseline in active group) minus (follow-up minus baseline in control group)                                  |
| t09   | t09r3 Abstract                       | Change in active group minus change in control group                                                                          |
| t10   | t10r1 Table 2                        | (Follow-up minus baseline in active group) minus (follow-up minus baseline in control group)                                  |
| t11   | t11r1 Table 3 and Table 4            | Change in active group minus change in control group                                                                          |
| t12   | t12r2 Table 2                        | Change in active group minus change in control group                                                                          |
| t13   | t13r2 Page 1722                      | Change in active group minus change in control group                                                                          |
| t14   | t14r1 Table II                       | (Follow-up minus baseline in active group) minus (follow-up minus baseline in control group)                                  |
| t15   | t15r3 Page 1225                      | Change in active group minus change in control group                                                                          |
| t16   | t16r5 Abstract                       | Change in active group minus change in control group                                                                          |
| t17   | t17r4 Abstract                       | Change in active group minus change in control group                                                                          |
| t18   | t18r1 Table 3                        | Change in active group minus change in control group                                                                          |
| t19   | t19r2 Abstract                       | Change in active group minus change in control group                                                                          |
| t20   | t20r1 Table II                       | (Follow-up minus baseline in active group) minus (follow-up minus baseline in control group)                                  |
| t21   | t21r5 Table 3                        | (Follow-up minus baseline in active group) minus (follow-up minus baseline in control group)                                  |
| t22   | t22r1 Table 2                        | (Follow-up minus baseline in active group) minus (follow-up minus baseline in control group)                                  |
| t23   | t23r1 Table 4 and Abstract           | Directly stated                                                                                                               |
| t24   | t24r1 Table 4                        | Change in active group minus change in control group                                                                          |
| t25   | t25r2 Table 2                        | Change in active group minus change in control group                                                                          |
| t26   | t26r1 Table 2                        | Change in active group minus change in control group                                                                          |
| t27   | t27r1 Abstract, Table 1 and Figure 2 | (Follow-up minus baseline in active group) minus (follow-up minus baseline in control group)                                  |
| t28   | t28r3 Table II and Table V           | (Follow-up minus baseline in active group) minus (follow-up minus baseline in control group)                                  |
| t29   | t29r1 Supplemental Table 2           | (Follow-up minus baseline in active group) minus (follow-up minus baseline in control group), using individual patient values |
| t30   | t30r1 Table 2                        | Change in active group minus change in control group                                                                          |

|     |                             |                                                                                                                                                                                                                               |
|-----|-----------------------------|-------------------------------------------------------------------------------------------------------------------------------------------------------------------------------------------------------------------------------|
| t31 | t31r1 Table 3               | Change in active group minus change in control group                                                                                                                                                                          |
| t32 | t32r1 Table III             | Change in active group minus change in control group                                                                                                                                                                          |
| t33 | t33r1 Table 2               | (Follow-up minus baseline in active group) minus (follow-up minus baseline in control group)                                                                                                                                  |
| t34 | t34r3 Table 2               | (Follow-up minus baseline in active group) minus (follow-up minus baseline in control group)<br>(Follow-up minus baseline in active group) minus (follow-up minus baseline in control group), using individual patient values |
| t35 | t35r1 Table 2 and Table 3   |                                                                                                                                                                                                                               |
| t36 | t36r1 Figure 2              | (Follow-up minus baseline in active group) minus (follow-up minus baseline in control group)                                                                                                                                  |
| t37 | t37r1 Table 1 and Page 2373 | (Follow-up minus baseline in active group) minus (follow-up minus baseline in control group)                                                                                                                                  |
| t38 | t38r1 Table 2               | Directly stated                                                                                                                                                                                                               |
| t39 | t39r1 Table 3               | (Follow-up minus baseline in active group) minus (follow-up minus baseline in control group)                                                                                                                                  |
| t40 | t40r2 Table 2 and Table 3   | (Follow-up minus baseline in active group) minus (follow-up minus baseline in control group)                                                                                                                                  |
| t41 | t41r4 Table 1               | (Follow-up minus baseline in active group) minus (follow-up minus baseline in control group)                                                                                                                                  |
| t42 | t42r1 Table 2               | Directly stated                                                                                                                                                                                                               |
| t43 | t43r1 Table 4               | (Follow-up minus baseline in active group) minus (follow-up minus baseline in control group)                                                                                                                                  |
| t44 | t44r1 Abstract              | (Follow-up minus baseline in active group) minus (follow-up minus baseline in control group)                                                                                                                                  |
| t45 | t45r1 Abstract              | Directly stated                                                                                                                                                                                                               |
| t46 | t46r1 Abstract              | Change in active group minus change in control group                                                                                                                                                                          |
| t47 | t47r1 Table 4               | Directly stated                                                                                                                                                                                                               |
| t48 | t48r1 Abstract              | Change in active group minus change in control group                                                                                                                                                                          |
| t49 | t49r3 Table 2               | Change in active group minus change in control group                                                                                                                                                                          |

---
