# Supplementary material
Source: PubMed Central journal article supplement (PMC4793657)
Supplement: nowa013617.ww7_default.pdf [file nowa013617.ww7_default.pdf]

**Appendix 7. Discrepancies in safety study [posted as supplied by author]**

| <b>Discrepancy ID</b> | <b>Discrepancy summary</b>                                                                                | <b>Paper 1</b>             | <b>Detail from Paper 1</b>                                                                                                             | <b>Paper 2</b> | <b>Detail from Paper 2</b> |
|-----------------------|-----------------------------------------------------------------------------------------------------------|----------------------------|----------------------------------------------------------------------------------------------------------------------------------------|----------------|----------------------------|
| 1                     | Inconsistent gender of controls between publications                                                      | Leistner et al(43) Table 1 | 190/224=84.8% male                                                                                                                     | Ehrlich(44)    | (n=224) 83.9% male         |
| 2                     | Different baseline NT-proBNP SD for controls between publications (with same mean, n and age of patients) | Leistner et al(43) Table 1 | NT-proBNP SD 4262.8                                                                                                                    | Ehrlich(44)    | NT-proBNP SD 2262          |
| 3                     | Impossible % controls with single chamber ICD                                                             | Leistner et al(43) Table 1 | 47.4% of 224 patients is not an integer number of patients. Possible integer numbers of patients would be 106 (47.3%) and 107 (47.8%). |                |                            |
| 4                     | Impossible % recipients with single chamber ICD                                                           | Leistner et al(43) Table 1 | 60.4% of 112 patients is not an integer number of patients. Possible integer numbers of patients would be 67 (59.8%) and 68 (60.7%).   |                |                            |
| 5                     | Impossible % recipients with double chamber ICD                                                           | Leistner et al(43) Table 1 | 19.8% of 112 patients is not an integer number of patients. Possible integer numbers of patients would be 22 (19.6%) and 23 (20.5%).   |                |                            |

|    |                                                   |                            |                                                                                                                                        |
|----|---------------------------------------------------|----------------------------|----------------------------------------------------------------------------------------------------------------------------------------|
| 6  | Impossible % recipients with triple chamber ICD   | Leistner et al(43) Table 1 | 19.8% of 112 patients is not an integer number of patients. Possible integer numbers of patients would be 22 (19.6%) and 23 (20.5%).   |
| 7  | Impossible % controls with VT before implantation | Leistner et al(43) Table 1 | 19.3% of 224 patients is not an integer number of patients. Possible integer numbers of patients would be 43 (19.2%) and 44 (19.6%).   |
| 8  | Impossible % controls with AF before study        | Leistner et al(43) Table 1 | 26.1% of 224 patients is not an integer number of patients. Possible integer numbers of patients would be 58 (25.9%) and 59 (26.3%).   |
| 9  | Impossible % recipients with AF before study      | Leistner et al(43) Table 1 | 36.8% of 112 patients is not an integer number of patients. Possible integer numbers of patients would be 41 (36.6%) and 42 (37.5%).   |
| 10 | Impossible % recipients on beta blockers          | Leistner et al(43) Table 1 | 91.7% of 112 patients is not an integer number of patients. Possible integer numbers of patients would be 102 (91.1%) and 103 (92.0%). |

|    |                                                |                            |                                                                                                                                        |
|----|------------------------------------------------|----------------------------|----------------------------------------------------------------------------------------------------------------------------------------|
| 11 | Impossible % controls on beta blockers         | Leistner et al(43) Table 1 | 83.4% of 218 patients is not an integer number of patients. Possible integer numbers of patients would be 181 (83.0%) and 182 (83.5%). |
| 12 | Impossible % controls on amiodarone            | Leistner et al(43) Table 1 | 16.8% of 218 patients is not an integer number of patients. Possible integer numbers of patients would be 36 (16.5%) and 37 (17.0%).   |
| 13 | Impossible % controls on other antiarrhythmics | Leistner et al(43) Table 1 | 4.4% of 224 patients is not an integer number of patients. Possible integer numbers of patients would be 9 (4.0%) and 10 (4.5%).       |
| 14 | Impossible % recipients on ACEI                | Leistner et al(43) Table 1 | 89.2% of 112 patients is not an integer number of patients. Possible integer numbers of patients would be 99 (88.4%) and 100 (89.3%).  |
| 15 | Impossible % recipients on statins             | Leistner et al(43) Table 1 | 73.0% of 112 patients is not an integer number of patients. Possible integer numbers of patients would be 81 (72.3%) and 82 (73.2%).   |

|    |                                                 |                                |                                                                                                                                        |                                                                              |
|----|-------------------------------------------------|--------------------------------|----------------------------------------------------------------------------------------------------------------------------------------|------------------------------------------------------------------------------|
| 16 | Impossible % recipients on aldosterone blockers | Leistner et al(43) Table 1     | 66.4% of 112 patients is not an integer number of patients. Possible integer numbers of patients would be 74 (66.1%) and 75 (67.0%).   |                                                                              |
| 17 | Impossible % controls on loop diuretics         | Leistner et al(43) Table 1     | 63.3% of 224 patients is not an integer number of patients. Possible integer numbers of patients would be 141 (62.9%) and 142 (63.4%). |                                                                              |
| 18 | Impossible % controls on other diuretics        | Leistner et al(43) Table 1     | 50.2% of 224 patients is not an integer number of patients. Possible integer numbers of patients would be 112 (50%) and 113 (50.4%).   |                                                                              |
| 19 | Discrepant numbers of patients in AMI group     | De Rosa et al 2013(42) Table 1 | n=126                                                                                                                                  | De Rosa et al 2013(42) Table 1 AMI group male/female n is 118/22, 118+22=140 |
| 20 | Discrepant numbers of patients in ICM group     | De Rosa et al 2013(42) Table 1 | n=562                                                                                                                                  | De Rosa et al 2013(42) Table 1 ICM group male/female n is 496/67, 496+67=563 |
| 21 | Impossible % AMI patients on oral anticoagulant | De Rosa et al 2013(42) Table 1 | 6.5% of 126 patients is not an integer number of patients. Possible integer numbers of patients would be 8 (6.3%) and 9 (7.1%).        |                                                                              |

|    |                                                                                             |                                |                                                                                                                                        |                                                                        |
|----|---------------------------------------------------------------------------------------------|--------------------------------|----------------------------------------------------------------------------------------------------------------------------------------|------------------------------------------------------------------------|
| 22 | Impossible % AMI patients on any diuretic                                                   | De Rosa et al 2013(42) Table 1 | 41.9% of 126 patients is not an integer number of patients. Possible integer numbers of patients would be 52 (41.3%) and 53 (42.1%).   |                                                                        |
| 23 | Impossible % AMI patients on aldosterone antagonist                                         | De Rosa et al 2013(42) Table 1 | 17.6% of 126 patients is not an integer number of patients. Possible integer numbers of patients would be 22 (17.5%) and 23 (18.3%).   |                                                                        |
| 24 | Impossible % ICM patients on antiplatelet                                                   | De Rosa et al 2013(42) Table 1 | 95.3% of 562 patients is not an integer number of patients. Possible integer numbers of patients would be 535 (95.2%) and 536 (95.4%). |                                                                        |
| 25 | Discrepancy in the number of concomitant PCIs performed                                     | De Rosa et al 2013(42) p.47    | PCI was performed during 152(19.6%) procedures                                                                                         | De Rosa et al 2011(45) PCI was performed during 153 (19.7%) procedures |
| 26 | Discrepancy in the percentage of patients with PCI of the vessel targeted for cell infusion | De Rosa et al 2013(42) p.47    | 113 patients (14.4%)                                                                                                                   | De Rosa et al 2011(45) 113 procedures (14.6%)                          |
| 27 | Discrepancy in the percentage of isolated PCI on non-target vessel procedures               | De Rosa et al 2013(42) p.47    | Stated percentage: 5.1%                                                                                                                | De Rosa et al 2013(42) 40 out of 775 procedures is 5.2%                |

|    |                                                                                                               |                                         |                                                                                                                                      |                             |                         |
|----|---------------------------------------------------------------------------------------------------------------|-----------------------------------------|--------------------------------------------------------------------------------------------------------------------------------------|-----------------------------|-------------------------|
| 28 | Discrepancy in the percentage of "intracoronary infusion of cells ... associated with coronary complications" | De Rosa et al 2013(42) p.47             | 11 out of 755 procedures = 1.5%                                                                                                      | De Rosa et al 2013(42) p.47 | Stated percentage: 1.9% |
| 29 | Impossible % controls VT all                                                                                  | Leistner et al(43) Abstract and Table 2 | 27.1% of 224 patients in not an integer number of patients. Possible integer numbers of patients would be 60 (26.8%) and 61 (27.2%). |                             |                         |
| 30 | Impossible % recipients VT/ventricular fibrillation treated by antitachycardia pacing or ICD shock            | Leistner et al(43) Abstract             | 15.6% of 112 patients is not an integer number of patients. Possible integer numbers of patients would be 17 (15.2%) and 18 (16.1%). |                             |                         |
| 31 | Impossible % controls VT/ventricular fibrillation treated by antitachycardia pacing or ICD shock              | Leistner et al(43) Abstract             | 15.5% of 224 patients is not an integer number of patients. Possible integer numbers of patients would be 34 (15.2%) and 35 (15.6%). |                             |                         |
| 32 | Impossible % controls death from arrhythmic cause                                                             | Leistner et al(43) Abstract and Table 2 | 1.0% of 224 patients is not an integer number of patients. Possible integer numbers of patients would be 2 (0.9%) and 3 (1.3%).      |                             |                         |

|    |                                                   |                                         |                                                                                                                                      |
|----|---------------------------------------------------|-----------------------------------------|--------------------------------------------------------------------------------------------------------------------------------------|
| 33 | Impossible % recipients inappropriate therapy     | Leistner et al(43) Abstract and Table 2 | 4.2% of 112 patients is not an integer number of patients. Possible integer numbers of patients would be 4 (3.6%) and 5 (4.5%).      |
| 34 | Impossible % recipients VT + ATP therapy          | Leistner et al(43) Table 2              | 18.8% of 25% of 112 is not an integer number of patients. Possible integer numbers of patients would be 5 (17.9%) and 6 (21.4%).     |
| 35 | Impossible % recipients VT + shock therapy        | Leistner et al(43) Table 2              | 10.4% of 25% of 112 is not an integer number of patients. Possible integer numbers of patients would be 2 (7.1%) and 3 (10.7%).      |
| 36 | Impossible % recipients VF                        | Leistner et al(43) Table 2              | 5.2% of 112 is not an integer number of patients. Possible integer numbers of patients would be 5 (4.5%) and 6 (5.4%).               |
| 37 | Impossible % recipients death of arrhythmic cause | Leistner et al(43) Table 2              | 4.2% of 112 is not an integer number of patients. Possible integer numbers of patients would be 4 (3.6%) and 5 (4.5%).               |
| 38 | Impossible % controls VT + ATP therapy            | Leistner et al(43) Table 2              | 19.6% of 27.1% of 224 is not an integer number of patients. Possible integer numbers of patients would be 11 (18.1%) and 12 (19.8%). |

|    |                                                |                                 |                                                                                                                                                               |                                                           |
|----|------------------------------------------------|---------------------------------|---------------------------------------------------------------------------------------------------------------------------------------------------------------|-----------------------------------------------------------|
| 39 | Impossible % controls<br>VT + shock therapy    | Leistner et al(43) Table 2      | 9% of 27.1% of 224 is not an integer number of patients. Possible integer numbers of patients would be 5 (8.2%) and 6 (9.9%).                                 |                                                           |
| 40 | Impossible % controls<br>VF                    | Leistner et al(43) Table 2      | 6.5% of 224 is not an integer number of patients. Possible integer numbers of patients would be 14 (6.3%) and 15 (6.7%).                                      |                                                           |
| 41 | Impossible % controls<br>inappropriate therapy | Leistner et al(43) Table 2      | 8.8% of 224 is not an integer number of patients. Possible integer numbers of patients would be 19 (8.5%) and 20 (8.9%).                                      |                                                           |
| 42 | Odds ratios not<br>matching up with graph      | Leistner et al(43) Figure 1     | All three bars show lower risk amongs treated cohort, but odds ratios are 1.08, 0.96 and 1.02. So the 1.08 and 1.02 odd ratios, or their bars, are incorrect. |                                                           |
| 43 | Internally discrepant<br>ORs                   | Leistner et al(43) Table 3      | BMC association with VT, OR stated as 1.198 (0.76-1.89)                                                                                                       | Leistner et al(43) Fig 1<br>OR stated as 0.96 (0.59-1.56) |
| 44 | Discrepant %<br>hospitalised patients          | De Rosa et al 2013(42) Abstract | 5/775 is 0.65% not 0.64%                                                                                                                                      |                                                           |

---
