# Supplementary material
Source: PubMed Central journal article supplement (PMC4793657)
Supplement: nowa013617.ww9_default.pdf [file nowa013617.ww9_default.pdf]

Appendix 9. Univariate and Multivariate analyses [posted as supplied by author]

**Univariate analysis**

| Variable                              | Estimate | Std. Error | t value | Pr(>  t ) |
|---------------------------------------|----------|------------|---------|-----------|
| (Intercept)                           | 0.3353   | 1.2157     | 0.276   | 0.7839    |
| log(Number of discrepancies + 1)      | 1.6722   | 0.5258     | 3.18    | 0.0026    |
| (Intercept)                           | 6.8547   | 3.1223     | 2.195   | 0.0331    |
| log(Sample size)                      | -0.8074  | 0.7957     | -1.015  | 0.3154    |
| (Intercept)                           | 4.7535   | 0.7066     | 6.727   | 0.0000    |
| Sequence generation Yes               | -3.2795  | 1.2771     | -2.568  | 0.0135    |
| (Intercept)                           | 4.158    | 0.7353     | 5.655   | 0.0000    |
| Allocation concealment Yes            | -1.4294  | 1.3756     | -1.039  | 0.3040    |
| (Intercept)                           | 4.8568   | 0.6958     | 6.98    | 0.0000    |
| Blinding Yes                          | -3.6168  | 1.2576     | -2.876  | 0.0060    |
| (Intercept)                           | 3.949    | 0.8157     | 4.841   | 0.0000    |
| Incomplete outcome data addressed Yes | -0.4885  | 1.2768     | -0.383  | 0.7040    |
| (Intercept)                           | 5.6579   | 0.9446     | 5.99    | 0.0000    |
| Free of selective reporting Yes       | -3.1169  | 1.2072     | -2.582  | 0.0130    |

**Multivariate analysis**

| Variable                         | Estimate | Std. Error | t value | Pr(>  t ) |
|----------------------------------|----------|------------|---------|-----------|
| (Intercept)                      | 5.3417   | 2.7741     | 1.926   | 0.0611    |
| log(Number of discrepancies + 1) | 2.2079   | 0.5728     | 3.855   | 0.0004    |
| log(Sample size)                 | -1.3112  | 0.7651     | -1.714  | 0.0941    |
| Sequence generation Yes          | -3.1131  | 1.4219     | -2.189  | 0.0343    |
| Blinding Yes                     | -2.3328  | 1.209      | -1.93   | 0.0606    |

Residual standard error: 3.43 on 44 degrees of freedom

Multiple R-squared: 0.431

Adjusted R-squared: 0.3793

F-statistic: 8.333 on 4 and 44 DF

p-value: 0.00004292

Sample size was log transformed (natural log). For discrepancy count, 1 was added before log transformation, to accommodate zero values.
