# Supplementary material
Source: PubMed Central journal article supplement (PMC4793657)
Supplement: nowa013617.ww10_default.pdf [file nowa013617.ww10_default.pdf]

# Appendix 10. Meta-analysis

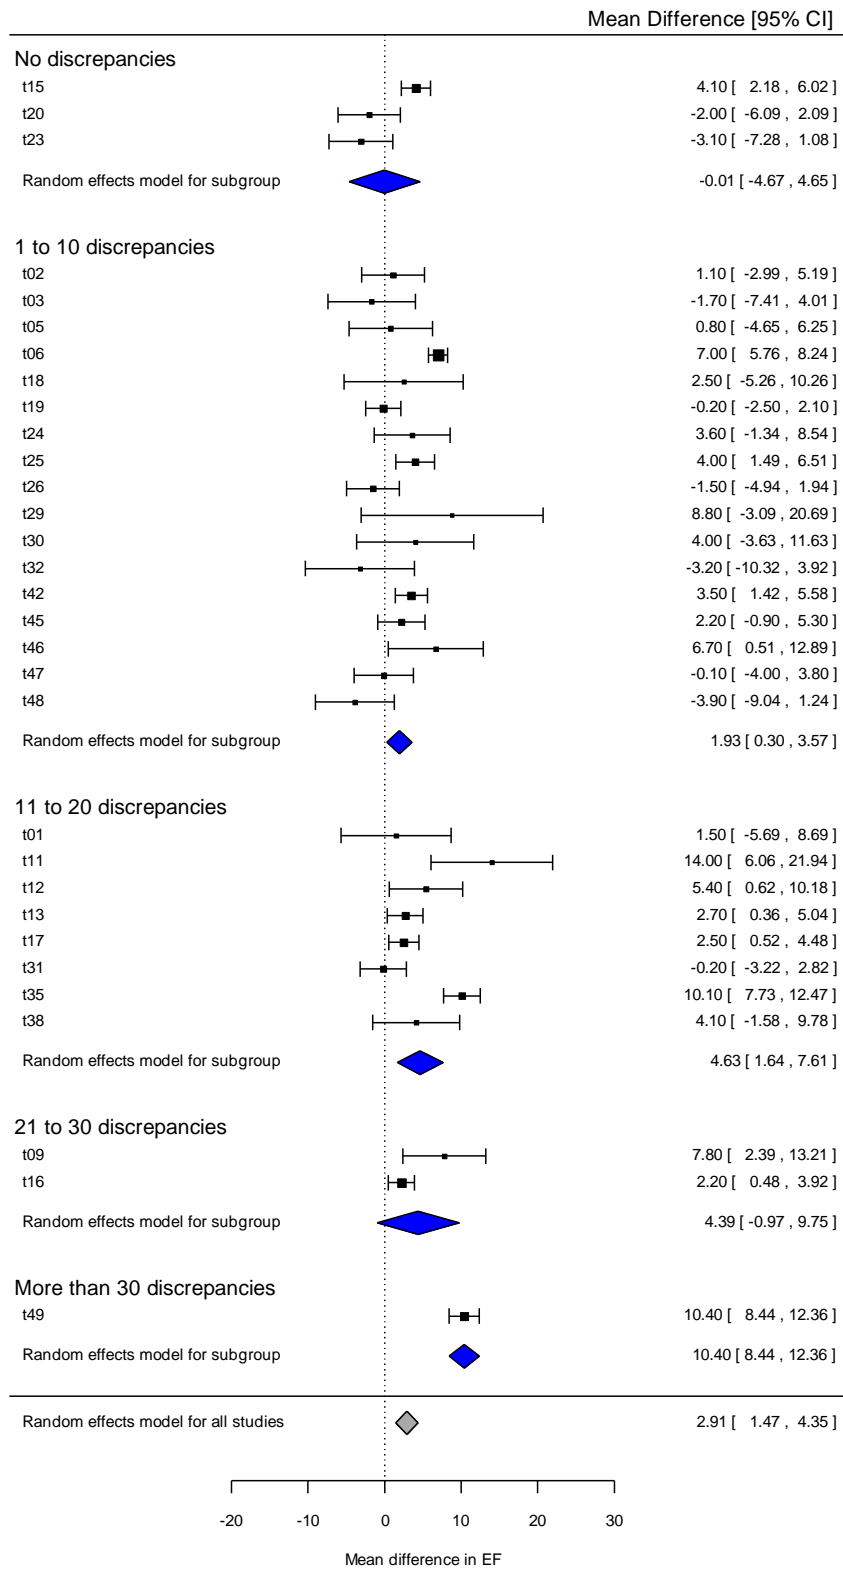

Forest plot for the 31 trials that provided sufficient data to determine the standard error of their effect size estimates. Bars are 95% confidence intervals. Heterogeneity across the 31 studies:  $I^2=85.12\%$ ,  $p<0.0001$ .
