# Supplementary material
Source: PubMed Central journal article supplement (PMC4793657)

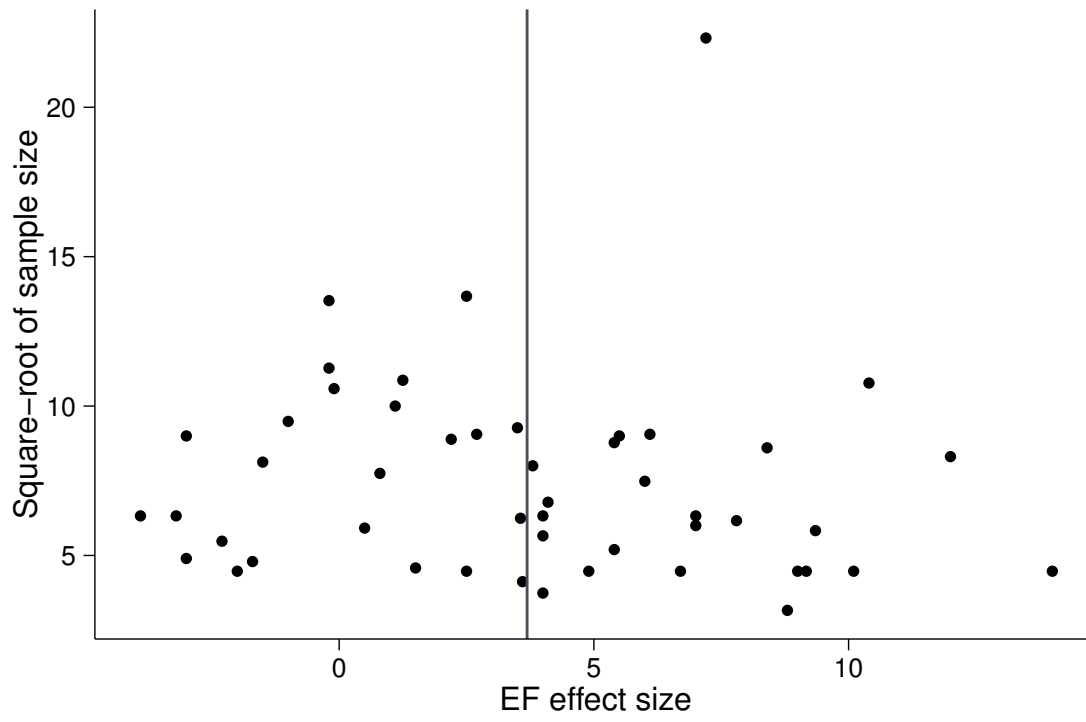

Appendix 8: Funnel plot [posted as supplied by author]

Supplement: nowa013617.ww8_default.pdf [file nowa013617.ww8_default.pdf]
